# Supplementary material
Source: publisher site journal article supplement (https://www.dovepress.com/article/441675)
Supplement: Supplementary file 1 [file get_supplementary_file.php]

## Supplementary Figure

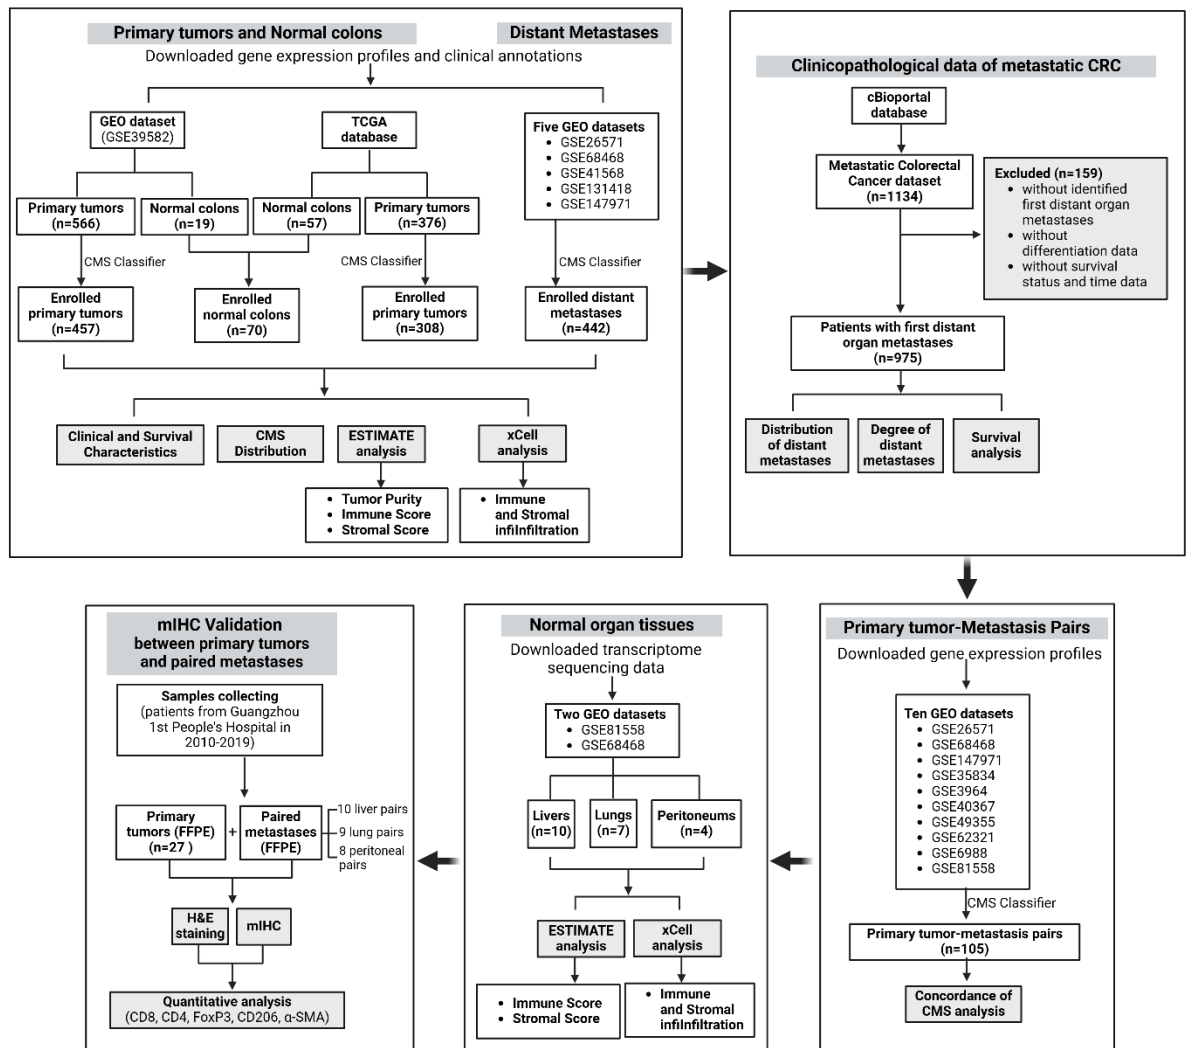

**Supplementary Figure 1. Analysis flowchart of the study.**

Gene expression profiles and clinical annotations of primary tumors, distant metastases and normal colons were obtained from the GEO and TCGA database. Clinicopathological data of metastatic CRC were collected from Metastatic Colorectal Cancer of cBioportal. 105 pairs of primary tumors and matched metastases were extracted from ten GEO datasets. In addition, transcriptome sequencing data of normal organ tissues were obtained from two GEO datasets. Finally, we retrospectively collected 27 pairs of FFPE samples of primary tumors and matched metastases for mIHC validation in tumor microenvironment features.

GEO, Gene Expression Omnibus; TCGA, The Cancer Genome Atlas; CMS, Consensus Molecular Subgroups; CRC, colorectal cancer; ESTIMATE, Estimation of STromal and Immune cells in Malignant Tumor tissues using Expression data; FFPE, formalin fixation and paraffin embedding; H&E, hematoxylin-eosin staining; mIHC, multiplex immunohistochemistry staining;  $\alpha$ -SMA, alpha-smooth muscle actin.

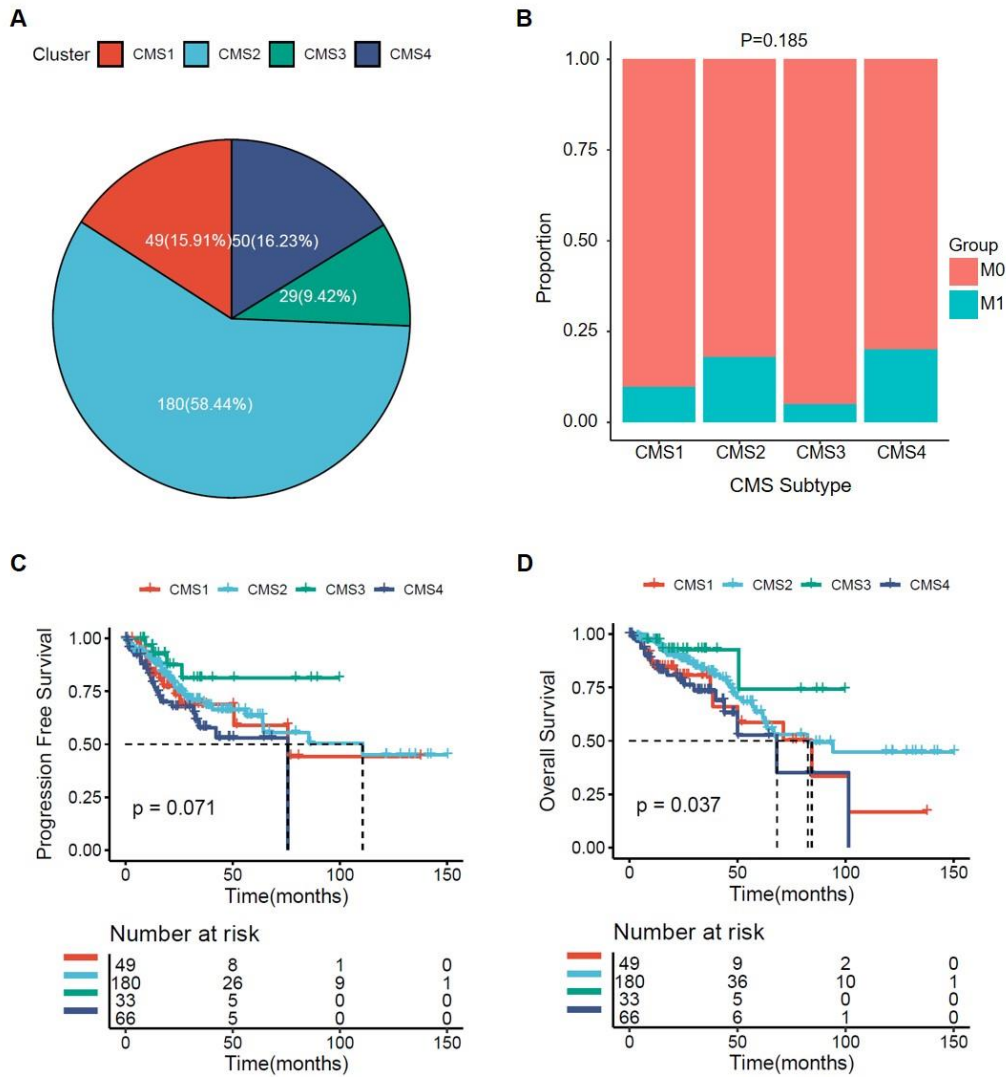

**Supplementary Figure 2. The distribution and survival characteristics of primary CRC with four CMS groups in TCGA database**

A. The proportion of primary CRC with four CMS groups in TCGA database. B. The proportion of distant metastasis (M0 or M1) in primary CRC with four CMS groups. C. Relapse-free survival (RFS) of primary CRC with four CMS groups by Kaplan-Meier analysis and log-rank test. D. Overall survival (OS) of primary CRC with four CMS groups by Kaplan-Meier analysis and log-rank test. Specific p values were indicated in the figure.

## Supplementary Tables

**Supplementary Table 1. The source and numbers of downloaded samples from TCGA and GEO databases.**

| Database     | Series accession | Sample number | Normal colon | Primary tumor | Metastatic tumor                 | Normal tissue      | Primary-Mets pairs included       |
|--------------|------------------|---------------|--------------|---------------|----------------------------------|--------------------|-----------------------------------|
| GEO          | GSE39582         | 585           | 19           | 566           | 0                                | 0                  | None paired                       |
| GEO          | GSE26571         | 32            | 5            | 12            | 9 lymph nodes, 2 livers          | 0                  | 8 lymph node pairs, 2 liver pairs |
| GEO          | GSE68468         | 390           | 55           | 195           | 47 livers, 20 lungs              | 10 livers, 7 lungs | 5 liver pairs                     |
| GEO          | GSE131418        | 1135          | 0            | 878           | 197 livers, 60 lungs             | 0                  | None paired                       |
| GEO          | GSE147971        | 17            | 0            | 3             | 14 peritoneum                    | 0                  | 3 peritoneum pairs                |
| GEO          | GSE41568         | 133           | 0            | 39            | 80 livers, 8 lungs, 5 peritoneum | 0                  | None paired                       |
| GEO          | GSE6988          | 123           | 28           | 53            | 29 livers                        | 0                  | 13 liver pairs                    |
| GEO          | GSE62321         | 57            | 18           | 20            | 19 livers                        | 0                  | 13 liver pairs                    |
| GEO          | GSE3964          | 60            | 12           | 18            | 30 livers                        | 0                  | 6 liver pairs                     |
| GEO          | GSE35834         | 158           | 23           | 30            | 27 livers                        | 0                  | 17 liver pairs                    |
| GEO          | GSE40367         | 61            | 0            | 8             | 7 livers                         | 0                  | 7 liver pairs                     |
| GEO          | GSE49355         | 57            | 18           | 20            | 19 livers                        | 0                  | 13 liver pairs                    |
| GEO          | GSE81558         | 51            | 9            | 23            | 19 livers                        | 4 peritoneum       | 18 liver pairs                    |
| TCGA         | -                | 427           | 51           | 376           | 0                                | 0                  | -                                 |
| <b>Total</b> |                  | 3286          | 238          | 2241          | 592                              | 21                 | 105 pairs                         |

Mets, Metastatic tumors.

**Supplementary Table 2. Data of cBioportal samples.**

| <b>PATIENT ID</b> | <b>VITAL STATUS</b> | <b>OS STATUS</b> | <b>OS MONTHS</b> | <b>PATIENTGRADE</b> | <b>FIRST SITE METS</b> |
|-------------------|---------------------|------------------|------------------|---------------------|------------------------|
| P-0000119         | Deceased            | 1                | 27.37            | Mod                 | Liver                  |
| P-0000241         | Deceased            | 1                | 24               | Mod-Poorly          | Liver                  |
| P-0000493         | Deceased            | 1                | 23.87            |                     | Liver                  |
| P-0000511         | Deceased            | 1                | 23.27            | Poorly              | Ovary                  |
| P-0000520         | Living              | 0                | 41.5             | Mod-Poorly          | Peritoneum             |
| P-0000526         | Living              | 0                | 85.97            | Mod                 | Liver                  |
| P-0000552         | Deceased            | 1                | 16               |                     | Liver                  |
| P-0000561         | Living              | 0                | 7.87             |                     | Peritoneum             |
| P-0000562         | Living              | 0                | 37.33            | Mod                 | Peritoneum             |
| P-0000616         | Deceased            | 1                | 19.43            | Mod                 | Lymph node             |
| P-0000616         | Deceased            | 1                | 19.43            | Mod                 | Lymph node             |
| P-0000625         | Deceased            | 1                | 16.77            |                     | Liver                  |
| P-0000635         | Deceased            | 1                | 29.17            |                     | Lung                   |
| P-0000674         | Deceased            | 1                | 22.27            |                     | Liver                  |
| P-0000675         | Living              | 0                | 40.77            | Mod                 | unknown                |
| P-0000678         | Deceased            | 1                | 36.53            | Mod                 | Peritoneum             |
| P-0000682         | Living              | 0                | 48.3             |                     | Lymph node             |
| P-0000687         | Living              | 0                | 43.07            | Mod                 | Lung                   |
| P-0000695         | Deceased            | 1                | 28.8             | Poorly              | Liver                  |
| P-0000699         | Living              | 0                | 57.5             | Mod                 | Liver                  |
| P-0000703         | Deceased            | 1                | 31.67            |                     | Peritoneum             |
| P-0000714         | Deceased            | 1                | 13.67            | Mod-Poorly          | Liver                  |
| P-0000721         | Deceased            | 1                | 23.3             | Poorly              | Liver                  |
| P-0000736         | Living              | 0                | 48.5             | Mod                 | Liver                  |
| P-0000737         | Deceased            | 1                | 69.8             | Mod                 | Liver                  |
| P-0000738         | Living              | 0                | 54.17            | Mod                 | Liver                  |
| P-0000739         | Living              | 0                | 73.53            | Mod                 | Liver                  |
| P-0000739         | Living              | 0                | 73.53            | Mod                 | Liver                  |
| P-0000742         | Living              | 0                | 54.63            | Mod                 | Liver                  |
| P-0000744         | Deceased            | 1                | 64.27            | Mod                 | Liver                  |
| P-0000745         | Deceased            | 1                | 49.67            | Mod                 | unknown                |
| P-0000754         | Deceased            | 1                | 23.03            | Mod                 | Liver                  |
| P-0000757         | Deceased            | 1                | 13.53            |                     | Lymph node             |
| P-0000762         | Living              | 0                | 65.5             | Mod                 | Liver                  |
| P-0000763         | Deceased            | 1                | 38.73            | Mod                 | Liver                  |
| P-0000769         | Living              | 0                | 125.53           | Mod                 | Liver                  |
| P-0000772         | Deceased            | 1                | 61.03            |                     | Lung                   |
| P-0000777         | Living              | 0                | 96.87            | Mod                 | Liver                  |
| P-0000788         | Deceased            | 1                | 15.8             |                     | Liver                  |
| P-0000798         | Living              | 0                | 72.17            |                     | Liver                  |
| P-0000802         | Living              | 0                | 164.4            | Mod                 | Liver                  |
| P-0000827         | Deceased            | 1                | 26.2             | Mod                 | Liver                  |
| P-0000843         | Living              | 0                | 180.17           |                     | Liver                  |
| P-0000854         | Living              | 0                | 45.1             | Mod                 | Liver                  |
| P-0000860         | Living              | 0                | 104.07           | Mod                 | Liver                  |

|           |          |   |        |            |            |
|-----------|----------|---|--------|------------|------------|
| P-0000862 | Deceased | 1 | 33     | Mod-Poorly | Liver      |
| P-0000868 | Living   | 0 | 123.43 | Mod        | Liver      |
| P-0000869 | Living   | 0 | 62.07  | Mod        | Liver      |
| P-0000874 | Living   | 0 | 36.7   |            | Brain      |
| P-0000885 | Living   | 0 | 49.9   | Mod        | Liver      |
| P-0000911 | Deceased | 1 | 30.57  | Mod        | Liver      |
| P-0000933 | Deceased | 1 | 31.17  | Mod        | Liver      |
| P-0000940 | Deceased | 1 | 84.53  | Mod        | unknown    |
| P-0000979 | Deceased | 1 | 14.77  | Mod        | Liver      |
| P-0000982 | Deceased | 1 | 10.6   |            | Liver      |
| P-0000982 | Deceased | 1 | 10.6   |            | Liver      |
| P-0000988 | Deceased | 1 | 29.83  |            | Liver      |
| P-0000994 | Deceased | 1 | 30.27  |            | Liver      |
| P-0000997 | Deceased | 1 | 31.5   | Mod        | Peritoneum |
| P-0000997 | Deceased | 1 | 31.5   | Mod        | Peritoneum |
| P-0001017 | Deceased | 1 | 42.83  |            | Liver      |
| P-0001020 | Living   | 0 | 4.8    |            | Peritoneum |
| P-0001054 | Living   | 0 | 36.77  | Poorly     | Liver      |
| P-0001054 | Living   | 0 | 36.77  | Poorly     | Liver      |
| P-0001079 | Deceased | 1 | 36.53  | Mod        | Liver      |
| P-0001104 | Deceased | 1 | 31.6   |            | Liver      |
| P-0001104 | Deceased | 1 | 31.6   |            | Liver      |
| P-0001104 | Deceased | 1 | 31.6   |            | Liver      |
| P-0001104 | Deceased | 1 | 31.6   |            | Liver      |
| P-0001150 | Deceased | 1 | 45.8   | Mod        | Ovary      |
| P-0001151 | Deceased | 1 | 25.43  | Mod-Poorly | Peritoneum |
| P-0001170 | Deceased | 1 | 28.4   | Poorly     | Liver      |
| P-0001190 | Deceased | 1 | 58.33  | Mod        | unknown    |
| P-0001192 | Living   | 0 | 82.2   |            | Liver      |
| P-0001200 | Living   | 0 | 45.37  | Mod        | Liver      |
| P-0001215 | Living   | 0 | 31.6   |            | Liver      |
| P-0001227 | Deceased | 1 | 29.87  |            | Liver      |
| P-0001237 | Living   | 0 | 115.7  | Mod-Poorly | Liver      |
| P-0001287 | Deceased | 1 | 21.97  | Mod        | Liver      |
| P-0001289 | Living   | 0 | 61.13  | Mod        | unknown    |
| P-0001295 | Deceased | 1 | 69.97  |            | Lung       |
| P-0001302 | Deceased | 1 | 42.83  | Mod        | unknown    |
| P-0001316 | Living   | 0 | 40.47  | Mod        | Lymph node |
| P-0001317 | Living   | 0 | 35.07  | Mod        | Liver      |
| P-0001318 | Deceased | 1 | 37.97  |            | Lymph node |
| P-0001346 | Deceased | 1 | 8.83   | Poorly     | Liver      |
| P-0001347 | Living   | 0 | 42.97  | Mod        | Liver      |
| P-0001391 | Living   | 0 | 41.33  | Mod        | Liver      |
| P-0001394 | Living   | 0 | 6.4    | Mod-Poorly | Liver      |
| P-0001424 | Deceased | 1 | 14.27  |            | Liver      |
| P-0001424 | Deceased | 1 | 14.27  |            | Liver      |
| P-0001427 | Deceased | 1 | 16.9   | Mod        | Liver      |
| P-0001428 | Deceased | 1 | 133.93 |            | Liver      |

|           |          |   |       |            |            |
|-----------|----------|---|-------|------------|------------|
| P-0001459 | Living   | 0 | 34.63 |            | Lung       |
| P-0001469 | Living   | 0 | 17.57 | Mod-Poorly | Liver      |
| P-0001470 | Deceased | 1 | 27.93 | Mod        | Liver      |
| P-0001472 | Living   | 0 | 34.67 | Mod        | Peritoneum |
| P-0001494 | Living   | 0 | 18.4  |            | Lymph node |
| P-0001499 | Deceased | 1 | 17.27 |            | Lymph node |
| P-0001500 | Deceased | 1 | 36.47 | Mod-Poorly | Liver      |
| P-0001500 | Deceased | 1 | 36.47 | Mod-Poorly | Liver      |
| P-0001500 | Deceased | 1 | 36.47 | Mod-Poorly | Liver      |
| P-0001525 | Living   | 0 | 48.4  | Mod        | Liver      |
| P-0001531 | Living   | 0 | 35.93 | Mod        | Liver      |
| P-0001534 | Deceased | 1 | 36.9  | Mod        | Liver      |
| P-0001554 | Living   | 0 | 55.43 | Mod        | Liver      |
| P-0001577 | Deceased | 1 | 45.13 | Mod        | Liver      |
| P-0001640 | Living   | 0 | 36.5  | Mod        | Pancreas   |
| P-0001640 | Living   | 0 | 36.5  | Mod        | Pancreas   |
| P-0001647 | Deceased | 1 | 32.7  | Mod        | Liver      |
| P-0001649 | Deceased | 1 | 3.87  |            | Peritoneum |
| P-0001658 | Deceased | 1 | 14.5  | Mod-Poorly | Liver      |
| P-0001662 | Deceased | 1 | 16.07 | Poorly     | Lung       |
| P-0001670 | Living   | 0 | 13.17 | Mod-Poorly | unknown    |
| P-0001673 | Living   | 0 | 31    | Mod        | unknown    |
| P-0001676 | Deceased | 1 | 11.33 | Mod        | Peritoneum |
| P-0001685 | Living   | 0 | 14.87 |            | unknown    |
| P-0001685 | Living   | 0 | 14.87 |            | unknown    |
| P-0001690 | Living   | 0 | 35.2  | Mod        | Liver      |
| P-0001693 | Deceased | 1 | 18.73 | Mod        | Liver      |
| P-0001702 | Deceased | 1 | 32.07 | Mod        | Liver      |
| P-0001729 | Deceased | 1 | 24.57 |            | Liver      |
| P-0001732 | Deceased | 1 | 27.7  | Mod        | Liver      |
| P-0001734 | Deceased | 1 | 10    |            | Liver      |
| P-0001742 | Deceased | 1 | 63.93 | Mod        | Liver      |
| P-0001746 | Deceased | 1 | 108.8 | Mod        | Lung       |
| P-0001754 | Deceased | 1 | 35.57 |            | Liver      |
| P-0001761 | Living   | 0 | 33.6  |            | Liver      |
| P-0001767 | Living   | 0 | 35.87 | Mod        | Lung       |
| P-0001769 | Living   | 0 | 35.4  | Mod        | Liver      |
| P-0001771 | Deceased | 1 | 45.57 | Mod-Poorly | Lymph node |
| P-0001778 | Deceased | 1 | 39.97 | Mod        | Liver      |
| P-0001807 | Deceased | 1 | 87.87 |            | Lung       |
| P-0001808 | Living   | 0 | 56.47 | Mod        | Lymph node |
| P-0001864 | Deceased | 1 | 24.7  | Mod        | Lung       |
| P-0001867 | Deceased | 1 | 43.5  |            | Peritoneum |
| P-0001909 | Living   | 0 | 115.3 | Mod        | Liver      |
| P-0001913 | Living   | 0 | 31.33 | Mod        | unknown    |
| P-0001913 | Living   | 0 | 31.33 | Mod        | unknown    |
| P-0001923 | Living   | 0 | 36.6  | Mod        | Liver      |
| P-0001940 | Living   | 0 | 27.67 | Mod        | Liver      |

|           |          |   |       |            |             |
|-----------|----------|---|-------|------------|-------------|
| P-0001949 | Deceased | 1 | 91.77 | Mod-Poorly | unknown     |
| P-0001961 | Deceased | 1 | 57.73 | Mod        | Liver       |
| P-0001961 | Deceased | 1 | 57.73 | Mod        | Liver       |
| P-0001964 | Deceased | 1 | 41    | Mod        | Liver       |
| P-0001984 | Living   | 0 | 97.6  | Mod        | Liver       |
| P-0002025 | Deceased | 1 | 16.33 | Mod        | Lymph node  |
| P-0002032 | Living   | 0 | 53.63 |            | Liver       |
| P-0002035 | Living   | 0 | 8.5   | Mod        | unknown     |
| P-0002042 | Deceased | 1 | 24.57 | Mod        | Liver       |
| P-0002048 | Deceased | 1 | 21.9  |            | Liver       |
| P-0002049 | Living   | 0 | 34.2  |            | Liver       |
| P-0002057 | Deceased | 1 | 56.93 | Poorly     | Peritoneum  |
| P-0002068 | Living   | 0 | 41.4  | Mod        | Lung        |
| P-0002070 | Deceased | 1 | 18.23 |            | Liver       |
| P-0002078 | Deceased | 1 | 8.43  |            | Peritoneum  |
| P-0002080 | Deceased | 1 | 35.9  |            | Liver       |
| P-0002095 | Living   | 0 | 40.2  | Mod        | Liver       |
| P-0002102 | Deceased | 1 | 18.73 |            | Liver       |
| P-0002154 | Living   | 0 | 38.17 | Mod-Poorly | Lymph node  |
| P-0002155 | Deceased | 1 | 9.37  |            | Liver       |
| P-0002164 | Living   | 0 | 31.23 | Mod        | unknown     |
| P-0002235 | Deceased | 1 | 32.9  | Mod        | Liver       |
| P-0002251 | Living   | 0 | 43.73 | Mod        | Liver       |
| P-0002268 | Living   | 0 | 37.63 | Mod        | Liver       |
| P-0002291 | Deceased | 1 | 42.6  | Mod        | Liver       |
| P-0002321 | Living   | 0 | 9.3   |            | unknown     |
| P-0002323 | Deceased | 1 | 20.5  |            | Liver       |
| P-0002327 | Deceased | 1 | 13.37 | Mod        | Liver       |
| P-0002339 | Deceased | 1 | 11.7  |            | Liver       |
| P-0002343 | Deceased | 1 | 37.3  | Mod        | Liver       |
| P-0002395 | Deceased | 1 | 16.33 |            | Peritoneum  |
| P-0002407 | Living   | 0 | 0.93  | Poorly     | Lymph node  |
| P-0002413 | Living   | 0 | 35.3  | Mod        | Liver       |
| P-0002438 | Deceased | 1 | 30.73 | Mod        | Liver       |
| P-0002442 | Living   | 0 | 35.47 | Mod-Poorly | Liver       |
| P-0002455 | Deceased | 1 | 5.47  | Poorly     | Small Bowel |
| P-0002463 | Deceased | 1 | 17.7  | Mod-Poorly | Peritoneum  |
| P-0002463 | Deceased | 1 | 17.7  | Mod-Poorly | Peritoneum  |
| P-0002475 | Living   | 0 | 26.47 | Mod        | Lung        |
| P-0002487 | Deceased | 1 | 1.67  | Poorly     | Liver       |
| P-0002488 | Deceased | 1 | 65.27 | Mod        | Lymph node  |
| P-0002512 | Deceased | 1 | 20.67 | Mod        | Bone        |
| P-0002529 | Deceased | 1 | 53.07 | Mod-Poorly | Liver       |
| P-0002540 | Deceased | 1 | 18.43 |            | Liver       |
| P-0002542 | Deceased | 1 | 31.77 | Poorly     | Liver       |
| P-0002547 | Living   | 0 | 33.03 | Mod        | unknown     |
| P-0002563 | Living   | 0 | 23.4  | Mod        | Lung        |
| P-0002565 | Living   | 0 | 96.07 | Mod        | Liver       |



|           |          |   |        |            |             |
|-----------|----------|---|--------|------------|-------------|
| P-0002653 | Deceased | 1 | 13.5   | Poorly     | Peritoneum  |
| P-0002665 | Deceased | 1 | 4.7    |            | Liver       |
| P-0002670 | Living   | 0 | 66.67  | Mod        | Liver       |
| P-0002671 | Deceased | 1 | 5.97   |            | Liver       |
| P-0002673 | Living   | 0 | 49.87  | Mod        | Peritoneum  |
| P-0002678 | Deceased | 1 | 2.53   | Poorly     | Lymph node  |
| P-0002702 | Deceased | 1 | 71.93  | Mod-Poorly | Liver       |
| P-0002721 | Living   | 0 | 63.83  | Mod-Poorly | Liver       |
| P-0002724 | Living   | 0 | 32.17  | Mod        | Liver       |
| P-0002728 | Living   | 0 | 33.6   | Poorly     | Liver       |
| P-0002730 | Deceased | 1 | 29.63  | Mod-Poorly | Liver       |
| P-0002752 | Living   | 0 | 34.57  | Mod        | Liver       |
| P-0002769 | Deceased | 1 | 49.93  | Mod        | unknown     |
| P-0002770 | Living   | 0 | 58.13  | Mod        | Liver       |
| P-0002778 | Living   | 0 | 38.17  | Mod-Poorly | Liver       |
| P-0002788 | Deceased | 1 | 9.8    | Poorly     | Liver       |
| P-0002791 | Deceased | 1 | 19.17  | Mod        | Peritoneum  |
| P-0002792 | Living   | 0 | 34.6   | Mod        | Liver       |
| P-0002795 | Deceased | 1 | 17.27  |            | Liver       |
| P-0002804 | Living   | 0 | 33.97  | Mod        | Liver       |
| P-0002814 | Living   | 0 | 121.13 | Mod        | unknown     |
| P-0002835 | Deceased | 1 | 68.13  | Mod        | Liver       |
| P-0002852 | Deceased | 1 | 24.7   | Poorly     | Lung        |
| P-0002855 | Deceased | 1 | 26.37  |            | Liver       |
| P-0002878 | Living   | 0 | 32.93  | Mod        | Soft Tissue |
| P-0002884 | Deceased | 1 | 14.53  |            | Lung        |
| P-0002902 | Living   | 0 | 30.57  | Mod        | Lung        |
| P-0002951 | Living   | 0 | 33.5   | Mod        | Liver       |
| P-0002960 | Deceased | 1 | 28.53  |            | Lung        |
| P-0002994 | Living   | 0 | 30.77  | Poorly     | Pelvis      |
| P-0003011 | Living   | 0 | 30.57  | Mod        | unknown     |
| P-0003035 | Deceased | 1 | 25.7   |            | Peritoneum  |
| P-0003046 | Living   | 0 | 51.2   | Mod        | Liver       |
| P-0003077 | Deceased | 1 | 39.77  |            | Liver       |
| P-0003110 | Living   | 0 | 78.9   | Mod        | Lung        |
| P-0003124 | Deceased | 1 | 7.73   |            | Liver       |
| P-0003130 | Deceased | 1 | 12.9   |            | Lung        |
| P-0003136 | Living   | 0 | 35.5   |            | Liver       |
| P-0003154 | Deceased | 1 | 16.9   | Poorly     | Lymph node  |
| P-0003183 | Living   | 0 | 31.87  | Poorly     | Lymph node  |
| P-0003184 | Deceased | 1 | 30.37  | Mod        | Lung        |
| P-0003209 | Living   | 0 | 33.23  |            | Liver       |
| P-0003210 | Living   | 0 | 30.4   | Mod        | Lung        |
| P-0003211 | Living   | 0 | 31.33  | Mod        | Ovary       |
| P-0003254 | Living   | 0 | 25.07  | Mod        | Pelvis      |
| P-0003258 | Living   | 0 | 28.8   |            | Lung        |
| P-0003284 | Living   | 0 | 26.4   | Mod        | Liver       |
| P-0003285 | Living   | 0 | 34.93  | Mod        | unknown     |

|           |          |   |           |            |             |
|-----------|----------|---|-----------|------------|-------------|
| P-0003298 | Living   | 0 | 15.43     | Mod        | Liver       |
| P-0003301 | Deceased | 1 | 11.7      | Mod        | Lung        |
| P-0003308 | Living   | 0 | 30.67     | Mod        | Ovary       |
| P-0003348 | Living   | 0 | 105.2     | Mod        | Liver       |
| P-0003365 | Living   | 0 | 41.27     | Mod        | Liver       |
| P-0003397 | Living   | 0 | 74.83     |            | Lung        |
| P-0003437 | Living   | 0 | 40.93     | Mod        | Lung        |
| P-0003474 | Deceased | 1 | 18.2      | Mod        | Liver       |
| P-0003475 | Deceased | 1 | 34.33     | Mod        | Liver       |
| P-0003483 | Deceased | 1 | 5.87      |            | Liver       |
| P-0003499 | Deceased | 1 | 1.9       |            | Liver       |
| P-0003501 | Deceased | 1 | 27.17     |            | Liver       |
| P-0003510 | Living   | 0 | 30.9      | Mod        | Pelvis      |
| P-0003513 | Living   | 0 | 74.5      | Mod        | unknown     |
| P-0003514 | Deceased | 1 | 5.73      | Mod        | Liver       |
| P-0003518 | Deceased | 1 | 41.9      | Mod        | Liver       |
| P-0003575 | Living   | 0 | 25.37     | Mod-Poorly | unknown     |
| P-0003582 | Living   | 0 | 21.13     | Mod-Poorly | Liver       |
| P-0003611 | Living   | 0 | 14.43     | Mod-Poorly | Lymph node  |
| P-0003662 | Deceased | 1 | 20.7      | Mod-Poorly | Liver       |
| P-0003710 | Living   | 0 | 56.9      | Mod        | Liver       |
| P-0003717 | Living   | 0 | 28.2      | Mod-Poorly | Ovary       |
| P-0003720 | Deceased | 1 | 13.5      | Mod        | Liver       |
| P-0003725 | Deceased | 1 | 29.07     | Mod        | unknown     |
| P-0003753 | Deceased | 1 | 6.17      |            | Liver       |
| P-0003755 | Deceased | 1 | 24.33     |            | Liver       |
| P-0003756 | Deceased | 1 | 18.1      | Mod        | Pelvis      |
| P-0003774 | Living   | 0 | 7.13      | Mod        | Pelvis      |
| P-0003780 | Living   | 0 | 15.4      | Mod        | Liver       |
| P-0003789 | Living   | 0 | 33.4      | Mod        | Liver       |
| P-0003791 | Deceased | 1 | 22.9      |            | Liver       |
| P-0003793 | Living   | 0 | 30.73     | Mod        | Liver       |
| P-0003796 | Living   | 0 | 70.066667 | Poorly     | unknown     |
| P-0003807 | Living   | 0 | 11        | Mod        | unknown     |
| P-0003839 | Deceased | 1 | 38.5      | Mod        | Liver       |
| P-0003886 | Living   | 0 | 30.6      | Poorly     | Liver       |
| P-0003890 | Deceased | 1 | 14.63     | Mod        | Liver       |
| P-0003901 | Living   | 0 | 22.1      | Mod        | Liver       |
| P-0003990 | Living   | 0 | 35.77     | Mod        | Liver       |
| P-0003999 | Living   | 0 | 30.8      | Mod        | Liver       |
| P-0004007 | Living   | 0 | 8.33      |            | Small Bowel |
| P-0004007 | Living   | 0 | 8.33      |            | Small Bowel |
| P-0004010 | Deceased | 1 | 28.43     | Mod        | Lung        |
| P-0004011 | Living   | 0 | 90.43     | Mod        | Peritoneum  |
| P-0004018 | Deceased | 1 | 25.87     | Mod        | Liver       |
| P-0004051 | Living   | 0 | 30.5      | Mod-Poorly | Peritoneum  |
| P-0004072 | Deceased | 1 | 25.93     |            | Liver       |
| P-0004081 | Living   | 0 | 28.5      |            | Liver       |

|           |          |   |           |            |             |
|-----------|----------|---|-----------|------------|-------------|
| P-0004083 | Living   | 0 | 45.266667 | Mod        | unknown     |
| P-0004140 | Deceased | 1 | 45.73     | Mod        | Liver       |
| P-0004140 | Deceased | 1 | 45.73     | Mod        | Liver       |
| P-0004140 | Deceased | 1 | 45.73     | Mod        | Liver       |
| P-0004159 | Deceased | 1 | 55.47     |            | Lung        |
| P-0004172 | Deceased | 1 | 15.93     |            | Liver       |
| P-0004220 | Deceased | 1 | 34.13     |            | Liver       |
| P-0004249 | Deceased | 1 | 19.43     |            | Liver       |
| P-0004251 | Deceased | 1 | 11.5      | Mod        | Liver       |
| P-0004322 | Living   | 0 | 42.73     | Mod        | Liver       |
| P-0004323 | Living   | 0 | 29.67     | Mod        | Liver       |
| P-0004350 | Deceased | 1 | 41.87     | Mod        | Liver       |
| P-0004362 | Living   | 0 | 35.43     |            | unknown     |
| P-0004363 | Deceased | 1 | 24.67     | Mod        | Liver       |
| P-0004369 | Living   | 0 | 30.07     | Mod        | unknown     |
| P-0004401 | Living   | 0 | 8.03      | Poorly     | Peritoneum  |
| P-0004402 | Living   | 0 | 19.03     |            | Liver       |
| P-0004403 | Living   | 0 | 31.07     | Mod        | Lung        |
| P-0004431 | Living   | 0 | 24.4      | Mod        | unknown     |
| P-0004441 | Living   | 0 | 24.2      | Mod-Poorly | unknown     |
| P-0004454 | Living   | 0 | 26.27     | Mod        | Peritoneum  |
| P-0004486 | Living   | 0 | 39.43     |            | Lung        |
| P-0004494 | Living   | 0 | 31.33     | Mod        | Liver       |
| P-0004502 | Deceased | 1 | 3.47      |            | Liver       |
| P-0004511 | Living   | 0 | 33.43     | Mod        | Liver       |
| P-0004549 | Deceased | 1 | 7.7       | Poorly     | Peritoneum  |
| P-0004566 | Living   | 0 | 33.9      | Mod        | Lung        |
| P-0004602 | Living   | 0 | 89.566667 | Mod        | unknown     |
| P-0004608 | Deceased | 1 | 13.93     | Mod        | Liver       |
| P-0004624 | Living   | 0 | 17.07     | Mod        | Peritoneum  |
| P-0004626 | Deceased | 1 | 18.73     | Poorly     | Liver       |
| P-0004629 | Deceased | 1 | 50.27     | Mod        | Liver       |
| P-0004652 | Deceased | 1 | 3.43      |            | Liver       |
| P-0004666 | Deceased | 1 | 75.8      | Mod        | Liver       |
| P-0004673 | Deceased | 1 | 21.37     | Poorly     | unknown     |
| P-0004679 | Deceased | 1 | 13.63     | Poorly     | Liver       |
| P-0004690 | Living   | 0 | 29.6      | Mod        | Liver       |
| P-0004692 | Living   | 0 | 30.83     | Mod        | Small Bowel |
| P-0004697 | Living   | 0 | 34.8      | Mod        | Liver       |
| P-0004698 | Living   | 0 | 29.2      | Mod        | Liver       |
| P-0004716 | Living   | 0 | 21.2      | Mod        | Liver       |
| P-0004736 | Living   | 0 | 37.3      | Mod        | Adnexa      |
| P-0004738 | Living   | 0 | 36.766667 | Mod        | unknown     |
| P-0004754 | Living   | 0 | 67.17     | Mod        | Liver       |
| P-0004775 | Deceased | 1 | 46.7      | Mod        | Liver       |
| P-0004781 | Deceased | 1 | 56.5      | Mod        | Liver       |
| P-0004783 | Living   | 0 | 18.9      | Mod        | Peritoneum  |
| P-0004786 | Living   | 0 | 38.67     | Mod        | Lung        |

|           |          |   |           |            |            |
|-----------|----------|---|-----------|------------|------------|
| P-0004792 | Living   | 0 | 58.47     | Mod        | unknown    |
| P-0004795 | Living   | 0 | 8.97      |            | Peritoneum |
| P-0004798 | Deceased | 1 | 12.03     | Mod        | Peritoneum |
| P-0004803 | Living   | 0 | 31.43     |            | Liver      |
| P-0004823 | Deceased | 1 | 26.77     | Mod        | Lung       |
| P-0004834 | Deceased | 1 | 99.83     |            | Liver      |
| P-0004844 | Living   | 0 | 23.83     | Mod        | Liver      |
| P-0004845 | Living   | 0 | 11.53     |            | unknown    |
| P-0004862 | Living   | 0 | 0.57      |            | Liver      |
| P-0004865 | Living   | 0 | 29.07     | Mod        | unknown    |
| P-0004872 | Living   | 0 | 44.17     | Mod        | Liver      |
| P-0004886 | Living   | 0 | 47.33     | Poorly     | Ovary      |
| P-0004897 | Living   | 0 | 13.1      |            | Liver      |
| P-0004904 | Living   | 0 | 40.2      |            | Liver      |
| P-0004928 | Living   | 0 | 43.27     |            | Liver      |
| P-0004954 | Living   | 0 | 31.9      | Poorly     | unknown    |
| P-0004957 | Deceased | 1 | 38.87     |            | Liver      |
| P-0004960 | Deceased | 1 | 28.83     | Mod        | Liver      |
| P-0004967 | Living   | 0 | 27.7      | Mod        | Liver      |
| P-0004968 | Living   | 0 | 27.17     | Mod        | unknown    |
| P-0004977 | Deceased | 1 | 75.03     | Mod        | Liver      |
| P-0005003 | Deceased | 1 | 18.2      | Mod        | Liver      |
| P-0005011 | Deceased | 1 | 10.03     |            | Liver      |
| P-0005016 | Living   | 0 | 29.93     | Mod        | Liver      |
| P-0005025 | Living   | 0 | 5.73      | Mod        | Liver      |
| P-0005029 | Deceased | 1 | 19.9      | Mod        | Liver      |
| P-0005091 | Living   | 0 | 33.9      |            | Liver      |
| P-0005102 | Living   | 0 | 13.77     |            | Peritoneum |
| P-0005103 | Deceased | 1 | 12.13     | Mod        | Liver      |
| P-0005124 | Deceased | 1 | 17        | Mod-Poorly | Liver      |
| P-0005132 | Living   | 0 | 67.33     | Mod        | Liver      |
| P-0005137 | Deceased | 1 | 31.33     | Mod        | Peritoneum |
| P-0005151 | Living   | 0 | 58.07     |            | Peritoneum |
| P-0005163 | Living   | 0 | 28.83     |            | Liver      |
| P-0005164 | Living   | 0 | 32.6      | Mod        | Liver      |
| P-0005172 | Living   | 0 | 4.47      |            | Bone       |
| P-0005189 | Living   | 0 | 18.63     | Mod        | Peritoneum |
| P-0005197 | Living   | 0 | 29.5      | Poorly     | unknown    |
| P-0005200 | Living   | 0 | 15.23     | Mod        | unknown    |
| P-0005207 | Deceased | 1 | 23.37     | Mod        | Lung       |
| P-0005210 | Living   | 0 | 32.9      | Mod        | Lung       |
| P-0005230 | Living   | 0 | 51.366667 | Poorly     | unknown    |
| P-0005237 | Living   | 0 | 137.33    | Mod        | Liver      |
| P-0005240 | Living   | 0 | 126       |            | Lymph node |
| P-0005247 | Living   | 0 | 27.07     | Mod        | Lymph node |
| P-0005298 | Living   | 0 | 28.27     | Mod        | unknown    |
| P-0005307 | Living   | 0 | 37.2      | Mod        | Peritoneum |
| P-0005311 | Deceased | 1 | 13.5      | Mod-Poorly | unknown    |

|           |          |   |           |            |            |
|-----------|----------|---|-----------|------------|------------|
| P-0005311 | Deceased | 1 | 13.5      | Mod-Poorly | unknown    |
| P-0005326 | Living   | 0 | 55.766667 |            | unknown    |
| P-0005327 | Deceased | 1 | 28.7      | Mod-Poorly | Lung       |
| P-0005343 | Living   | 0 | 18.53     | Poorly     | Liver      |
| P-0005381 | Living   | 0 | 6.7       |            | Liver      |
| P-0005384 | Living   | 0 | 49.87     | Mod        | Ovary      |
| P-0005430 | Living   | 0 | 26.67     | Mod-Poorly | Liver      |
| P-0005439 | Deceased | 1 | 34.23     | Poorly     | Liver      |
| P-0005443 | Living   | 0 | 41.53     | Poorly     | unknown    |
| P-0005446 | Deceased | 1 | 23.87     |            | Liver      |
| P-0005455 | Living   | 0 | 57.366667 | Mod        | unknown    |
| P-0005487 | Deceased | 1 | 31.066667 | Mod-Poorly | Peritoneum |
| P-0005502 | Living   | 0 | 46.23     | Mod        | Liver      |
| P-0005522 | Living   | 0 | 106.47    | Mod-Poorly | Liver      |
| P-0005528 | Living   | 0 | 30.23     | Mod        | Lymph node |
| P-0005529 | Deceased | 1 | 8.23      |            | Liver      |
| P-0005548 | Living   | 0 | 29.866667 | Mod-Poorly | unknown    |
| P-0005560 | Living   | 0 | 31.066667 | Mod        | unknown    |
| P-0005569 | Living   | 0 | 14.43     | Mod        | Liver      |
| P-0005589 | Living   | 0 | 38.47     | Mod        | Liver      |
| P-0005591 | Living   | 0 | 29.97     | Mod        | unknown    |
| P-0005622 | Living   | 0 | 36.27     | Mod        | Pelvis     |
| P-0005623 | Living   | 0 | 27.93     | Mod        | Liver      |
| P-0005634 | Deceased | 1 | 31.3      |            | Liver      |
| P-0005670 | Living   | 0 | 6.03      | Poorly     | Peritoneum |
| P-0005715 | Living   | 0 | 28.37     | Mod        | Liver      |
| P-0005730 | Living   | 0 | 46.87     |            | Liver      |
| P-0005739 | Living   | 0 | 38.87     |            | Liver      |
| P-0005742 | Deceased | 1 | 24.73     | Mod-Poorly | Liver      |
| P-0005755 | Living   | 0 | 20.9      | Mod        | Jejunum    |
| P-0005762 | Living   | 0 | 57.1      |            | Liver      |
| P-0005776 | Deceased | 1 | 59.93     |            | Liver      |
| P-0005788 | Deceased | 1 | 12.07     | Poorly     | Liver      |
| P-0005801 | Living   | 0 | 33.6      | Mod        | Liver      |
| P-0005823 | Living   | 0 | 24.13     |            | Peritoneum |
| P-0005824 | Living   | 0 | 26.87     | Poorly     | unknown    |
| P-0005829 | Living   | 0 | 3.67      | Mod-Poorly | Peritoneum |
| P-0005833 | Deceased | 1 | 48.93     | Mod        | Peritoneum |
| P-0005853 | Deceased | 1 | 8.5       | Mod        | Liver      |
| P-0005858 | Living   | 0 | 26.47     |            | Liver      |
| P-0005865 | Living   | 0 | 12.63     |            | Liver      |
| P-0005888 | Deceased | 1 | 12.9      |            | Liver      |
| P-0005908 | Deceased | 1 | 12.43     | Poorly     | Liver      |
| P-0005910 | Living   | 0 | 3         | Mod        | Liver      |
| P-0005938 | Deceased | 1 | 98.37     |            | Liver      |
| P-0005941 | Deceased | 1 | 92.77     | Mod        | Liver      |
| P-0005949 | Living   | 0 | 50.77     | Poorly     | unknown    |
| P-0005961 | Deceased | 1 | 3.83      | Poorly     | Liver      |

|           |          |   |           |            |            |
|-----------|----------|---|-----------|------------|------------|
| P-0005987 | Living   | 0 | 60.9      | Mod        | unknown    |
| P-0005996 | Living   | 0 | 11.7      | Poorly     | Liver      |
| P-0005998 | Deceased | 1 | 31.57     | Mod        | Liver      |
| P-0006000 | Living   | 0 | 26.4      | Mod        | Liver      |
| P-0006023 | Living   | 0 | 26.43     | Mod        | unknown    |
| P-0006050 | Living   | 0 | 26.47     |            | Peritoneum |
| P-0006075 | Living   | 0 | 26.63     | Mod        | Liver      |
| P-0006093 | Living   | 0 | 34.83     |            | Liver      |
| P-0006110 | Deceased | 1 | 12        |            | Liver      |
| P-0006118 | Living   | 0 | 21.87     | Mod-Poorly | Liver      |
| P-0006135 | Living   | 0 | 7.07      | Mod        | Lung       |
| P-0006136 | Deceased | 1 | 23.7      | Mod-Poorly | Lung       |
| P-0006138 | Deceased | 1 | 23.6      | Mod        | Liver      |
| P-0006170 | Living   | 0 | 76        | Mod        | unknown    |
| P-0006181 | Living   | 0 | 4.03      | Mod        | Lymph node |
| P-0006183 | Living   | 0 | 25.7      | Mod-Poorly | Liver      |
| P-0006184 | Living   | 0 | 27.87     |            | unknown    |
| P-0006202 | Deceased | 1 | 3.43      |            | Liver      |
| P-0006207 | Living   | 0 | 28.866667 | Mod        | unknown    |
| P-0006213 | Deceased | 1 | 51.6      | Mod        | Liver      |
| P-0006219 | Living   | 0 | 27.67     | Mod        | Liver      |
| P-0006225 | Deceased | 1 | 24.37     | Mod        | Lung       |
| P-0006230 | Living   | 0 | 32.33     | Mod        | Liver      |
| P-0006261 | Living   | 0 | 99.8      | Mod        | Peritoneum |
| P-0006271 | Deceased | 1 | 34.73     |            | Liver      |
| P-0006272 | Deceased | 1 | 11.37     | Mod        | Lymph node |
| P-0006275 | Living   | 0 | 25.7      | Mod        | Liver      |
| P-0006287 | Deceased | 1 | 72.47     |            | Lung       |
| P-0006306 | Living   | 0 | 26.77     |            | Lung       |
| P-0006316 | Living   | 0 | 11.13     | Mod        | Liver      |
| P-0006317 | Deceased | 1 | 12.5      |            | Liver      |
| P-0006329 | Living   | 0 | 32.07     | Mod        | Liver      |
| P-0006345 | Living   | 0 | 22.8      | Mod        | unknown    |
| P-0006359 | Living   | 0 | 20.27     | Mod        | unknown    |
| P-0006365 | Living   | 0 | 26.366667 | Mod        | unknown    |
| P-0006390 | Deceased | 1 | 31        |            | Liver      |
| P-0006394 | Living   | 0 | 8.9       | Mod        | Liver      |
| P-0006405 | Living   | 0 | 35.23     |            | Liver      |
| P-0006434 | Living   | 0 | 31.57     | Mod        | Peritoneum |
| P-0006444 | Living   | 0 | 16.7      | Mod        | Liver      |
| P-0006460 | Deceased | 1 | 3.17      |            | Liver      |
| P-0006468 | Living   | 0 | 32.5      | Poorly     | Liver      |
| P-0006468 | Living   | 0 | 32.5      | Poorly     | Liver      |
| P-0006469 | Living   | 0 | 21.83     | Mod        | Liver      |
| P-0006512 | Living   | 0 | 27.4      |            | Liver      |
| P-0006548 | Living   | 0 | 10.27     | Poorly     | unknown    |
| P-0006559 | Living   | 0 | 0.67      |            | Liver      |
| P-0006564 | Living   | 0 | 26.7      | Mod        | Liver      |

|           |          |   |        |            |            |
|-----------|----------|---|--------|------------|------------|
| P-0006575 | Living   | 0 | 160.9  | Mod        | Liver      |
| P-0006581 | Living   | 0 | 32.43  | Mod        | Peritoneum |
| P-0006587 | Living   | 0 | 25.87  | Mod-Poorly | Liver      |
| P-0006589 | Living   | 0 | 28.2   |            | Liver      |
| P-0006592 | Living   | 0 | 45.5   | Mod        | Liver      |
| P-0006608 | Living   | 0 | 64.6   | Mod        | Liver      |
| P-0006612 | Living   | 0 | 18.67  | Mod-Poorly | unknown    |
| P-0006616 | Deceased | 1 | 14.23  | Poorly     | Liver      |
| P-0006636 | Deceased | 1 | 11.53  | Mod        | Lung       |
| P-0006646 | Living   | 0 | 38.37  | Mod        | Liver      |
| P-0006647 | Deceased | 1 | 25.53  | Mod        | Liver      |
| P-0006649 | Living   | 0 | 32     |            | Liver      |
| P-0006657 | Deceased | 1 | 34.2   | Mod-Poorly | Liver      |
| P-0006658 | Deceased | 1 | 95.53  | Mod        | Liver      |
| P-0006659 | Deceased | 1 | 58.33  |            | Liver      |
| P-0006669 | Living   | 0 | 8.3    |            | Liver      |
| P-0006680 | Living   | 0 | 22.67  | Mod        | unknown    |
| P-0006681 | Living   | 0 | 128.07 | Mod        | Liver      |
| P-0006683 | Deceased | 1 | 28.5   | Mod        | Liver      |
| P-0006685 | Deceased | 1 | 36.4   | Mod        | Liver      |
| P-0006686 | Living   | 0 | 48.1   | Mod        | Liver      |
| P-0006687 | Living   | 0 | 27.07  | Mod        | Ovary      |
| P-0006693 | Living   | 0 | 23.2   | Mod        | Liver      |
| P-0006701 | Living   | 0 | 31.1   | Mod        | Liver      |
| P-0006704 | Living   | 0 | 29.43  | Mod        | Liver      |
| P-0006706 | Living   | 0 | 127.57 |            | Liver      |
| P-0006707 | Living   | 0 | 45.73  | Mod        | Liver      |
| P-0006708 | Deceased | 1 | 31.33  | Mod        | Liver      |
| P-0006711 | Living   | 0 | 47.27  | Mod        | Liver      |
| P-0006715 | Living   | 0 | 42.1   | Mod        | Liver      |
| P-0006717 | Living   | 0 | 33.3   | Mod        | Liver      |
| P-0006721 | Living   | 0 | 47.47  | Mod        | Liver      |
| P-0006726 | Living   | 0 | 31.5   |            | Liver      |
| P-0006729 | Living   | 0 | 33.73  | Mod        | Liver      |
| P-0006730 | Deceased | 1 | 7.97   | Poorly     | Liver      |
| P-0006735 | Living   | 0 | 39.93  | Mod-Poorly | Liver      |
| P-0006737 | Living   | 0 | 54.73  | Mod        | Liver      |
| P-0006740 | Living   | 0 | 43.7   | Poorly     | Liver      |
| P-0006743 | Living   | 0 | 40.1   | Mod        | Liver      |
| P-0006744 | Living   | 0 | 35.37  |            | Liver      |
| P-0006750 | Living   | 0 | 38.8   |            | Liver      |
| P-0006753 | Living   | 0 | 35.4   |            | Lymph node |
| P-0006758 | Living   | 0 | 52     | Mod        | Lymph node |
| P-0006759 | Living   | 0 | 108.27 | Mod        | Liver      |
| P-0006761 | Living   | 0 | 84.6   | Mod        | Liver      |
| P-0006763 | Living   | 0 | 202.43 | Mod        | Liver      |
| P-0006764 | Living   | 0 | 59.73  |            | Liver      |
| P-0006766 | Living   | 0 | 48.53  | Mod        | Lung       |

|           |          |   |           |            |            |
|-----------|----------|---|-----------|------------|------------|
| P-0006770 | Living   | 0 | 25.17     | Mod-Poorly | Liver      |
| P-0006778 | Living   | 0 | 25.17     | Mod        | Liver      |
| P-0006794 | Living   | 0 | 76.5      | Mod        | Liver      |
| P-0006813 | Living   | 0 | 26        | Mod        | Liver      |
| P-0006816 | Living   | 0 | 20.4      | Mod        | Liver      |
| P-0006819 | Living   | 0 | 98.9      | Mod        | Liver      |
| P-0006819 | Living   | 0 | 98.9      | Mod        | Liver      |
| P-0006821 | Living   | 0 | 62.43     | Mod        | Liver      |
| P-0006822 | Living   | 0 | 92.83     | Poorly     | Liver      |
| P-0006825 | Living   | 0 | 26.47     | Mod        | Peritoneum |
| P-0006835 | Deceased | 1 | 46.9      | Mod        | Liver      |
| P-0006853 | Deceased | 1 | 30.7      | Mod        | Liver      |
| P-0006860 | Deceased | 1 | 15.5      | Mod        | Lung       |
| P-0006861 | Living   | 0 | 34.53     | Mod        | Liver      |
| P-0006863 | Living   | 0 | 25.4      | Mod        | unknown    |
| P-0006864 | Living   | 0 | 24.43     | Mod        | Liver      |
| P-0006865 | Living   | 0 | 22.33     | Poorly     | unknown    |
| P-0006867 | Living   | 0 | 28.63     |            | unknown    |
| P-0006872 | Living   | 0 | 5.13      | Mod        | Peritoneum |
| P-0006887 | Living   | 0 | 15.23     |            | Liver      |
| P-0006888 | Living   | 0 | 34.37     | Poorly     | unknown    |
| P-0006889 | Living   | 0 | 34.97     |            | Lung       |
| P-0006890 | Deceased | 1 | 17.03     |            | Liver      |
| P-0006906 | Living   | 0 | 71.1      |            | Liver      |
| P-0006909 | Living   | 0 | 23.9      | Mod        | unknown    |
| P-0006933 | Deceased | 1 | 70.67     | Mod        | Peritoneum |
| P-0006936 | Deceased | 1 | 108.87    | Mod        | Liver      |
| P-0006960 | Living   | 0 | 38.866667 | Poorly     | unknown    |
| P-0006967 | Living   | 0 | 24.67     | Mod        | Lung       |
| P-0006968 | Living   | 0 | 14.67     | Mod        | Liver      |
| P-0006978 | Living   | 0 | 73.77     | Mod        | Liver      |
| P-0006981 | Deceased | 1 | 24.1      |            | Lung       |
| P-0006983 | Deceased | 1 | 45.57     | Mod        | Liver      |
| P-0006999 | Deceased | 1 | 187.1     | Mod        | unknown    |
| P-0007012 | Deceased | 1 | 28.3      |            | Liver      |
| P-0007035 | Living   | 0 | 64.83     | Mod        | Liver      |
| P-0007036 | Living   | 0 | 91.4      |            | Liver      |
| P-0007039 | Deceased | 1 | 48.77     | Mod-Poorly | Liver      |
| P-0007055 | Living   | 0 | 24.133333 | Mod-Poorly | unknown    |
| P-0007066 | Living   | 0 | 28.53     | Mod        | Liver      |
| P-0007069 | Deceased | 1 | 27.97     | Mod        | Lymph node |
| P-0007070 | Living   | 0 | 29.4      | Mod        | Liver      |
| P-0007079 | Living   | 0 | 31.07     | Mod        | Liver      |
| P-0007080 | Living   | 0 | 86.73     | Mod        | Liver      |
| P-0007081 | Deceased | 1 | 51.9      | Mod        | Liver      |
| P-0007085 | Living   | 0 | 47.3      |            | Liver      |
| P-0007090 | Deceased | 1 | 56.43     | Mod        | Liver      |
| P-0007092 | Living   | 0 | 31.63     | Mod        | Liver      |



|           |          |   |           |            |            |
|-----------|----------|---|-----------|------------|------------|
| P-0007097 | Living   | 0 | 40.6      | Mod        | Lung       |
| P-0007112 | Living   | 0 | 19.03     | Mod        | Liver      |
| P-0007115 | Deceased | 1 | 9.63      | Mod        | Liver      |
| P-0007120 | Deceased | 1 | 19.83     | Poorly     | Liver      |
| P-0007120 | Deceased | 1 | 19.83     | Poorly     | Liver      |
| P-0007126 | Living   | 0 | 65.57     | Mod        | Liver      |
| P-0007126 | Living   | 0 | 65.57     | Mod        | Liver      |
| P-0007128 | Living   | 0 | 117.83    | Mod        | Liver      |
| P-0007132 | Living   | 0 | 112.97    | Mod        | Liver      |
| P-0007133 | Living   | 0 | 113.47    |            | Liver      |
| P-0007135 | Living   | 0 | 64.43     | Mod        | Liver      |
| P-0007136 | Living   | 0 | 125.9     | Mod        | Liver      |
| P-0007140 | Living   | 0 | 35.83     | Mod        | Liver      |
| P-0007144 | Living   | 0 | 32.8      | Mod-Poorly | unknown    |
| P-0007147 | Living   | 0 | 70.9      |            | Liver      |
| P-0007162 | Living   | 0 | 38.37     | Mod        | Liver      |
| P-0007168 | Living   | 0 | 35        | Mod        | Liver      |
| P-0007169 | Living   | 0 | 14.43     | Mod        | unknown    |
| P-0007171 | Living   | 0 | 23.33     | Mod        | Lung       |
| P-0007175 | Living   | 0 | 81.07     | Mod        | Liver      |
| P-0007177 | Living   | 0 | 75.17     | Mod        | Liver      |
| P-0007180 | Living   | 0 | 55.13     | Mod        | Liver      |
| P-0007181 | Living   | 0 | 162.13    | Mod        | Liver      |
| P-0007185 | Living   | 0 | 74.13     | Mod        | Liver      |
| P-0007185 | Living   | 0 | 74.13     | Mod        | Liver      |
| P-0007203 | Living   | 0 | 11.77     | Poorly     | Peritoneum |
| P-0007207 | Living   | 0 | 23.67     |            | Lung       |
| P-0007214 | Deceased | 1 | 15        |            | Lung       |
| P-0007216 | Living   | 0 | 82.17     | Mod        | Liver      |
| P-0007218 | Living   | 0 | 292.93    |            | Liver      |
| P-0007222 | Living   | 0 | 192.3     |            | Peritoneum |
| P-0007226 | Deceased | 1 | 40.63     | Mod        | Liver      |
| P-0007272 | Living   | 0 | 31.13     | Mod        | Liver      |
| P-0007279 | Living   | 0 | 60.73     | Mod        | Liver      |
| P-0007287 | Deceased | 1 | 66.87     | Mod        | Liver      |
| P-0007294 | Living   | 0 | 44.67     | Mod        | Liver      |
| P-0007296 | Living   | 0 | 49.333333 | Poorly     | unknown    |
| P-0007303 | Deceased | 1 | 51.1      | Mod        | Liver      |
| P-0007305 | Living   | 0 | 30.63     |            | Liver      |
| P-0007315 | Living   | 0 | 56.97     |            | Liver      |
| P-0007334 | Living   | 0 | 39.17     |            | Liver      |
| P-0007342 | Deceased | 1 | 16.2      |            | Peritoneum |
| P-0007357 | Deceased | 1 | 83.23     |            | Lung       |
| P-0007361 | Living   | 0 | 116.33    | Mod        | Liver      |
| P-0007365 | Deceased | 1 | 91.47     | Mod        | Liver      |
| P-0007368 | Deceased | 1 | 70.03     | Mod        | Liver      |
| P-0007373 | Living   | 0 | 39.6      | Mod        | Liver      |
| P-0007377 | Deceased | 1 | 31.4      | Mod        | Lymph node |

|           |          |   |        |            |             |
|-----------|----------|---|--------|------------|-------------|
| P-0007380 | Living   | 0 | 75.4   | Mod        | Liver       |
| P-0007381 | Living   | 0 | 36.3   | Mod        | Liver       |
| P-0007389 | Living   | 0 | 63.23  | Mod        | Liver       |
| P-0007391 | Living   | 0 | 35.27  | Poorly     | Liver       |
| P-0007405 | Living   | 0 | 62.7   | Mod        | Liver       |
| P-0007410 | Living   | 0 | 64.23  | Mod        | Liver       |
| P-0007414 | Living   | 0 | 23.77  | Mod        | Lung        |
| P-0007419 | Living   | 0 | 24.07  |            | Liver       |
| P-0007483 | Living   | 0 | 86.07  |            | Liver       |
| P-0007486 | Deceased | 1 | 51.17  | Mod        | Liver       |
| P-0007488 | Living   | 0 | 60.33  | Mod        | Liver       |
| P-0007489 | Living   | 0 | 175.33 | Mod        | Liver       |
| P-0007490 | Living   | 0 | 41.3   | Mod        | Liver       |
| P-0007495 | Living   | 0 | 26.67  | Poorly     | unknown     |
| P-0007511 | Living   | 0 | 22.2   |            | Lymph node  |
| P-0007541 | Living   | 0 | 6.33   | Mod        | Peritoneum  |
| P-0007548 | Deceased | 1 | 23.73  |            | Liver       |
| P-0007550 | Living   | 0 | 22.03  | Mod        | Liver       |
| P-0007554 | Living   | 0 | 66.57  | Mod        | Liver       |
| P-0007555 | Living   | 0 | 21.77  | Mod        | Lung        |
| P-0007560 | Deceased | 1 | 36.43  |            | Liver       |
| P-0007567 | Living   | 0 | 62     | Mod        | Lung        |
| P-0007581 | Deceased | 1 | 52.5   | Mod        | Liver       |
| P-0007584 | Living   | 0 | 116.97 | Mod        | Liver       |
| P-0007586 | Living   | 0 | 69.83  | Mod        | Liver       |
| P-0007588 | Living   | 0 | 65.5   | Mod        | Liver       |
| P-0007590 | Deceased | 1 | 69.1   | Mod        | Liver       |
| P-0007591 | Deceased | 1 | 78.73  | Mod        | Liver       |
| P-0007592 | Living   | 0 | 49.47  | Mod        | Liver       |
| P-0007593 | Living   | 0 | 164.63 | Mod        | Liver       |
| P-0007596 | Living   | 0 | 25.7   | Mod-Poorly | unknown     |
| P-0007600 | Living   | 0 | 33.77  | Mod        | Lymph node  |
| P-0007602 | Deceased | 1 | 19.67  |            | Peritoneum  |
| P-0007631 | Living   | 0 | 79.37  | Mod        | Liver       |
| P-0007632 | Living   | 0 | 67.83  | Mod        | Liver       |
| P-0007637 | Living   | 0 | 22.5   | Mod        | unknown     |
| P-0007645 | Deceased | 1 | 9.1    |            | Liver       |
| P-0007654 | Deceased | 1 | 35.97  | Mod        | Soft Tissue |
| P-0007657 | Living   | 0 | 49.57  | Mod        | Liver       |
| P-0007664 | Living   | 0 | 68.23  | Mod        | Liver       |
| P-0007669 | Living   | 0 | 101.83 | Mod        | Liver       |
| P-0007676 | Living   | 0 | 162.7  |            | Liver       |
| P-0007683 | Living   | 0 | 24.07  |            | Liver       |
| P-0007686 | Living   | 0 | 25.7   | Mod        | Liver       |
| P-0007688 | Deceased | 1 | 17.7   | Mod        | unknown     |
| P-0007691 | Living   | 0 | 27.87  | Mod        | Liver       |
| P-0007698 | Living   | 0 | 27.47  | Mod-Poorly | Liver       |
| P-0007739 | Living   | 0 | 167.77 |            | Liver       |

|           |          |   |            |            |            |
|-----------|----------|---|------------|------------|------------|
| P-0007740 | Living   | 0 | 116.97     |            | Liver      |
| P-0007746 | Living   | 0 | 24.3       |            | unknown    |
| P-0007771 | Deceased | 1 | 132        |            | Liver      |
| P-0007774 | Living   | 0 | 70.13      | Mod        | unknown    |
| P-0007781 | Living   | 0 | 175.47     | Poorly     | Liver      |
| P-0007793 | Living   | 0 | 50.73      | Mod        | Liver      |
| P-0007804 | Living   | 0 | 8.3        |            | Liver      |
| P-0007809 | Deceased | 1 | 22.33      |            | Liver      |
| P-0007831 | Living   | 0 | 0.83333333 | Mod        | unknown    |
| P-0007836 | Living   | 0 | 25.4       | Mod        | unknown    |
| P-0007843 | Living   | 0 | 24.6333333 | Mod        | unknown    |
| P-0007860 | Deceased | 1 | 59.87      | Mod        | Liver      |
| P-0007863 | Deceased | 1 | 33.4       | Mod-Poorly | Liver      |
| P-0007866 | Living   | 0 | 41.77      | Poorly     | Liver      |
| P-0007868 | Living   | 0 | 115.93     |            | Liver      |
| P-0007869 | Living   | 0 | 45.67      | Mod        | Liver      |
| P-0007882 | Living   | 0 | 25.966667  | Mod-Poorly | unknown    |
| P-0007883 | Living   | 0 | 73.53      | Mod        | Liver      |
| P-0007887 | Living   | 0 | 124        | Mod        | Liver      |
| P-0007889 | Living   | 0 | 136.9      | Mod-Poorly | Liver      |
| P-0007893 | Living   | 0 | 127.93     | Mod        | Liver      |
| P-0007909 | Living   | 0 | 158.6      | Mod        | Liver      |
| P-0007912 | Living   | 0 | 82.57      | Mod        | unknown    |
| P-0007929 | Living   | 0 | 49.73      | Mod        | Liver      |
| P-0007931 | Living   | 0 | 75.27      |            | Liver      |
| P-0007975 | Living   | 0 | 31.03      |            | Liver      |
| P-0007979 | Deceased | 1 | 6.3        |            | Lymph node |
| P-0007990 | Deceased | 1 | 9.57       |            | Liver      |
| P-0007996 | Living   | 0 | 60.37      |            | Liver      |
| P-0007997 | Deceased | 1 | 7.33333333 |            | Peritoneum |
| P-0007998 | Living   | 0 | 22.37      | Mod-Poorly | Lung       |
| P-0007998 | Living   | 0 | 22.37      | Mod-Poorly | Lung       |
| P-0007999 | Deceased | 1 | 7.7        | Mod-Poorly | Lung       |
| P-0008019 | Living   | 0 | 22.03      | Mod        | unknown    |
| P-0008022 | Deceased | 1 | 31.07      | Mod        | Liver      |
| P-0008031 | Living   | 0 | 21.87      |            | Liver      |
| P-0008042 | Living   | 0 | 47.5       |            | unknown    |
| P-0008059 | Living   | 0 | 48.33      | Mod        | Peritoneum |
| P-0008063 | Living   | 0 | 70.5       | Mod        | Liver      |
| P-0008068 | Living   | 0 | 88.7       | Mod        | Liver      |
| P-0008075 | Deceased | 1 | 51.3       | Mod        | Liver      |
| P-0008079 | Living   | 0 | 75.97      |            | unknown    |
| P-0008083 | Living   | 0 | 65.17      | Mod-Poorly | Liver      |
| P-0008094 | Deceased | 1 | 105.87     |            | Liver      |
| P-0008095 | Deceased | 1 | 138.03     | Mod        | Lung       |
| P-0008128 | Living   | 0 | 1.27       | Mod        | Liver      |
| P-0008133 | Deceased | 1 | 11.93      |            | Brain      |
| P-0008141 | Living   | 0 | 21.03      | Mod        | Liver      |

|           |          |   |            |            |            |
|-----------|----------|---|------------|------------|------------|
| P-0008159 | Living   | 0 | 9.73       |            | Liver      |
| P-0008167 | Deceased | 1 | 147.4      |            | Liver      |
| P-0008173 | Living   | 0 | 23.73      | Mod        | Lung       |
| P-0008180 | Living   | 0 | 22.23      | Poorly     | unknown    |
| P-0008226 | Living   | 0 | 25.3333333 | Mod        | unknown    |
| P-0008259 | Living   | 0 | 21.53      | Mod        | Liver      |
| P-0008267 | Living   | 0 | 25.2       | Mod-Poorly | Liver      |
| P-0008283 | Living   | 0 | 17.77      |            | Liver      |
| P-0008288 | Living   | 0 | 93.73      |            | Liver      |
| P-0008308 | Deceased | 1 | 53.77      | Mod        | Liver      |
| P-0008317 | Living   | 0 | 23.6       |            | Liver      |
| P-0008321 | Deceased | 1 | 22.87      | Poorly     | Liver      |
| P-0008343 | Living   | 0 | 124        |            | Liver      |
| P-0008350 | Deceased | 1 | 22.6       | Mod        | Peritoneum |
| P-0008357 | Deceased | 1 | 59.3       | Mod        | Liver      |
| P-0008377 | Living   | 0 | 21.67      | Mod-Poorly | Liver      |
| P-0008396 | Living   | 0 | 146.63     | Mod        | Liver      |
| P-0008429 | Deceased | 1 | 19.23      | Mod        | Liver      |
| P-0008429 | Deceased | 1 | 19.23      | Mod        | Liver      |
| P-0008467 | Deceased | 1 | 16.6       |            | Liver      |
| P-0008483 | Living   | 0 | 24.23      |            | Liver      |
| P-0008521 | Deceased | 1 | 15.73      | Mod        | Cervix     |
| P-0008529 | Living   | 0 | 28.6       | Mod        | Peritoneum |
| P-0008534 | Living   | 0 | 22.43      | Mod        | Liver      |
| P-0008540 | Living   | 0 | 117.53     | Mod        | Liver      |
| P-0008541 | Living   | 0 | 49.4       | Mod        | Liver      |
| P-0008551 | Living   | 0 | 21.8       | Mod-Poorly | Liver      |
| P-0008565 | Living   | 0 | 43.43      | Mod        | Liver      |
| P-0008579 | Deceased | 1 | 8.47       |            | Lung       |
| P-0008582 | Living   | 0 | 23.97      | Mod        | Lung       |
| P-0008583 | Living   | 0 | 26.3       | Mod-Poorly | Liver      |
| P-0008584 | Living   | 0 | 117.43     | Mod        | Liver      |
| P-0008588 | Living   | 0 | 31.97      | Mod        | Liver      |
| P-0008590 | Deceased | 1 | 65.4       | Mod        | Liver      |
| P-0008594 | Living   | 0 | 33.97      | Mod        | Liver      |
| P-0008600 | Deceased | 1 | 66.37      |            | Liver      |
| P-0008651 | Living   | 0 | 24.83      |            | Lung       |
| P-0008652 | Living   | 0 | 15.4       | Mod        | Ovary      |
| P-0008662 | Living   | 0 | 67.07      | Mod        | Lung       |
| P-0008671 | Living   | 0 | 95.2       | Mod        | Liver      |
| P-0008683 | Living   | 0 | 25.9       | Mod        | Liver      |
| P-0008690 | Living   | 0 | 21.97      | Mod        | Liver      |
| P-0008721 | Living   | 0 | 24.3       |            | Liver      |
| P-0008724 | Living   | 0 | 33.33      | Mod-Poorly | Liver      |
| P-0008727 | Living   | 0 | 132.97     | Mod        | Liver      |
| P-0008729 | Living   | 0 | 24.4       | Poorly     | unknown    |
| P-0008735 | Living   | 0 | 79.5       | Mod        | unknown    |
| P-0008745 | Living   | 0 | 12.4       | Mod        | unknown    |

|           |          |   |           |            |             |
|-----------|----------|---|-----------|------------|-------------|
| P-0008746 | Living   | 0 | 25.733333 |            | Liver       |
| P-0008747 | Living   | 0 | 10.5      | Poorly     | Liver       |
| P-0008753 | Living   | 0 | 20.73     | Mod        | unknown     |
| P-0008782 | Deceased | 1 | 4.47      |            | Liver       |
| P-0008819 | Living   | 0 | 17.83     | Mod-Poorly | Peritoneum  |
| P-0008841 | Living   | 0 | 21.57     |            | Peritoneum  |
| P-0008853 | Living   | 0 | 19.27     | Mod        | unknown     |
| P-0008868 | Deceased | 1 | 22.67     | Mod-Poorly | Peritoneum  |
| P-0008875 | Living   | 0 | 21.47     | Mod        | Soft Tissue |
| P-0008913 | Living   | 0 | 18.97     | Mod        | unknown     |
| P-0008941 | Living   | 0 | 25.97     | Mod        | unknown     |
| P-0009000 | Living   | 0 | 22.07     |            | Liver       |
| P-0009012 | Deceased | 1 | 15.33     | Mod        | Lung        |
| P-0009013 | Living   | 0 | 23.47     | Mod        | Lung        |
| P-0009016 | Deceased | 1 | 15.27     |            | Liver       |
| P-0009053 | Deceased | 1 | 12.6      |            | Lung        |
| P-0009058 | Living   | 0 | 47.77     | Mod        | Liver       |
| P-0009059 | Deceased | 1 | 10.57     | Poorly     | Lymph node  |
| P-0009062 | Living   | 0 | 26.07     | Mod        | Liver       |
| P-0009114 | Living   | 0 | 20.43     | Mod        | unknown     |
| P-0009121 | Deceased | 1 | 12.73     | Poorly     | Bone        |
| P-0009139 | Living   | 0 | 8.27      | Mod        | Lymph node  |
| P-0009142 | Living   | 0 | 23.67     | Mod        | Liver       |
| P-0009145 | Living   | 0 | 19.87     | Mod        | Liver       |
| P-0009145 | Living   | 0 | 19.87     | Mod        | Liver       |
| P-0009149 | Living   | 0 | 11.33     | Mod        | Lung        |
| P-0009157 | Living   | 0 | 23.666667 | Mod        | unknown     |
| P-0009163 | Living   | 0 | 24.93     |            | Lung        |
| P-0009167 | Living   | 0 | 20.17     |            | Liver       |
| P-0009169 | Deceased | 1 | 23.03     | Mod        | Liver       |
| P-0009170 | Deceased | 1 | 3.77      |            | Liver       |
| P-0009185 | Living   | 0 | 37.23     | Mod        | Liver       |
| P-0009192 | Living   | 0 | 20.13     | Mod        | Lung        |
| P-0009200 | Deceased | 1 | 1.87      |            | Peritoneum  |
| P-0009224 | Living   | 0 | 21.07     | Mod        | Liver       |
| P-0009252 | Deceased | 1 | 8.17      |            | Lymph node  |
| P-0009294 | Living   | 0 | 63.77     | Poorly     | Ovary       |
| P-0009302 | Living   | 0 | 27.03     |            | Liver       |
| P-0009303 | Living   | 0 | 5.4       | Mod-Poorly | Liver       |
| P-0009305 | Living   | 0 | 20.83     | Mod        | Liver       |
| P-0009341 | Living   | 0 | 19.7      | Mod        | Liver       |
| P-0009355 | Deceased | 1 | 18.73     |            | Peritoneum  |
| P-0009362 | Living   | 0 | 24        | Mod        | Liver       |
| P-0009363 | Deceased | 1 | 23        | Mod        | Lung        |
| P-0009377 | Living   | 0 | 99.6      | Mod        | Liver       |
| P-0009403 | Living   | 0 | 22.066667 | Mod        | unknown     |
| P-0009418 | Living   | 0 | 52.93     | Mod        | Pelvis      |
| P-0009433 | Living   | 0 | 21.83     | Mod        | Liver       |

|           |          |   |        |        |             |
|-----------|----------|---|--------|--------|-------------|
| P-0009445 | Living   | 0 | 17.53  | Mod    | Lymph node  |
| P-0009464 | Living   | 0 | 49     |        | Liver       |
| P-0009488 | Deceased | 1 | 17.63  | Poorly | Liver       |
| P-0009561 | Living   | 0 | 29.17  | Mod    | Lung        |
| P-0009617 | Living   | 0 | 23.47  | Mod    | unknown     |
| P-0009645 | Living   | 0 | 32.83  | Mod    | Lung        |
| P-0009650 | Living   | 0 | 25     |        | Liver       |
| P-0009690 | Living   | 0 | 42.27  |        | Liver       |
| P-0009703 | Deceased | 1 | 9.27   |        | Liver       |
| P-0009707 | Living   | 0 | 57.63  | Mod    | Liver       |
| P-0009712 | Deceased | 1 | 1.87   | Poorly | Bone        |
| P-0009716 | Living   | 0 | 9.63   | Poorly | Ovary       |
| P-0009741 | Living   | 0 | 106.07 | Mod    | Liver       |
| P-0009751 | Living   | 0 | 17.6   | Mod    | Lung        |
| P-0009757 | Deceased | 1 | 18     |        | Liver       |
| P-0009760 | Living   | 0 | 19.7   |        | Ovary       |
| P-0009798 | Living   | 0 | 19.17  |        | Liver       |
| P-0009826 | Living   | 0 | 38.1   | Mod    | Liver       |
| P-0009830 | Living   | 0 | 65.5   | Mod    | Lymph node  |
| P-0009838 | Living   | 0 | 42.53  | Mod    | unknown     |
| P-0009842 | Living   | 0 | 46.33  | Mod    | Liver       |
| P-0009850 | Living   | 0 | 36.17  | Poorly | Liver       |
| P-0009851 | Living   | 0 | 19.4   | Mod    | unknown     |
| P-0009863 | Deceased | 1 | 4.9    |        | Liver       |
| P-0009871 | Deceased | 1 | 24.37  | Mod    | unknown     |
| P-0009902 | Living   | 0 | 63     |        | Liver       |
| P-0009903 | Living   | 0 | 181.6  | Mod    | Liver       |
| P-0009905 | Living   | 0 | 10.27  |        | Liver       |
| P-0009949 | Living   | 0 | 19.77  | Mod    | Lymph node  |
| P-0009954 | Living   | 0 | 20.27  | Mod    | Liver       |
| P-0009964 | Living   | 0 | 24     | Mod    | unknown     |
| P-0009964 | Living   | 0 | 24     | Mod    | unknown     |
| P-0009971 | Deceased | 1 | 26.53  | Mod    | Liver       |
| P-0009972 | Living   | 0 | 15.77  | Mod    | Liver       |
| P-0009993 | Living   | 0 | 79.13  | Mod    | Liver       |
| P-0009993 | Living   | 0 | 79.13  | Mod    | Liver       |
| P-0010007 | Living   | 0 | 19.33  |        | Liver       |
| P-0010009 | Living   | 0 | 85.4   |        | Soft Tissue |
| P-0010014 | Living   | 0 | 124.33 | Mod    | Liver       |
| P-0010018 | Living   | 0 | 66.13  | Mod    | Liver       |
| P-0010020 | Living   | 0 | 231.87 |        | Liver       |
| P-0010022 | Living   | 0 | 17.1   | Mod    | unknown     |
| P-0010044 | Living   | 0 | 26.1   | Mod    | Liver       |
| P-0010049 | Living   | 0 | 23.3   | Mod    | unknown     |
| P-0010062 | Deceased | 1 | 27.63  | Mod    | Liver       |
| P-0010074 | Living   | 0 | 142    |        | Liver       |
| P-0010098 | Deceased | 1 | 30.73  | Mod    | Liver       |
| P-0010098 | Deceased | 1 | 30.73  | Mod    | Liver       |

|           |          |   |           |            |            |
|-----------|----------|---|-----------|------------|------------|
| P-0010112 | Living   | 0 | 13.13     | Mod        | unknown    |
| P-0010118 | Living   | 0 | 14.9      | Poorly     | Peritoneum |
| P-0010125 | Deceased | 1 | 2.1       | Poorly     | Liver      |
| P-0010134 | Living   | 0 | 17.53     |            | Peritoneum |
| P-0010138 | Living   | 0 | 35.6      | Mod        | Lymph node |
| P-0010139 | Living   | 0 | 12.6      |            | Liver      |
| P-0010141 | Deceased | 1 | 69.73     | Mod        | unknown    |
| P-0010146 | Deceased | 1 | 17.47     |            | Liver      |
| P-0010147 | Deceased | 1 | 15.53     | Mod-Poorly | Ovary      |
| P-0010159 | Living   | 0 | 14.17     | Mod        | unknown    |
| P-0010160 | Living   | 0 | 18.9      | Mod        | unknown    |
| P-0010167 | Living   | 0 | 20.266667 | Mod-Poorly | unknown    |
| P-0010180 | Living   | 0 | 95.17     | Mod        | Liver      |
| P-0010203 | Living   | 0 | 22.4      | Mod        | Liver      |
| P-0010207 | Living   | 0 | 20.67     | Mod        | Liver      |
| P-0010219 | Deceased | 1 | 23.83     | Mod        | Lung       |
| P-0010238 | Deceased | 1 | 72.73     | Mod        | Liver      |
| P-0010243 | Living   | 0 | 70.97     | Mod        | unknown    |
| P-0010268 | Deceased | 1 | 16.97     |            | Liver      |
| P-0010275 | Living   | 0 | 21.77     | Mod        | Liver      |
| P-0010308 | Living   | 0 | 20.433333 | Poorly     | unknown    |
| P-0010330 | Living   | 0 | 19.1      |            | Liver      |
| P-0010342 | Deceased | 1 | 15.37     |            | Liver      |
| P-0010343 | Living   | 0 | 22.6      |            | Liver      |
| P-0010350 | Deceased | 1 | 14.2      | Poorly     | Liver      |
| P-0010352 | Living   | 0 | 26.2      |            | Lung       |
| P-0010360 | Living   | 0 | 2.53      |            | Liver      |
| P-0010363 | Living   | 0 | 28.73     | Mod        | Liver      |
| P-0010364 | Living   | 0 | 47.73     |            | Liver      |
| P-0010365 | Living   | 0 | 18.47     | Mod        | Liver      |
| P-0010367 | Living   | 0 | 35.03     |            | Liver      |
| P-0010393 | Living   | 0 | 130       |            | Liver      |
| P-0010406 | Deceased | 1 | 22        | Poorly     | Liver      |
| P-0010407 | Deceased | 1 | 41.87     |            | Liver      |
| P-0010422 | Living   | 0 | 19.9      | Mod-Poorly | Liver      |
| P-0010425 | Living   | 0 | 27.6      | Mod        | Lung       |
| P-0010428 | Living   | 0 | 16.53     | Mod        | Peritoneum |
| P-0010432 | Deceased | 1 | 12.7      |            | Peritoneum |
| P-0010497 | Living   | 0 | 15.5      | Poorly     | Peritoneum |
| P-0010499 | Deceased | 1 | 8.6       |            | Bone       |
| P-0010504 | Living   | 0 | 38.766667 | Poorly     | unknown    |
| P-0010506 | Living   | 0 | 18.1      | Poorly     | Liver      |
| P-0010509 | Deceased | 1 | 59.03     | Mod        | Liver      |
| P-0010512 | Living   | 0 | 19.27     | Mod        | Liver      |
| P-0010513 | Living   | 0 | 69.97     | Mod        | Liver      |
| P-0010535 | Living   | 0 | 27.3      | Mod        | Liver      |
| P-0010581 | Living   | 0 | 49.066667 | Poorly     | Rectum     |
| P-0010587 | Living   | 0 | 20.233333 | Mod-Poorly | Rectum     |

|           |          |   |           |            |            |
|-----------|----------|---|-----------|------------|------------|
| P-0010599 | Living   | 0 | 44.2      | Mod        | Liver      |
| P-0010627 | Deceased | 1 | 11.83     |            | Peritoneum |
| P-0010665 | Living   | 0 | 142.33    | Mod        | Liver      |
| P-0010673 | Living   | 0 | 18.77     | Mod        | Liver      |
| P-0010680 | Living   | 0 | 31.57     | Mod-Poorly | Liver      |
| P-0010710 | Deceased | 1 | 15.5      |            | Lymph node |
| P-0010734 | Living   | 0 | 34.33     | Mod        | Liver      |
| P-0010742 | Deceased | 1 | 41.73     | Mod-Poorly | Liver      |
| P-0010749 | Living   | 0 | 17.13     | Mod        | Liver      |
| P-0010751 | Living   | 0 | 88.73     | Mod        | Liver      |
| P-0010781 | Deceased | 1 | 15.8      |            | Peritoneum |
| P-0010783 | Living   | 0 | 22.866667 | Mod        | unknown    |
| P-0010798 | Living   | 0 | 19.8      | Mod        | unknown    |
| P-0010832 | Deceased | 1 | 19.97     | Mod        | unknown    |
| P-0010861 | Living   | 0 | 17.8      | Mod        | unknown    |
| P-0010898 | Living   | 0 | 1.3       |            | Lung       |
| P-0010929 | Living   | 0 | 39.63     | Mod        | unknown    |
| P-0010932 | Living   | 0 | 40.57     | Mod-Poorly | Lung       |
| P-0010959 | Living   | 0 | 44.17     | Mod        | unknown    |
| P-0010960 | Living   | 0 | 14.33     | Poorly     | Liver      |
| P-0010965 | Living   | 0 | 31.63     | Mod        | unknown    |
| P-0010966 | Living   | 0 | 42.27     | Mod        | Liver      |
| P-0010968 | Living   | 0 | 16.73     | Mod        | Liver      |
| P-0010985 | Living   | 0 | 17.23     | Mod        | unknown    |
| P-0011014 | Deceased | 1 | 19.53     |            | Peritoneum |
| P-0011027 | Living   | 0 | 16.37     | Mod-Poorly | unknown    |
| P-0011039 | Living   | 0 | 9.6       |            | Liver      |
| P-0011068 | Living   | 0 | 36.1      | Mod        | Lung       |
| P-0011071 | Deceased | 1 | 6         |            | Peritoneum |
| P-0011074 | Living   | 0 | 11.33     | Mod        | Lung       |
| P-0011084 | Living   | 0 | 21.57     | Mod        | Liver      |
| P-0011108 | Living   | 0 | 17.53     | Mod        | Liver      |
| P-0011109 | Living   | 0 | 23.73     | Poorly     | unknown    |
| P-0011110 | Deceased | 1 | 18.57     |            | Lung       |
| P-0011120 | Living   | 0 | 19.67     | Mod-Poorly | Peritoneum |
| P-0011124 | Living   | 0 | 33.77     | Mod        | Liver      |
| P-0011131 | Living   | 0 | 1.33      |            | Liver      |
| P-0011144 | Deceased | 1 | 15        | Mod        | Liver      |
| P-0011158 | Deceased | 1 | 47.57     | Mod        | unknown    |
| P-0011182 | Deceased | 1 | 19.77     | Poorly     | Liver      |
| P-0011184 | Living   | 0 | 21.03     |            | Liver      |
| P-0011195 | Deceased | 1 | 58.63     | Mod        | Liver      |
| P-0011226 | Living   | 0 | 8.466667  | Mod-Poorly | unknown    |
| P-0011235 | Deceased | 1 | 2.866667  |            | unknown    |
| P-0011239 | Living   | 0 | 20.866667 |            | unknown    |
| P-0011255 | Living   | 0 | 112.6     | Mod        | Liver      |
| P-0011258 | Living   | 0 | 24.97     | Mod-Poorly | Liver      |
| P-0011259 | Living   | 0 | 17        | Mod-Poorly | Liver      |



|           |          |   |           |            |            |
|-----------|----------|---|-----------|------------|------------|
| P-0011264 | Living   | 0 | 6.63      | Mod        | Peritoneum |
| P-0011282 | Living   | 0 | 17.73     |            | Liver      |
| P-0011283 | Living   | 0 | 63.47     |            | Liver      |
| P-0011287 | Deceased | 1 | 8.93      |            | Liver      |
| P-0011288 | Living   | 0 | 34.47     | Mod        | Liver      |
| P-0011291 | Deceased | 1 | 42        | Mod        | Lung       |
| P-0011296 | Living   | 0 | 107       | Mod        | Liver      |
| P-0011300 | Living   | 0 | 18.57     | Mod        | Liver      |
| P-0011306 | Living   | 0 | 20.73     | Mod        | Liver      |
| P-0011324 | Living   | 0 | 26.533333 | Mod        | unknown    |
| P-0011347 | Living   | 0 | 22.27     | Mod        | unknown    |
| P-0011357 | Living   | 0 | 25.33     | Mod        | Pelvis     |
| P-0011366 | Living   | 0 | 19.77     |            | Liver      |
| P-0011374 | Living   | 0 | 24.57     | Mod        | Liver      |
| P-0011380 | Living   | 0 | 14.97     |            | Liver      |
| P-0011384 | Living   | 0 | 16.8      |            | Liver      |
| P-0011396 | Living   | 0 | 18        | Mod-Poorly | unknown    |
| P-0011446 | Living   | 0 | 38.766667 | Mod-Poorly | unknown    |
| P-0011455 | Deceased | 1 | 50.4      | Mod        | Liver      |
| P-0011468 | Deceased | 1 | 15.57     | Mod        | Liver      |
| P-0011484 | Living   | 0 | 125.33    | Mod        | Liver      |
| P-0011510 | Living   | 0 | 19.37     |            | unknown    |
| P-0011511 | Living   | 0 | 0.27      |            | Skin       |
| P-0011512 | Living   | 0 | 28.57     | Mod        | Lymph node |
| P-0011520 | Living   | 0 | 24.4      | Mod        | Liver      |
| P-0011533 | Living   | 0 | 120       |            | Liver      |
| P-0011545 | Living   | 0 | 17.5      | Mod-Poorly | Peritoneum |
| P-0011563 | Living   | 0 | 16.87     |            | Liver      |
| P-0011603 | Living   | 0 | 16.13     | Mod-Poorly | unknown    |
| P-0012032 | Living   | 0 | 21        |            | Liver      |
| P-0012033 | Deceased | 1 | 24.23     | Mod-Poorly | Lymph node |
| P-0012074 | Living   | 0 | 20.27     | Mod        | Liver      |
| P-0012100 | Living   | 0 | 15.03     | Mod        | Lung       |
| P-0012110 | Deceased | 1 | 8.37      |            | Liver      |
| P-0012115 | Living   | 0 | 17.4      |            | Liver      |
| P-0012133 | Deceased | 1 | 18.2      |            | Liver      |
| P-0012135 | Living   | 0 | 26.33     | Mod-Poorly | Liver      |
| P-0012147 | Living   | 0 | 83.27     |            | Lung       |
| P-0012233 | Deceased | 1 | 14.13     |            | Liver      |
| P-0012249 | Living   | 0 | 19.333333 |            | Kidney     |
| P-0012266 | Living   | 0 | 10.07     | Mod        | unknown    |
| P-0012268 | Living   | 0 | 15.43     | Mod        | Lung       |
| P-0012277 | Deceased | 1 | 28.3      |            | Liver      |
| P-0012281 | Living   | 0 | 56.7      |            | Liver      |
| P-0012313 | Living   | 0 | 15.2      | Poorly     | unknown    |
| P-0012340 | Living   | 0 | 25.07     | Mod        | Liver      |
| P-0012366 | Living   | 0 | 16.67     |            | Liver      |
| P-0012383 | Deceased | 1 | 23.9      | Mod        | Liver      |

|           |          |   |           |            |            |
|-----------|----------|---|-----------|------------|------------|
| P-0012384 | Living   | 0 | 28.97     | Mod        | Liver      |
| P-0012389 | Deceased | 1 | 9.07      |            | Liver      |
| P-0012399 | Living   | 0 | 16        | Mod-Poorly | Liver      |
| P-0012402 | Living   | 0 | 14.13     | Mod        | Liver      |
| P-0012406 | Living   | 0 | 51.03     | Mod        | unknown    |
| P-0012415 | Living   | 0 | 14.07     |            | Ovary      |
| P-0012418 | Living   | 0 | 17.4      |            | Liver      |
| P-0012418 | Living   | 0 | 17.4      |            | Liver      |
| P-0012419 | Living   | 0 | 9.97      |            | Liver      |
| P-0012426 | Living   | 0 | 58.7      | Mod        | Liver      |
| P-0012447 | Living   | 0 | 15.73     | Mod        | Liver      |
| P-0012554 | Living   | 0 | 13.2      |            | Liver      |
| P-0012566 | Living   | 0 | 51.9      | Mod        | Liver      |
| P-0012623 | Living   | 0 | 19.3      | Poorly     | Liver      |
| P-0012625 | Deceased | 1 | 15.47     |            | Liver      |
| P-0012653 | Deceased | 1 | 9.77      |            | Liver      |
| P-0012653 | Deceased | 1 | 9.77      |            | Liver      |
| P-0012680 | Deceased | 1 | 16.73     |            | Liver      |
| P-0012683 | Living   | 0 | 16.37     | Poorly     | Liver      |
| P-0012685 | Living   | 0 | 1.97      |            | unknown    |
| P-0012695 | Living   | 0 | 31.57     | Mod        | Liver      |
| P-0012708 | Living   | 0 | 26.1      | Mod        | Lung       |
| P-0012722 | Living   | 0 | 17.2      | Mod        | Liver      |
| P-0012723 | Deceased | 1 | 5.03      |            | Ovary      |
| P-0012728 | Living   | 0 | 16.27     |            | Liver      |
| P-0012738 | Deceased | 1 | 11.27     | Poorly     | Lymph node |
| P-0012742 | Living   | 0 | 16.53     | Mod        | Peritoneum |
| P-0012747 | Living   | 0 | 16.33     | Poorly     | Brain      |
| P-0012779 | Deceased | 1 | 5         |            | Pelvis     |
| P-0012781 | Living   | 0 | 6.07      | Mod        | Liver      |
| P-0012810 | Living   | 0 | 2.6       | Mod        | Lung       |
| P-0012823 | Living   | 0 | 15.5      |            | Liver      |
| P-0012823 | Living   | 0 | 15.5      |            | Liver      |
| P-0012847 | Living   | 0 | 13.13     | Mod-Poorly | Lung       |
| P-0012877 | Living   | 0 | 16.6      | Mod        | unknown    |
| P-0012878 | Living   | 0 | 15.33     |            | Liver      |
| P-0012900 | Living   | 0 | 34.57     | Mod        | Liver      |
| P-0012912 | Living   | 0 | 10.57     |            | Liver      |
| P-0012965 | Living   | 0 | 15.47     |            | unknown    |
| P-0012974 | Living   | 0 | 16.87     | Mod        | Liver      |
| P-0013010 | Living   | 0 | 19.766667 | Poorly     | unknown    |
| P-0013020 | Deceased | 1 | 13.2      |            | Liver      |
| P-0013055 | Living   | 0 | 2.27      | Mod-Poorly | unknown    |
| P-0013062 | Living   | 0 | 9.33      |            | Peritoneum |
| P-0013082 | Living   | 0 | 21        | Mod        | unknown    |
| P-0013087 | Living   | 0 | 78.67     | Mod        | Pelvis     |
| P-0013088 | Living   | 0 | 2.8       | Poorly     | Bone       |
| P-0013096 | Living   | 0 | 46.03     | Poorly     | Liver      |

|           |          |   |           |            |            |
|-----------|----------|---|-----------|------------|------------|
| P-0013103 | Living   | 0 | 5.73      | Mod        | Liver      |
| P-0013121 | Living   | 0 | 33.53     | Mod        | Liver      |
| P-0013121 | Living   | 0 | 33.53     | Mod        | Liver      |
| P-0013144 | Living   | 0 | 9.47      |            | Liver      |
| P-0013146 | Living   | 0 | 15.47     | Mod        | Liver      |
| P-0013156 | Living   | 0 | 42.57     |            | Lymph node |
| P-0013159 | Living   | 0 | 131.6     | Mod        | unknown    |
| P-0013169 | Deceased | 1 | 11.8      | Poorly     | unknown    |
| P-0013186 | Living   | 0 | 6.17      |            | Liver      |
| P-0013201 | Living   | 0 | 28        | Mod        | Liver      |
| P-0013227 | Living   | 0 | 173.56667 |            | Peritoneum |
| P-0013258 | Living   | 0 | 17        | Mod-Poorly | Liver      |
| P-0013263 | Living   | 0 | 16.23     | Poorly     | Liver      |
| P-0013277 | Living   | 0 | 37.87     | Mod        | unknown    |
| P-0013285 | Living   | 0 | 31.7      |            | Peritoneum |
| P-0013300 | Living   | 0 | 7.97      | Mod        | Ovary      |
| P-0013354 | Deceased | 1 | 31.9      |            | Liver      |
| P-0013357 | Living   | 0 | 14.7      | Mod        | unknown    |
| P-0013374 | Living   | 0 | 10.4      |            | unknown    |
| P-0013375 | Deceased | 1 | 12.8      |            | Liver      |
| P-0013395 | Living   | 0 | 23.6      | Mod        | Liver      |
| P-0013397 | Living   | 0 | 15.37     | Mod-Poorly | Pelvis     |
| P-0013400 | Living   | 0 | 21.6      | Mod        | unknown    |
| P-0013404 | Deceased | 1 | 22.7      | Mod        | Lymph node |
| P-0013407 | Living   | 0 | 13        |            | Liver      |
| P-0013441 | Living   | 0 | 34.47     |            | Lung       |
| P-0013461 | Living   | 0 | 14.37     | Mod-Poorly | Peritoneum |
| P-0013462 | Living   | 0 | 18.966667 |            | Lymph node |
| P-0013488 | Living   | 0 | 15.13     |            | Liver      |
| P-0013492 | Living   | 0 | 19.066667 | Mod        | unknown    |
| P-0013495 | Living   | 0 | 14.43     |            | Liver      |
| P-0013551 | Deceased | 1 | 4.1       | Mod-Poorly | Peritoneum |
| P-0013594 | Living   | 0 | 18.1      | Mod        | Pelvis     |
| P-0013648 | Living   | 0 | 1.1       |            | Liver      |
| P-0013704 | Deceased | 1 | 9.5       | Mod-Poorly | Peritoneum |
| P-0013735 | Living   | 0 | 72.733333 | Mod        | unknown    |
| P-0013758 | Living   | 0 | 16.97     |            | Peritoneum |
| P-0013760 | Living   | 0 | 16.1      |            | Liver      |
| P-0013772 | Living   | 0 | 13.3      | Mod        | Liver      |
| P-0013784 | Living   | 0 | 11.7      | Mod        | Peritoneum |
| P-0013785 | Living   | 0 | 6.03      | Mod        | Liver      |
| P-0013786 | Deceased | 1 | 14.17     | Mod        | Liver      |
| P-0013787 | Living   | 0 | 21.266667 | Mod        | unknown    |
| P-0013788 | Living   | 0 | 12.97     | Mod-Poorly | Lymph node |
| P-0013799 | Living   | 0 | 24.7      | Mod        | Lung       |
| P-0013820 | Living   | 0 | 14.93     |            | Liver      |
| P-0013822 | Living   | 0 | 0.7       | Mod        | Ovary      |
| P-0013828 | Living   | 0 | 12.67     |            | Liver      |

|           |          |   |           |            |                      |
|-----------|----------|---|-----------|------------|----------------------|
| P-0013856 | Deceased | 1 | 64.2      |            | Liver                |
| P-0013876 | Living   | 0 | 15.866667 | Poorly     | unknown              |
| P-0013881 | Living   | 0 | 17.3      | Mod        | Liver                |
| P-0013894 | Living   | 0 | 16.13     | Mod        | Coloanal Anastamosis |
| P-0013897 | Living   | 0 | 142.9     | Mod        | Peritoneum           |
| P-0013907 | Living   | 0 | 29.67     | Mod        | unknown              |
| P-0013929 | Living   | 0 | 13.3      | Mod        | Lung                 |
| P-0013941 | Living   | 0 | 19.23     | Mod        | Liver                |
| P-0013947 | Living   | 0 | 13.37     | Mod        | Liver                |
| P-0013955 | Living   | 0 | 10.3      | Poorly     | unknown              |
| P-0013963 | Living   | 0 | 7.8       | Poorly     | Peritoneum           |
| P-0013975 | Living   | 0 | 47.43     | Mod        | Liver                |
| P-0013981 | Living   | 0 | 1.8       | Poorly     | Liver                |
| P-0013982 | Living   | 0 | 14.03     |            | Liver                |
| P-0014010 | Deceased | 1 | 64.7      | Mod        | Liver                |
| P-0014020 | Living   | 0 | 14.8      |            | Liver                |
| P-0014021 | Living   | 0 | 0         | Mod        | Rectovaginal Fistula |
| P-0014026 | Living   | 0 | 7.53      | Mod        | Liver                |
| P-0014042 | Living   | 0 | 7.87      | Mod        | Liver                |
| P-0014066 | Living   | 0 | 23.83     | Mod        | Liver                |
| P-0014116 | Deceased | 1 | 9.83      |            | Liver                |
| P-0014119 | Living   | 0 | 14.97     | Mod        | Liver                |
| P-0014133 | Living   | 0 | 25.83     | Mod        | Liver                |
| P-0014143 | Living   | 0 | 105.43333 |            | Liver                |
| P-0014168 | Living   | 0 | 16.6      | Mod        | Liver                |
| P-0014182 | Living   | 0 | 44.63     | Mod        | Lung                 |
| P-0014190 | Living   | 0 | 13.97     | Mod        | Peritoneum           |
| P-0014195 | Living   | 0 | 7.37      | Poorly     | Liver                |
| P-0014252 | Living   | 0 | 55.37     | Mod        | Liver                |
| P-0014258 | Deceased | 1 | 9.97      | Mod-Poorly | Lymph node           |
| P-0014296 | Living   | 0 | 12.07     |            | Brain                |
| P-0014404 | Living   | 0 | 28.23     | Poorly     | unknown              |
| P-0014415 | Living   | 0 | 24.1      | Mod        | Liver                |

Supplementary Table 3. Data of primary tumors from GSE39582 dataset.

| sample ID | SSP.CMS      | tumor site | gender | age | AJCC stage | T  | N  | M  | tumor location | chem otherapy.adj uvant | chem otherapy.adj uvant. type | rfs. ev ent | rfs. del ay | os .ev ent | os. del ay | mmr.s tatus | cimp. status | cin.st atus | tp53. mutati on | kraf.m utatio n | braf.m utatio n |
|-----------|--------------|------------|--------|-----|------------|----|----|----|----------------|-------------------------|-------------------------------|-------------|-------------|------------|------------|-------------|--------------|-------------|-----------------|-----------------|-----------------|
| GSM971957 | Undetermined | primary    | Male   | 35  | IV         | T4 | N2 | M1 | Left           | N                       |                               | 1           | 0           | 1          | 10         | pMMR        | -            | +           | M               | M               | WT              |
| GSM971958 | CMS4         | primary    | Female | 36  | IV         | T3 | N2 | M1 | Left           | N                       |                               | 1           | 0           | 1          | 9          | pMMR        | -            | -           | WT              | WT              | WT              |
| GSM971959 | Undetermined | primary    | Male   | 37  | II         | T4 | N0 | M0 | Right          | N                       |                               | 1           | 4           | 0          | 52         | pMMR        | -            | -           | M               | WT              | WT              |
| GSM971960 | CMS2         | primary    | Female | 38  | I          | T2 | N0 | M0 | Left           | N                       |                               | 0           | 74          | 0          | 74         | pMMR        | -            | +           | M               | WT              | WT              |
| GSM971961 | CMS4         | primary    | Female | 39  | IV         | T3 | N1 | M1 | Left           | Y                       |                               | 1           | 1           | 1          | 32         | pMMR        | -            | -           | M               | WT              | WT              |
| GSM971962 | CMS4         | primary    | Male   | 61  | III        | T4 | N2 | M0 | Right          | Y                       |                               | 0           | 73          | 0          | 73         | dMMR        | -            | +           | WT              | WT              | WT              |
| GSM971963 | CMS1         | primary    | Male   | 78  | II         | T3 | N0 | M0 | Right          | Y                       |                               | 1           | 17          | 1          | 20         | dMMR        | -            | -           | WT              | WT              | WT              |
| GSM971964 | CMS2         | primary    | Female | 35  | III        | T2 | N2 | M0 | Left           | N                       |                               | 0           | 35          | 0          | 35         | pMMR        | -            | -           | M               | WT              | WT              |
| GSM971965 | Undetermined | primary    | Female | 38  | II         | T3 | N0 | M0 | Left           | N                       |                               | 0           | 33          | 0          | 33         | pMMR        | -            | +           | WT              | M               | WT              |
| GSM971966 | Undetermined | primary    | Female | 41  | III        | T3 | N1 | M0 | Left           | N                       |                               | 0           | 63          | 0          | 63         |             | -            | +           | M               | M               | WT              |
| GSM971967 | CMS3         | primary    | Male   | 43  | II         | T3 | N0 | M0 | Right          | N                       |                               |             | 31          | 1          | 31         | pMMR        | -            | -           | WT              | M               | WT              |
| GSM971968 | CMS4         | primary    | Female | 45  | II         | T4 | N0 | M0 | Right          | N                       |                               | 1           | 93          | 0          | 112        | pMMR        | -            | +           | M               | M               | WT              |
| GSM971969 | Undetermined | primary    | Male   | 30  | I          | T1 | N0 | M0 | Left           | N                       |                               | 0           | 63          | 0          | 63         | dMMR        | -            | -           | WT              | WT              | WT              |
| GSM971970 | Undetermined | primary    | Female | 32  | I          | T2 | N0 | M0 | Right          | N                       |                               | 0           | 86          | 0          | 86         | dMMR        | -            | -           | WT              | M               | WT              |
| GSM971971 | Undetermined | primary    | Female | 35  | IV         | T4 | N2 | M1 | Right          | N                       |                               | 0           | 65          | 0          | 65         | dMMR        | -            | +           | WT              | M               | WT              |
| GSM971972 | CMS2         | primary    | Male   | 40  | I          | T2 | N0 | M0 | Left           | N                       |                               | 0           | 75          | 0          | 75         | dMMR        | -            | +           | WT              | WT              | WT              |
| GSM971973 | CMS1         | primary    | Male   | 25  | II         | T3 | N0 | M0 | Left           | N                       |                               | 0           | 46          | 0          | 46         | pMMR        | -            | +           | WT              | WT              | WT              |
| GSM971974 | CMS3         | primary    | Female | 41  | IV         | T4 | N1 | M1 | Left           | N                       |                               | 0           | 56          | 0          | 56         | pMMR        | -            | +           | M               | M               | WT              |
| GSM971975 | CMS2         | primary    | Female | 42  | II         | T3 | N0 | M0 | Left           | N                       |                               | 0           | 46          | 0          | 46         | pMMR        | -            | +           | WT              | WT              | WT              |
| GSM971976 | CMS2         | primary    | Female | 45  | II         | T4 | N0 | M0 | Left           | N                       |                               | 0           | 36          | 0          | 36         |             | -            | +           | M               | WT              | WT              |
| GSM971977 | CMS1         | primary    | Female | 41  | III        | T4 | N1 | M0 | Right          | N                       |                               | 0           | 49          | 0          | 49         | dMMR        | -            | +           | WT              | M               | WT              |
| GSM971978 | CMS1         | primary    | Female | 71  | I          | T2 | N0 | M0 | Right          | N                       |                               | 0           | 109         | 0          | 109        | dMMR        |              | -           | M               | M               | WT              |
| GSM971979 | CMS1         | primary    | Female | 66  | II         | T3 | N0 | M0 | Right          | N                       |                               | 0           | 53          | 0          | 53         | dMMR        | +            | +           | WT              | WT              | WT              |
| GSM971980 | CMS1         | primary    | Male   | 77  | III        | T4 | N1 | M0 | Right          | N                       |                               | 0           | 59          | 0          | 59         | dMMR        | +            | -           | WT              | WT              | M               |
| GSM971981 | CMS1         | primary    | Male   | 82  | II         | T3 | N0 | M0 | Right          | N                       |                               | 0           | 48          | 0          | 48         | dMMR        | -            | +           | WT              | M               | WT              |
| GSM971982 | CMS1         | primary    | Male   | 79  | III        | T4 | N2 | M0 | Right          | N                       |                               | 0           | 42          | 1          | 42         | dMMR        | +            | +           | M               | M               | WT              |
| GSM971983 | CMS1         | primary    | Male   | 75  | III        | T3 | N1 | M0 | Right          | N                       |                               | 0           | 87          | 0          | 87         | dMMR        | +            | +           | M               | WT              | M               |
| GSM971984 | CMS1         | primary    | Female | 68  | II         | T4 | N0 | M0 | Right          | N                       |                               | 1           | 5           | 0          | 81         | dMMR        | +            | +           | WT              | WT              | M               |
| GSM971985 | CMS3         | primary    | Male   | 67  | 0          | T0 | N0 | M0 | Right          | N                       |                               | 0           | 7           | 0          | 7          | pMMR        | -            | +           | WT              | M               | WT              |
| GSM971986 | CMS4         | primary    | Male   | 66  | II         | T3 | N0 | M0 | Right          | N                       |                               | 0           | 68          | 0          | 68         | pMMR        | -            | -           | M               | WT              | WT              |
| GSM971987 | CMS4         | primary    | Male   | 67  | II         | T3 | N0 | M0 | Right          | N                       |                               | 0           | 68          | 0          | 68         | pMMR        | -            | +           | WT              | WT              | WT              |
| GSM971988 | Undetermined | primary    | Female | 77  | IV         | T4 | N1 | M1 | Right          | N                       |                               | 1           | 15          | 1          | 18         | pMMR        | +            | -           | M               | WT              | M               |
| GSM971989 | CMS3         | primary    | Male   | 71  | I          | T2 | N0 | M0 | Right          | N                       |                               | 1           | 16          | 1          | 24         | pMMR        | -            | -           | WT              | M               | WT              |

|           |              |         |        |    |     |    |    |    |       |   |     |   |     |   |     |      |   |   |    |    |    |
|-----------|--------------|---------|--------|----|-----|----|----|----|-------|---|-----|---|-----|---|-----|------|---|---|----|----|----|
| GSM971990 | Undetermined | primary | Male   | 83 | I   | T2 | N0 | M0 | Right | N |     | 0 | 12  | 1 | 12  | pMMR | + | + | WT | M  | WT |
| GSM971991 | CMS2         | primary | Male   | 71 | II  | T3 | N0 | M0 | Left  | N |     | 0 | 55  | 1 | 55  | pMMR | - |   | M  | WT | WT |
| GSM971992 | CMS2         | primary | Male   | 86 | II  | T4 | N0 | M0 | Left  | N |     | 0 | 20  | 1 | 20  | pMMR | - |   | WT | WT | WT |
| GSM971993 | Undetermined | primary | Male   | 68 | II  | T3 | N0 | M0 | Left  | N |     | 0 | 56  | 0 | 56  | pMMR | - | + | WT | M  | WT |
| GSM971994 | CMS2         | primary | Male   | 81 | II  | T3 | N0 | M0 | Right | N |     | 0 | 43  | 0 | 43  | pMMR | - | + | M  | WT | WT |
| GSM971995 | Undetermined | primary | Female | 62 | II  | T4 | N0 | M0 | Left  | N |     | 0 | 25  | 0 | 25  | pMMR | - | - | WT | WT | WT |
| GSM971996 | CMS4         | primary | Female | 63 | III | T3 | N1 | M0 | Right | N |     | 0 | 76  | 0 | 76  | pMMR | - | - | WT | WT | WT |
| GSM971997 | CMS1         | primary | Male   | 72 | III | T3 | N2 | M0 | Right | N |     | 0 | 89  | 0 | 89  | pMMR | + | + | M  | WT | M  |
| GSM971998 | Undetermined | primary | Male   | 75 | III | T3 | N1 | M0 | Right | N |     | 1 | 18  | 1 | 23  | pMMR | - | + | WT | M  | WT |
| GSM971999 | CMS2         | primary | Male   | 62 | III | T3 | N1 | M0 | Left  | N |     | 0 | 1   | 0 | 1   | pMMR | - | + | M  | WT | WT |
| GSM972000 | CMS2         | primary | Female | 76 | III | T3 | N2 | M0 | Left  | Y |     | 1 | 9   | 0 | 9   | pMMR | - | + | WT | WT | WT |
| GSM972001 | CMS2         | primary | Male   | 72 | III | T2 | N1 | M0 | Left  | N |     | 0 | 73  | 0 | 73  | pMMR | - | - | M  | WT | WT |
| GSM972002 | Undetermined | primary | Male   | 78 | III | T4 | N1 | M0 | Left  | N |     | 1 | 25  | 0 | 26  | pMMR | - | + | M  | M  | WT |
| GSM972003 | CMS2         | primary | Male   | 65 | IV  | T3 | N2 | M1 | Right | Y |     | 1 | 0   | 1 | 27  | pMMR | - | - | WT | M  | WT |
| GSM972004 | CMS2         | primary | Female | 63 | IV  | T3 | N1 | M1 | Right | N |     | 0 | 89  | 0 | 89  | pMMR | - | + | M  | M  | WT |
| GSM972005 | CMS3         | primary | Male   | 66 | IV  | T4 | N1 | M1 | Right | N |     | 1 | 0   | 0 | 44  | pMMR | - | + | M  | M  | WT |
| GSM972006 | Undetermined | primary | Female | 68 | IV  | T3 | N0 | M1 | Left  | Y |     | 1 | 0   | 1 | 23  | pMMR | - | + | WT | WT | WT |
| GSM972007 | CMS4         | primary | Male   | 71 | IV  | T4 | N2 | M1 | Right | N |     | 0 | 2   | 1 | 2   | pMMR | + | + | WT | WT | M  |
| GSM972008 | Undetermined | primary | Male   | 67 | IV  | T4 | N2 | M1 | Left  | N |     | 1 | 2   | 1 | 72  | pMMR | + |   | M  | WT | M  |
| GSM972009 | Undetermined | primary | Male   | 68 | IV  | T3 | N2 | M1 | Left  | N |     | 1 | 0   | 1 | 10  | pMMR | - | - | M  | M  | WT |
| GSM972010 | Undetermined | primary | Male   | 75 | IV  | T3 | N1 | M1 | Left  | N |     | 1 | 10  | 1 | 46  | pMMR | - | - | WT | M  | WT |
| GSM972011 | CMS4         | primary | Female | 75 | IV  | T4 | N1 | M1 | Left  | N |     | 1 | 18  | 1 | 20  | pMMR | + | - | WT | WT | M  |
| GSM972012 | CMS3         | primary | Female | 87 | IV  | T3 | N1 | M1 | Right | N |     | 0 | 101 | 0 | 101 | pMMR | - | + | WT | M  | WT |
| GSM972013 | CMS2         | primary | Female | 89 | IV  | T2 | N1 | M1 | Left  | N |     | 0 | 43  | 1 | 43  | pMMR | - | - | WT | WT | WT |
| GSM972014 | CMS2         | primary | Male   | 66 | IV  | T3 | N0 | M1 | Left  | Y |     | 1 | 0   | 1 | 29  | pMMR | - | - | M  | WT | WT |
| GSM972015 | CMS1         | primary | Female | 92 | II  | T3 | N0 | M0 | Left  | N |     | 0 | 91  | 0 | 91  | dMMR | + | - | WT | M  | WT |
| GSM972016 | Undetermined | primary | Female | 75 | II  | T3 | N0 | M0 | Right | N |     | 1 | 14  | 1 | 16  | dMMR | - | - | M  | WT | WT |
| GSM972017 | CMS2         | primary | Female | 73 | III | T3 | N2 | M0 | Right | Y | 5FU | 0 | 43  | 0 | 43  | pMMR | - | + | M  | WT |    |
| GSM972018 | CMS2         | primary | Female | 68 | III | T2 | N2 | M0 | Left  | Y | 5FU | 0 | 117 | 0 | 117 | pMMR | - | + | WT | WT |    |
| GSM972019 | CMS4         | primary | Male   | 54 | III | T3 | N3 | M0 | Right | Y | 5FU | 1 | 21  | 1 | 25  | pMMR | + | + | WT | M  |    |
| GSM972020 | CMS2         | primary | Female | 49 | III | T3 | N2 | M0 | Left  | Y | 5FU | 1 | 9   | 0 | 78  | pMMR | - | + | WT | WT |    |
| GSM972021 | Undetermined | primary | Female | 58 | III | T3 | N2 | M0 | Left  | Y | 5FU | 1 | 5   | 1 | 37  | pMMR | - | + | WT | WT |    |
| GSM972022 | CMS2         | primary | Female | 76 | III | T3 | N2 | M0 | Right | Y | 5FU | 0 | 82  | 0 | 82  | pMMR | - | + | M  | WT |    |
| GSM972023 | Undetermined | primary | Female | 59 | III | T3 | N1 | M0 | Left  | Y | 5FU | 1 | 6   | 0 | 16  | pMMR | - | + | M  | WT |    |
| GSM972024 | CMS2         | primary | Male   | 62 | III | T2 | N2 | M0 | Left  | Y | 5FU | 1 | 37  | 0 | 43  | pMMR | - | + | WT | WT |    |
| GSM972025 | Undetermined | primary | Male   | 49 | III | T3 | N2 | M0 | Left  | Y | 5FU | 0 | 53  | 0 | 53  | pMMR | - | + | WT | WT |    |
| GSM972026 | CMS4         | primary | Male   | 75 | III | T3 | N2 | M0 | Left  | Y | 5FU | 1 | 32  | 1 | 34  | pMMR | - | + | WT |    |    |
| GSM972027 | CMS2         | primary | Female | 70 | III | T3 | N2 | M0 | Right | Y | 5FU | 0 | 94  | 0 | 94  | pMMR | - | + | WT | WT |    |
| GSM972028 | CMS2         | primary | Female | 46 | III | T3 | N2 | M0 | Right | Y | 5FU | 0 | 78  | 0 | 78  | pMMR | + | + | M  | WT |    |
| GSM972029 | Undetermined | primary | Male   | 58 | III | T4 | N2 | M0 | Left  | Y | 5FU | 0 | 36  | 0 | 36  | pMMR | - | + | WT | WT |    |
| GSM972030 | Undetermined | primary | Female | 68 | III | T3 | N3 | M0 | Right | Y | 5FU | 0 | 52  | 0 | 52  | pMMR | - | + | WT | M  |    |

|           |              |         |        |    |    |    |    |    |       |   |         |   |     |    |      |      |   |    |    |    |
|-----------|--------------|---------|--------|----|----|----|----|----|-------|---|---------|---|-----|----|------|------|---|----|----|----|
| GSM972031 | CMS2         | primary | Male   | 81 | II | T3 | N0 | M0 | Left  | N |         | 0 | 55  | 0  | 55   | pMMR |   |    |    |    |
| GSM972032 | CMS2         | primary | Female | 64 | II | T3 | N0 | M0 | Right | N |         | 0 | 60  | 0  | 60   | pMMR | - | +  | WT | WT |
| GSM972033 | CMS2         | primary | Female | 45 | II | T4 | N0 | M0 | Left  | N |         | 0 | 50  | 0  | 50   | pMMR |   |    |    |    |
| GSM972034 | CMS2         | primary | Male   | 77 | II | T3 | N0 | M0 | Right | N |         | 0 | 50  | 0  | 50   | pMMR | - |    | M  | WT |
| GSM972035 | CMS2         | primary | Female | 94 | II | T3 | N0 | M0 | Right | N |         | 0 | 39  | 0  | 39   | pMMR | - | +  | WT | WT |
| GSM972036 | Undetermined | primary | Female | 47 | II | T4 | N0 | M0 | Right | N |         | 0 | 50  | 0  | 50   | pMMR |   |    |    |    |
| GSM972037 | CMS3         | primary | Male   | 78 | II | T4 | N0 | M0 | Right | N |         | 0 | 33  | 0  | 33   | pMMR | + | -  | M  | WT |
| GSM972038 | CMS2         | primary | Male   | 61 | II | T3 | N0 | M0 | Left  | N |         | 0 | 1   | 1  | 1    | pMMR | - | +  | WT | WT |
| GSM972039 | CMS4         | primary | Male   | 65 | IV | T4 | N0 | M1 | Left  | Y | FOLFO)1 | 0 | 1   | 52 | pMMR | -    | - | WT | WT |    |
| GSM972040 | CMS2         | primary | Male   | 81 | II | T3 | N0 | M0 | Left  | N |         | 0 | 63  | 0  | 63   | pMMR | - | +  | WT | WT |
| GSM972041 | CMS2         | primary | Male   | 78 | II | T3 | N0 | M0 | Left  | N |         | 0 | 55  | 0  | 55   | pMMR | - | +  | M  | WT |
| GSM972042 | CMS3         | primary | Male   | 83 | II | T3 | N0 | M0 | Right | N |         | 0 | 51  | 0  | 51   | pMMR | - | -  | M  | WT |
| GSM972043 | CMS2         | primary | Male   | 56 | IV | T3 | N0 | M1 | Left  | Y | other   | 1 | 0   | 1  | 27   | pMMR | - | +  | WT | WT |
| GSM972044 | CMS3         | primary | Male   | 58 | II | T4 | N0 | M0 | Right | Y | FUFOL   | 0 | 42  | 0  | 42   | pMMR | + | +  | WT | WT |
| GSM972045 | CMS3         | primary | Male   | 71 | IV | T3 | N0 | M1 | Right | Y | FOLFIR  | 1 | 0   | 1  | 11   | pMMR | - | -  | M  | WT |
| GSM972046 | CMS4         | primary | Male   | 54 | II | T3 | N0 | M0 | Left  | N |         | 1 | 21  | 0  | 58   | pMMR | - | +  | WT | WT |
| GSM972047 | CMS2         | primary | Female | 93 | II | T3 | N0 | M0 | Right | N |         | 0 | 33  | 0  | 33   | pMMR | - | +  | M  | WT |
| GSM972048 | CMS2         | primary | Female | 50 | IV | T4 | N0 | M1 | Left  | Y |         | 1 | 0   | 0  | 30   | pMMR | - | +  | M  | WT |
| GSM972049 | CMS3         | primary | Male   | 79 | II | T3 | N0 | M0 | Right | N |         | 0 | 26  | 0  | 26   | pMMR | - | +  | M  | WT |
| GSM972050 | CMS3         | primary | Female | 75 | II | T3 | N0 | M0 | Left  | N |         | 0 | 19  | 0  | 19   | pMMR | - | +  | M  | WT |
| GSM972051 | CMS4         | primary | Female | 34 | IV | T3 | N0 | M1 | Left  | Y | FOLFO)1 | 0 | 1   | 28 | pMMR | -    | + | M  | WT |    |
| GSM972052 | CMS2         | primary | Male   | 68 | II | T2 | N0 | M0 | Left  | N |         | 0 | 15  | 0  | 15   | pMMR |   | +  | M  | WT |
| GSM972053 | CMS2         | primary | Male   | 55 | II | T2 | N0 | M0 | Right | N |         | 0 | 29  | 0  | 29   | pMMR | - | +  | WT | WT |
| GSM972054 | CMS4         | primary | Male   | 82 | II | T3 | N0 | M0 | Right | N |         | 0 | 26  | 0  | 26   | pMMR | - | +  | M  | WT |
| GSM972055 | Undetermined | primary | Female | 31 | II | T4 | N0 | M0 | Left  | N |         | 0 | 93  | 0  | 93   |      | - | -  | WT | WT |
| GSM972056 | CMS1         | primary | Female | 78 | II | T4 | N0 | M0 | Right | N |         | 0 | 92  | 0  | 92   |      | + | -  | WT | M  |
| GSM972057 | CMS2         | primary | Male   | 70 | II | T3 | N0 | M0 | Left  | N |         | 0 | 26  | 1  | 26   |      | - | +  | WT | WT |
| GSM972058 | CMS1         | primary | Female | 75 | II | T3 | N0 | M0 | Right | N |         | 0 | 60  | 0  | 60   |      | + | -  | WT | M  |
| GSM972059 | CMS1         | primary | Female | 76 | II | T3 | N0 | M0 | Left  | N |         | 0 | 59  | 0  | 59   |      | + | -  | WT | M  |
| GSM972060 | CMS2         | primary | Male   | 66 | II | T3 | N0 | M0 | Left  | N |         | 0 | 82  | 0  | 82   |      | - | +  | WT | WT |
| GSM972061 | CMS2         | primary | Female | 78 | II | T4 | N0 | M0 | Left  | N |         | 0 | 43  | 1  | 43   |      | - | +  | WT | WT |
| GSM972062 | CMS2         | primary | Female | 43 | II | T4 | N0 | M0 | Left  | Y | FOLFO)1 | 0 | 1   | 23 | pMMR | -    | + | M  | WT |    |
| GSM972063 | CMS2         | primary | Male   | 54 | II | T3 | N0 | M0 | Left  | N |         | 0 | 70  | 0  | 70   |      | - | +  | M  | WT |
| GSM972064 | CMS4         | primary | Male   | 60 | IV | T4 | N0 | M1 | Left  | Y | FOLFIR  | 1 | 0   | 1  | 22   |      | - | +  | M  | WT |
| GSM972065 | CMS2         | primary | Male   | 48 | II | T3 | N0 | M0 | Left  | Y | FUFOL   | 0 | 46  | 0  | 46   |      | - | +  | WT | WT |
| GSM972066 | CMS2         | primary | Male   | 69 | IV | T4 | N0 | M1 | Left  | Y | FOLFO)1 | 0 | 0   | 49 |      | -    | + | WT | WT |    |
| GSM972067 | CMS4         | primary | Female | 83 | II | T3 | N0 | M0 | Left  | N |         | 0 | 183 | 1  | 183  |      | - | +  | WT | WT |
| GSM972068 | CMS4         | primary | Male   | 44 | II | T4 | N0 | M0 | Left  | Y | FUFOL   | 1 | 3   | 1  | 22   |      | - | +  | M  | WT |
| GSM972069 | CMS2         | primary | Male   | 68 | II | T3 | N0 | M0 | Right | N |         | 0 | 201 | 0  | 201  |      | - | +  | M  | WT |
| GSM972070 | CMS3         | primary | Female | 64 | II | T4 | N0 | M0 | Left  | Y | FUFOL   | 0 | 68  | 1  | 68   |      | - | +  | M  | WT |
| GSM972071 | CMS2         | primary | Female | 68 | II | T3 | N0 | M0 | Left  | N |         | 0 | 183 | 0  | 183  |      | - | +  | WT | WT |

|           |              |         |        |    |     |    |    |    |       |   |       |   |     |   |     |      |   |   |  |    |    |
|-----------|--------------|---------|--------|----|-----|----|----|----|-------|---|-------|---|-----|---|-----|------|---|---|--|----|----|
| GSM972072 | CMS1         | primary | Female | 70 | II  | T4 | N0 | M0 | Right | N |       | 0 | 172 | 0 | 172 |      | + | + |  | WT | M  |
| GSM972073 | Undetermined | primary | Female | 80 | II  | T3 | N0 | M0 | Right | N |       | 0 | 163 | 0 | 163 |      | + | + |  | M  | WT |
| GSM972074 | CMS2         | primary | Female | 70 | II  | T4 | N0 | M0 | Left  | Y | FUFOL | 1 | 1   | 1 | 75  |      | - |   |  | WT | WT |
| GSM972075 | Undetermined | primary | Male   | 42 | II  | T4 | N0 | M0 | Left  | N |       | 0 | 44  | 1 | 44  |      | - | + |  | WT | WT |
| GSM972076 | CMS1         | primary | Male   | 48 | II  | T3 | N0 | M0 | Right | N |       | 0 | 153 | 0 | 153 |      | - | - |  | WT | WT |
| GSM972077 | Undetermined | primary | Female | 58 | II  | T3 | N0 | M0 | Left  | N |       | 1 | 26  | 1 | 31  |      | - | + |  | M  | WT |
| GSM972078 | CMS2         | primary | Male   | 63 | II  | T3 | N0 | M0 | Left  | Y | FOLFO | 1 | 54  | 1 | 145 |      | - | + |  | WT | WT |
| GSM972079 | Undetermined | primary | Male   | 44 | II  | T3 | N0 | M0 | Left  | Y | 5FU   | 0 | 168 | 0 | 168 |      | - | + |  | WT | WT |
| GSM972080 | CMS1         | primary | Male   | 61 | II  | T4 | N0 | M0 | Left  | Y | other | 1 | 53  | 0 | 165 |      | + | + |  | M  | WT |
| GSM972081 | CMS2         | primary | Female | 68 | II  | T3 | N0 | M0 | Left  | N |       | 0 | 26  | 0 | 26  |      | - | + |  | M  | WT |
| GSM972082 | Undetermined | primary | Male   | 75 | II  | T3 | N0 | M0 | Left  | Y | other | 1 | 119 | 1 | 132 |      | - | + |  | M  | WT |
| GSM972083 | Undetermined | primary | Female | 65 | II  | T3 | N0 | M0 | Left  | N |       | 0 | 127 | 0 | 127 |      | - | + |  | WT | WT |
| GSM972084 | Undetermined | primary | Female | 73 | II  | T3 | N0 | M0 | Left  | N |       | 0 | 129 | 0 | 129 |      | - | - |  | WT | WT |
| GSM972085 | CMS2         | primary | Male   | 56 | II  | T3 | N0 | M0 | Right | N |       | 0 | 97  | 0 | 97  |      | - | + |  | WT | WT |
| GSM972086 | CMS2         | primary | Male   | 81 | II  | T3 | N0 | M0 | Left  | N |       | 0 | 43  | 1 | 43  | pMMR | - | + |  | WT | WT |
| GSM972087 | CMS2         | primary | Female | 84 | II  | T3 | N0 | M0 | Right | N |       | 1 | 8   | 1 | 32  | pMMR | - | + |  | WT | WT |
| GSM972088 | CMS4         | primary | Female | 73 | II  | T4 | N0 | M0 | Left  | N |       | 0 | 79  | 0 | 79  | pMMR | - | - |  | WT | WT |
| GSM972089 | CMS4         | primary | Female | 68 | II  | T3 | N0 | M0 | Right | N |       | 0 | 87  | 0 | 87  | pMMR | + | - |  | WT | WT |
| GSM972090 | CMS2         | primary | Female | 72 | II  | T3 | N0 | M0 | Left  | N |       | 0 | 69  | 0 | 69  | pMMR | - | + |  | WT | WT |
| GSM972091 | Undetermined | primary | Male   | 67 | II  | T3 | N0 | M0 | Left  | N |       | 1 | 45  | 0 | 70  | pMMR | - | + |  | M  | WT |
| GSM972092 | CMS4         | primary | Female | 76 | II  | T3 | N0 | M0 | Left  | N |       | 0 | 47  | 0 | 47  | pMMR | - | + |  | M  | WT |
| GSM972093 | Undetermined | primary | Female | 55 | II  | T4 | N0 | M0 | Left  | Y | FUFOL | 0 | 74  | 0 | 74  | pMMR | - | + |  | WT | WT |
| GSM972094 | Undetermined | primary | Female | 67 | II  | T3 | N0 | M0 | Right | N |       | 0 | 61  | 0 | 61  | pMMR | - | - |  | M  | WT |
| GSM972095 | Undetermined | primary | Male   | 50 | II  | T3 | N0 | M0 | Left  | N |       | 0 | 67  | 0 | 67  | pMMR | - | + |  | M  | WT |
| GSM972096 | CMS2         | primary | Female | 63 | III | T2 | N1 | M0 | Left  | Y | 5FU   | 1 | 3   | 0 | 15  | pMMR | - | - |  | WT | WT |
| GSM972097 | CMS4         | primary | Male   | 64 | III | T4 | N1 | M0 | Right | Y | 5FU   | 1 | 12  | 1 | 12  | pMMR | - | + |  | M  | WT |
| GSM972098 | CMS3         | primary | Male   | 66 | III | T4 | N2 | M0 | Left  | Y | 5FU   | 0 | 15  | 1 | 15  | pMMR | + | + |  | M  | WT |
| GSM972099 | CMS2         | primary | Male   | 78 | III | T3 | N1 | M0 | Left  | Y | 5FU   | 0 | 15  | 0 | 15  | pMMR | - |   |  | WT | WT |
| GSM972100 | CMS3         | primary | Female | 71 | III | T4 | N2 | M0 | Right | Y | 5FU   | 0 | 25  | 0 | 25  | pMMR | - |   |  | M  | WT |
| GSM972101 | CMS3         | primary | Male   | 56 | III | T3 | N1 | M0 | Left  | Y | 5FU   | 1 | 21  | 0 | 35  | pMMR |   |   |  |    |    |
| GSM972102 | Undetermined | primary | Male   | 22 | III | T3 | N1 | M0 | Left  | Y | 5FU   | 0 | 46  | 0 | 46  | pMMR |   |   |  |    |    |
| GSM972103 | Undetermined | primary | Male   | 66 | III | T3 | N2 | M0 | Left  | Y | 5FU   | 1 | 28  | 0 | 58  | pMMR | - | + |  | M  | WT |
| GSM972104 | CMS4         | primary | Female | 72 | III | T3 | N3 | M0 | Right | Y | 5FU   | 0 | 41  | 0 | 41  | pMMR | - | + |  | M  | WT |
| GSM972105 | CMS2         | primary | Male   | 53 | III | T2 | N3 | M0 | Left  | Y | 5FU   | 0 | 32  | 0 | 32  | pMMR | - | + |  | WT | WT |
| GSM972106 | CMS2         | primary | Female | 96 | III | T3 | N1 | M0 | Left  | Y | 5FU   | 1 | 9   | 0 | 72  | pMMR |   |   |  |    |    |
| GSM972107 | Undetermined | primary | Male   | 76 | III | T3 | N1 | M0 | Left  | Y | 5FU   | 0 | 60  | 1 | 60  | pMMR | - | + |  | WT | WT |
| GSM972108 | CMS2         | primary | Male   | 64 | III | T4 | N1 | M0 | Left  | Y | 5FU   | 0 | 103 | 0 | 103 | pMMR |   |   |  |    |    |
| GSM972109 | Undetermined | primary | Male   | 96 | III | T3 | N1 | M0 | Right | Y | 5FU   | 0 | 36  | 0 | 36  | pMMR | - | + |  | WT | WT |
| GSM972110 | CMS3         | primary | Male   | 76 | III | T4 | N2 | M0 | Right | Y | 5FU   | 1 | 4   | 1 | 7   | pMMR |   |   |  |    |    |
| GSM972111 | CMS3         | primary | Male   | 63 | III | T3 | N2 | M0 | Left  | Y | 5FU   | 1 | 13  | 0 | 22  | pMMR |   |   |  |    |    |
| GSM972112 | CMS4         | primary | Female | 64 | III | T3 | N2 | M0 | Right | Y | 5FU   | 0 | 32  | 1 | 32  | pMMR |   |   |  |    |    |



|           |              |         |        |    |     |    |    |    |       |   |        |   |     |   |     |      |   |   |    |    |    |
|-----------|--------------|---------|--------|----|-----|----|----|----|-------|---|--------|---|-----|---|-----|------|---|---|----|----|----|
| GSM972113 | CMS4         | primary | Female | 63 | III | T3 | N1 | M0 | Right | Y | 5FU    | 1 | 18  | 0 | 27  | pMMR |   |   |    |    |    |
| GSM972114 | CMS3         | primary | Male   | 73 | III | T3 | N1 | M0 | Right | Y | 5FU    | 0 | 46  | 0 | 46  | pMMR | - | - | WT | M  |    |
| GSM972115 | CMS2         | primary | Female | 59 | III | T3 | N3 | M0 | Left  | Y | 5FU    | 1 | 11  | 1 | 75  | pMMR | - | + | WT | WT |    |
| GSM972116 | Undetermined | primary | Female | 79 | III | T3 | N2 | M0 | Left  | Y | 5FU    | 1 | 2   | 1 | 29  | pMMR | - | + | WT | WT |    |
| GSM972117 | CMS3         | primary | Female | 78 | III | T3 | N1 | M0 | Right | Y | 5FU    | 1 | 11  | 0 | 32  |      | + | - | WT | M  |    |
| GSM972118 | Undetermined | primary | Male   | 64 | III | T3 | N2 | M0 | Left  | Y | 5FU    | 1 | 19  | 0 | 30  | pMMR | - | + | M  | WT |    |
| GSM972119 | CMS2         | primary | Male   | 96 | III | T4 | N1 | M0 | Left  | Y | 5FU    | 1 | 25  | 0 | 37  | pMMR |   |   |    |    |    |
| GSM972120 | Undetermined | primary | Female | 96 | III | T3 | N1 | M0 | Right | Y | 5FU    | 0 | 36  | 0 | 36  | pMMR |   |   |    |    |    |
| GSM972121 | CMS3         | primary | Male   | 96 | III | T3 | N1 | M0 | Left  | Y | 5FU    | 0 | 35  | 0 | 35  | pMMR | - | + | M  | WT |    |
| GSM972122 | CMS2         | primary | Female | 97 | III | T4 | N1 | M0 | Right | Y | 5FU    | 1 | 19  | 1 | 19  | pMMR |   |   |    |    |    |
| GSM972123 | CMS2         | primary | Male   | 53 | II  | T3 | N0 | M0 | Right | N |        | 0 | 71  | 0 | 71  | pMMR |   |   |    |    |    |
| GSM972124 | CMS2         | primary | Female | 49 | II  | T3 | N0 | M0 | Left  | Y | FUFOL  | 0 | 75  | 0 | 75  | pMMR | - | + | WT | WT |    |
| GSM972125 | CMS4         | primary | Female | 64 | II  | T3 | N0 | M0 | Left  | Y | FUFOL  | 1 | 14  | 0 | 68  | pMMR | - | + | WT | WT |    |
| GSM972126 | CMS2         | primary | Male   | 61 | II  | T3 | N0 | M0 | Left  | N |        | 0 | 63  | 0 | 63  | pMMR |   |   |    |    |    |
| GSM972127 | Undetermined | primary | Female | 66 | II  | T3 | N0 | M0 | Left  | N |        | 0 | 85  | 0 | 85  | pMMR | - | + | M  | WT |    |
| GSM972128 | CMS2         | primary | Male   | 64 | II  | T3 | N0 | M0 | Left  | Y | FOLFOX | 0 | 93  | 0 | 93  | pMMR | - | + | WT | WT |    |
| GSM972129 | Undetermined | primary | Male   | 76 | II  | T2 | N0 | M0 | Left  | N |        | 0 | 11  | 0 | 11  | pMMR | - | - | M  | WT |    |
| GSM972130 | CMS2         | primary | Male   | 76 | II  | T4 | N0 | M0 | Left  | N |        | 0 | 55  | 0 | 55  | pMMR | - | + | WT | WT |    |
| GSM972131 | CMS4         | primary | Female | 78 | II  | T3 | N0 | M0 | Right | N |        | 0 | 86  | 0 | 86  | pMMR | - | + | M  | WT |    |
| GSM972132 | CMS2         | primary | Female | 87 | II  | T3 | N0 | M0 | Left  | N |        | 0 | 61  | 1 | 61  | pMMR | - | + | M  | WT |    |
| GSM972133 | Undetermined | primary | Male   | 64 | III | T3 |    | M0 | Left  | Y |        | 1 | 27  | 1 | 53  | pMMR |   |   | M  | WT |    |
| GSM972134 | Undetermined | primary | Male   | 74 | III | T3 | N2 | M0 | Left  | N |        | 1 | 7   | 1 | 14  | pMMR |   |   | M  | WT |    |
| GSM972135 | CMS3         | primary | Female | 78 | II  | T3 | N0 | M0 | Left  | N |        | 1 | 4   | 1 | 13  | pMMR |   |   | M  | M  |    |
| GSM972136 | CMS2         | primary | Male   | 54 | III | T3 | N1 | M0 | Left  | Y |        | 1 | 61  | 0 | 130 | pMMR |   |   | WT | WT | WT |
| GSM972137 | CMS2         | primary | Male   | 68 | II  | T3 | N0 | M0 | Left  | Y |        | 1 | 9   | 0 | 129 | pMMR |   |   | M  | WT |    |
| GSM972138 | CMS2         | primary | Male   | 77 | II  | T3 | N0 | M0 | Left  | N |        | 1 | 45  | 1 | 53  | pMMR |   |   | WT | WT |    |
| GSM972139 | CMS2         | primary | Female | 69 | III | T3 | N1 | M0 | Left  | Y |        | 1 | 38  | 0 | 102 | pMMR |   |   | M  | WT |    |
| GSM972140 | CMS4         | primary | Male   | 64 | II  | T4 | N0 | M0 | Left  | N |        | 1 | 56  | 0 | 172 | pMMR |   |   | WT | M  |    |
| GSM972141 | CMS2         | primary | Male   | 58 | III | T3 | N2 | M0 | Left  | Y |        | 1 | 15  | 0 | 84  | pMMR |   |   | M  | WT |    |
| GSM972142 | CMS2         | primary | Female | 86 | III | T3 | N2 | M0 | Right | N |        | 1 | 2   | 1 | 35  | pMMR | - | + | M  | M  | WT |
| GSM972143 | CMS2         | primary | Male   | 57 | II  | T4 | N0 | M0 | Left  | N |        | 0 | 154 | 0 | 154 | pMMR |   |   | WT | WT | WT |
| GSM972144 | CMS2         | primary | Female | 63 | II  | T3 | N0 | M0 | Left  | N |        | 0 | 121 | 0 | 121 | pMMR | - | + | M  | WT | WT |
| GSM972145 | CMS2         | primary | Female | 63 | III | T3 | N2 | M0 | Left  | Y |        | 0 | 135 | 0 | 135 | pMMR |   |   | M  | WT |    |
| GSM972146 | CMS1         | primary | Male   | 60 | III | T3 | N2 | M0 | Left  | Y |        | 0 | 66  | 0 | 66  | pMMR |   |   | M  | M  |    |
| GSM972147 | CMS2         | primary | Male   | 79 | II  | T3 | N0 | M0 | Left  | N |        | 0 | 140 | 0 | 140 | pMMR | - | + | M  | WT | WT |
| GSM972148 | CMS2         | primary | Male   | 59 | III | T3 | N1 | M0 | Left  | Y |        | 0 | 127 | 0 | 127 | pMMR |   |   | M  | M  |    |
| GSM972149 | CMS2         | primary | Male   | 64 | II  | T3 | N0 | M0 | Left  | N |        | 0 | 132 | 0 | 132 | pMMR |   |   | WT | WT |    |
| GSM972150 | CMS2         | primary | Female | 55 | III | T3 | N1 | M0 | Left  | Y |        | 0 | 109 | 0 | 109 | pMMR |   |   | M  | WT |    |
| GSM972151 | CMS2         | primary | Female | 75 | III | T3 | N1 | M0 | Left  | Y |        | 0 | 77  | 0 | 77  | pMMR |   |   | WT | M  |    |
| GSM972152 | CMS2         | primary | Female | 70 | III | T3 | N1 | M0 | Right | Y |        | 0 | 56  | 0 | 56  | pMMR |   |   | WT | M  |    |
| GSM972153 | CMS2         | primary | Male   | 71 | II  | T3 | N0 | M0 | Left  | N |        | 0 | 66  | 1 | 66  | pMMR |   |   | M  | WT | WT |

|           |              |         |        |    |     |    |    |    |       |   |     |   |     |   |     |      |   |    |    |    |    |
|-----------|--------------|---------|--------|----|-----|----|----|----|-------|---|-----|---|-----|---|-----|------|---|----|----|----|----|
| GSM972154 | CMS2         | primary | Female | 49 | III | T4 | N2 | M0 | Left  | Y |     | 1 | 3   | 1 | 44  | pMMR |   | M  | M  |    |    |
| GSM972155 | CMS2         | primary | Male   | 42 | III | T3 | N2 | M0 | Left  | Y |     | 1 | 6   | 1 | 24  | pMMR |   | M  | M  |    |    |
| GSM972156 | CMS2         | primary | Male   | 67 | III | T3 | N1 | M0 | Left  | Y |     | 0 | 112 | 1 | 112 | pMMR |   | WT | WT |    |    |
| GSM972157 | CMS2         | primary | Male   | 57 | III | T3 | N1 | M0 | Left  | Y |     | 0 | 118 | 0 | 118 | pMMR |   | WT | WT |    |    |
| GSM972158 | CMS4         | primary | Female | 45 | III | T3 | N2 | M0 | Right | Y |     | 0 | 120 | 0 | 120 | pMMR |   | M  | M  |    |    |
| GSM972159 | CMS3         | primary | Male   | 67 | III | T3 | N1 | M0 | Right | Y |     | 0 | 93  | 0 | 93  | pMMR | - | +  | WT | M  | WT |
| GSM972160 | CMS2         | primary | Male   | 73 | II  | T3 | N0 | M0 | Left  | N |     | 1 | 39  | 0 | 77  | pMMR |   | M  | WT |    |    |
| GSM972161 | CMS2         | primary | Female | 91 | II  | T3 | N0 | M0 | Left  | N |     | 1 | 9   | 1 | 11  | pMMR |   | WT | M  |    |    |
| GSM972162 | Undetermined | primary | Female | 73 | III | T3 | N1 | M0 | Left  | Y |     | 0 | 77  | 0 | 77  | pMMR |   | M  | WT |    |    |
| GSM972163 | Undetermined | primary | Male   | 71 | II  | T4 | N0 | M0 | Left  | Y |     | 0 | 41  | 0 | 41  | pMMR |   | M  | WT |    |    |
| GSM972164 | CMS2         | primary | Male   | 70 | III | T3 |    | M0 | Left  | Y | 5FU | 1 | 3   | 1 | 69  | pMMR |   | WT | WT |    |    |
| GSM972165 | Undetermined | primary | Male   | 67 | II  | T4 | N0 | M0 | Right | N |     | 1 | 36  | 1 | 87  | pMMR |   | M  | WT |    |    |
| GSM972166 | CMS2         | primary | Female | 42 | III | T3 |    | M0 | Left  | Y | 5FU | 1 | 3   | 1 | 12  | pMMR |   | WT | M  |    |    |
| GSM972167 | CMS2         | primary | Male   | 47 | II  | T3 | N0 | M0 | Left  | N |     | 1 | 36  | 1 | 45  | pMMR | - | +  | WT | WT | WT |
| GSM972168 | CMS1         | primary | Male   | 76 | III | T4 |    | M0 | Right | N |     | 1 | 4   | 1 | 8   | pMMR |   | WT | WT |    |    |
| GSM972169 | CMS2         | primary | Male   | 50 | II  | T4 | N0 | M0 | Left  | N |     | 0 | 164 | 0 | 164 | pMMR |   | WT | WT |    |    |
| GSM972170 | CMS2         | primary | Female | 67 | III | T2 | N2 | M0 | Left  | N |     | 0 | 73  | 0 | 73  | pMMR |   | WT | WT |    |    |
| GSM972171 | CMS1         | primary | Female | 70 | III | T4 | N1 | M0 | Right | N |     | 0 | 130 | 0 | 130 | pMMR |   | WT | WT |    |    |
| GSM972172 | CMS2         | primary | Female | 88 | II  | T4 | N0 | M0 | Right | N |     | 1 | 4   | 1 | 5   | pMMR | + | +  | M  | M  | WT |
| GSM972173 | CMS2         | primary | Female | 59 | II  | T4 | N0 | M0 | Left  | Y |     | 1 | 15  | 1 | 26  | pMMR | - |    | WT | M  | WT |
| GSM972174 | CMS2         | primary | Male   | 75 | III | T3 | N1 | M0 | Left  | Y |     | 0 | 97  | 0 | 97  | pMMR | - | +  | M  | WT | WT |
| GSM972175 | CMS2         | primary | Female | 83 | III | T3 | N1 | M0 | Left  | N |     | 1 | 28  | 1 | 43  | pMMR | - | +  | WT | M  | WT |
| GSM972176 | CMS4         | primary | Female | 85 | III | T4 | N2 | M0 | Right | N |     | 1 | 35  | 1 | 36  | pMMR | - | +  | M  | WT | WT |
| GSM972177 | CMS2         | primary | Male   | 71 | II  |    |    |    | Right | N |     | 1 | 20  | 1 | 22  | pMMR | - |    | M  | M  | WT |
| GSM972178 | CMS3         | primary | Female | 69 | III |    |    |    | Right | Y |     | 1 | 21  | 0 | 67  | pMMR | - | +  | WT | M  | WT |
| GSM972179 | Undetermined | primary | Male   | 77 | II  |    |    |    | Left  | N |     | 1 | 17  | 1 | 18  | pMMR |   | M  | WT | WT |    |
| GSM972180 | CMS1         | primary | Female | 66 | II  |    |    |    | Left  | Y |     | 1 | 19  | 1 | 24  | pMMR | + |    | M  | WT | WT |
| GSM972181 | CMS4         | primary | Male   | 69 | III |    |    |    | Right | Y |     | 1 | 13  | 1 | 34  | pMMR |   | WT | M  | WT |    |
| GSM972182 | CMS2         | primary | Male   | 53 | II  | T4 | N0 | M0 | Left  | N |     | 1 | 23  | 1 | 58  | pMMR | - | +  | WT | WT | WT |
| GSM972183 | CMS3         | primary | Female | 62 | III |    |    |    | Left  | Y |     | 1 | 11  | 1 | 32  | pMMR |   | M  | M  | WT |    |
| GSM972184 | CMS1         | primary | Female | 70 | II  |    |    |    | Right | N |     | 1 | 4   | 1 | 39  | pMMR | + |    | WT | WT | M  |
| GSM972185 | CMS2         | primary | Female | 58 | III |    |    |    | Left  | Y |     | 1 | 22  | 0 | 39  | pMMR | - |    | M  | WT | WT |
| GSM972186 | CMS4         | primary | Female | 50 | III |    |    |    | Right | Y |     | 1 | 14  | 1 | 47  | pMMR | - |    | WT | M  | WT |
| GSM972187 | CMS4         | primary | Male   | 62 | II  | T3 | N0 | M0 | Right | N |     | 1 | 9   | 0 | 49  | pMMR |   | M  | WT | WT |    |
| GSM972188 | CMS2         | primary | Female | 58 | III | T3 | N2 | M0 | Left  | Y |     | 1 | 11  | 0 | 22  | pMMR | - | +  | WT | M  | WT |
| GSM972189 | CMS2         | primary | Male   | 63 | III | T4 |    | M0 | Right | N |     | 0 | 192 | 0 | 192 | pMMR | - | +  | M  | WT | WT |
| GSM972190 | CMS2         | primary | Male   | 68 | II  | T3 | N0 | M0 | Left  | Y | 5FU | 0 | 108 | 0 | 108 | pMMR | - | +  | M  | WT | WT |
| GSM972191 | CMS3         | primary | Male   | 49 | III | T3 | N1 | M0 | Left  | Y | 5FU | 0 | 122 | 0 | 122 | pMMR | - | +  | WT | M  | WT |
| GSM972192 | Undetermined | primary | Female | 72 | II  | T3 | N0 | M0 | Right | N |     | 0 | 158 | 0 | 158 | pMMR | - | +  | M  | M  | WT |
| GSM972193 | CMS2         | primary | Female | 51 | III | T3 | N1 | M0 | Left  | Y |     | 0 | 73  | 0 | 73  | pMMR | - | +  | M  | M  | WT |
| GSM972194 | CMS2         | primary | Male   | 43 | III | T3 | N2 | M0 | Left  | Y |     | 0 | 83  | 0 | 83  | pMMR | - |    | M  | WT | WT |

|           |              |         |        |    |     |    |    |    |       |   |        |     |    |     |      |      |   |    |    |    |    |
|-----------|--------------|---------|--------|----|-----|----|----|----|-------|---|--------|-----|----|-----|------|------|---|----|----|----|----|
| GSM972195 | CMS3         | primary | Female | 54 | II  | T3 | N0 | M0 | Right | Y | 0      | 120 | 0  | 120 | pMMR | -    | + | WT | M  | WT |    |
| GSM972196 | CMS1         | primary | Female | 69 | II  | T3 | N0 | M0 | Right | N | 0      | 73  | 0  | 73  | pMMR | +    |   | WT | M  | WT |    |
| GSM972197 | CMS3         | primary | Female | 78 | II  | T3 | N0 | M0 | Right | N | 0      | 50  | 0  | 50  | pMMR | +    | + | WT | WT | M  |    |
| GSM972198 | CMS2         | primary | Female | 52 | III | T3 | N1 | M0 | Left  | Y | 0      | 57  | 0  | 57  | pMMR | -    | + | M  | M  | WT |    |
| GSM972199 | CMS2         | primary | Male   | 73 | III | T3 | N2 | M0 | Left  | Y | 0      | 66  | 0  | 66  | pMMR | -    | + | M  | WT | WT |    |
| GSM972200 | CMS2         | primary | Male   | 61 | II  | T3 | N0 | M0 | Left  | N | 0      | 54  | 0  | 54  | pMMR | -    | + | WT | WT | WT |    |
| GSM972201 | CMS4         | primary | Male   | 78 | III | T3 | N2 | M0 | Right | Y | 0      | 67  | 0  | 67  | pMMR | -    | + | WT | WT | WT |    |
| GSM972202 | CMS2         | primary | Female | 57 | III | T3 | N1 | M0 | Left  | Y | 0      | 53  | 0  | 53  | pMMR | -    | + | M  | WT | WT |    |
| GSM972203 | CMS2         | primary | Female | 66 | III | T3 | N2 | M0 | Left  | Y | 0      | 54  | 0  | 54  | pMMR |      | + | M  | WT | WT |    |
| GSM972204 | CMS2         | primary | Male   | 78 | II  |    |    |    | Left  | Y | 1      | 4   | 0  | 44  | pMMR | -    |   | M  | WT | WT |    |
| GSM972205 | CMS2         | primary | Male   | 76 | II  |    |    |    | Left  | N | 1      | 7   | 1  | 35  | pMMR | -    | + | WT | WT | WT |    |
| GSM972206 | Undetermined | primary | Male   | 74 | II  |    |    |    | Left  | N | 1      | 0   | 0  | 42  | pMMR | -    | + | WT | M  | WT |    |
| GSM972207 | CMS2         | primary | Male   | 65 | III | T3 | N1 | M0 | Left  | Y | 1      | 34  | 0  | 82  | pMMR | -    | + | M  | WT | WT |    |
| GSM972208 | CMS4         | primary | Male   | 63 | IV  | T4 | N2 | M1 | Left  |   | 1      | 0   | 1  | 25  | pMMR | -    | + | M  | WT | WT |    |
| GSM972209 | CMS1         | primary | Male   | 54 | IV  | T3 | N2 | M1 | Right |   | 1      | 0   | 1  | 13  | pMMR | +    |   | M  | WT | M  |    |
| GSM972210 | CMS2         | primary | Male   | 50 | IV  | T3 |    | M1 | Left  |   | 1      | 0   | 1  | 46  | pMMR | -    | + | M  | WT | WT |    |
| GSM972211 | CMS2         | primary | Male   | 65 | III | T3 | N1 | M0 | Left  | Y | 0      | 57  | 0  | 57  | pMMR | -    | + | M  | WT | WT |    |
| GSM972212 | CMS3         | primary | Female | 54 | IV  | T3 | N1 | M1 | Left  |   | 1      | 0   | 1  | 18  | pMMR | -    |   | M  | M  | WT |    |
| GSM972213 | Undetermined | primary | Female | 71 | IV  | T3 | N0 | M1 | Left  |   | 1      | 0   | 1  | 1   | pMMR | -    |   | M  | M  | WT |    |
| GSM972214 | Undetermined | primary | Female | 88 | IV  | T3 | N2 | M1 | Right |   | 1      | 0   | 1  | 2   | pMMR | +    | - | M  | WT | M  |    |
| GSM972215 | Undetermined | primary | Female | 73 | III | T4 | N2 | M0 | Right | Y | 0      | 47  | 0  | 47  | pMMR | +    |   | M  | M  | WT |    |
| GSM972216 | CMS2         | primary | Female | 45 | IV  | T3 | N2 | M1 | Left  |   | 1      | 0   | 0  | 94  | pMMR | -    |   | M  | WT | WT |    |
| GSM972217 | CMS2         | primary | Male   | 73 | IV  | T3 | N1 | M1 | Left  |   | 1      | 0   | 0  | 70  | pMMR | -    |   | M  | M  | WT |    |
| GSM972218 | CMS3         | primary | Female | 75 | IV  | T4 | N3 | M1 | Right |   | 1      | 0   | 1  | 7   | pMMR | -    |   | WT | M  | WT |    |
| GSM972219 | CMS2         | primary | Male   | 60 | IV  | T3 | N2 | M1 | Left  |   | 1      | 0   | 0  | 53  | pMMR | -    |   | M  | M  | WT |    |
| GSM972220 | CMS1         | primary | Male   | 81 | III | T3 | N1 | M0 | Right | N | 0      | 1   | 0  | 1   | dMMR | +    | - |    | WT | M  |    |
| GSM972221 | CMS1         | primary | Female | 75 | II  | T3 | N0 | M0 | Right | N | 0      | 65  | 0  | 65  | dMMR | +    | - |    | WT | M  |    |
| GSM972222 | CMS1         | primary | Female | 69 | II  | T3 | N0 | M0 | Right | N | 0      | 57  | 0  | 57  | dMMR | -    | - |    | WT | WT |    |
| GSM972223 | CMS1         | primary | Male   | 78 | II  | T3 | N0 | M0 | Right | N | 0      | 33  | 1  | 33  | dMMR | +    | - |    | WT | M  |    |
| GSM972224 | CMS1         | primary | Male   | 74 | III | T4 | N2 | M0 | Right | Y | 5FU    | 1   | 20 | 1   | 25   | dMMR |   | -  |    |    |    |
| GSM972225 | Undetermined | primary | Male   | 51 | II  | T3 | N0 | M0 | Left  | Y | FUFOL  | 0   | 37 | 0   | 37   | pMMR | + | +  |    | WT | WT |
| GSM972226 | CMS3         | primary | Male   | 57 | II  | T4 | N0 | M0 | Right | N |        | 0   | 20 | 0   | 20   | dMMR | + | -  |    | M  | WT |
| GSM972227 | CMS3         | primary | Male   | 61 | IV  | T3 | N2 | M1 | Right | Y | FOLFO) | 0   | 20 | 1   | 20   | pMMR | - | -  |    | M  | WT |
| GSM972228 | CMS3         | primary | Male   | 68 | II  | T3 | N0 | M0 | Right | N |        | 0   | 1  | 0   | 1    | pMMR | + | -  |    | WT | M  |
| GSM972229 | CMS1         | primary | Female | 81 | II  | T3 | N0 | M0 | Left  | N |        | 0   | 0  | 0   | 0    | dMMR | - | +  |    | M  | WT |
| GSM972230 | CMS2         | primary | Male   | 55 | III | T3 | N1 | M0 | Left  | Y | FOLFO) | 0   | 27 | 0   | 27   | pMMR | - | +  |    | WT | WT |
| GSM972231 | CMS4         | primary | Male   | 54 | IV  | T3 | N1 | M1 | Left  | Y | FOLFO) | 0   | 14 | 0   | 14   | pMMR | - | +  |    | WT | WT |
| GSM972232 | CMS4         | primary | Male   | 69 | IV  | T4 | N2 | M1 | Left  | Y | FOLFO) | 0   | 21 | 0   | 21   | pMMR | - | +  |    | M  | WT |
| GSM972233 | CMS2         | primary | Male   | 67 | II  | T3 | N0 | M0 | Left  | N |        | 0   | 15 | 0   | 15   | pMMR | - | +  |    | WT | WT |
| GSM972234 | CMS4         | primary | Male   | 79 | IV  | T3 | N1 | M1 | Right | Y | 5FU    | 0   | 10 | 1   | 10   | pMMR | - | +  |    | WT | WT |
| GSM972235 | Undetermined | primary | Female | 57 | III | T2 | N1 | M0 | Left  | Y | FOLFO) | 0   | 7  | 0   | 7    | pMMR | - | +  |    | M  | WT |

|           |              |         |        |    |     |     |    |    |       |   |         |    |    |    |      |      |   |    |    |    |
|-----------|--------------|---------|--------|----|-----|-----|----|----|-------|---|---------|----|----|----|------|------|---|----|----|----|
| GSM972236 | CMS2         | primary | Male   | 71 | IV  | T1  | N0 | M1 | Left  | Y | FOLFO)0 | 12 | 0  | 12 | pMMR | -    | + | WT | WT |    |
| GSM972237 | CMS2         | primary | Female | 55 | I   | T1  | N0 | M0 | Left  | N |         | 0  | 25 | 0  | 25   | pMMR | - | +  | WT | WT |
| GSM972238 | Undetermined | primary | Female | 53 | III | T2  | N1 | M0 | Left  | Y | FOLFO)0 | 19 | 0  | 19 | pMMR | -    | + | WT | WT |    |
| GSM972239 | Undetermined | primary | Male   | 59 | II  | T3  | N0 | M0 | Left  | N |         | 0  | 14 | 0  | 14   | pMMR | - | -  | WT | WT |
| GSM972240 | CMS4         | primary | Female | 67 | IV  | T3  | N1 | M1 | Left  | Y | FOLFO)0 | 14 | 0  | 14 | pMMR | -    | + | WT | WT |    |
| GSM972241 | CMS1         | primary | Male   | 61 | II  | T3  | N0 | M0 | Left  | N |         | 0  | 17 | 1  | 17   | dMMR | - | -  | WT | WT |
| GSM972242 | Undetermined | primary | Male   | 69 | I   | T2  | N0 | M0 | Right | N |         | 0  | 17 | 0  | 17   | pMMR | - | -  | M  | WT |
| GSM972243 | CMS2         | primary | Male   | 66 | II  | T3  | N0 | M0 | Left  | N |         | 0  | 2  | 0  | 2    | pMMR | - | +  | M  | WT |
| GSM972244 | Undetermined | primary | Female | 51 | I   | T1  | N0 | M0 | Left  | N |         | 0  | 14 | 0  | 14   | pMMR | - |    | WT | WT |
| GSM972245 | Undetermined | primary | Male   | 77 | IV  | T4  | N1 | M1 | Left  | N |         | 0  | 0  | 1  | 0    | pMMR | - | +  | M  | WT |
| GSM972246 | CMS2         | primary | Female | 92 | III | T3  | N1 | M0 | Left  | N |         | 0  | 0  | 0  | 0    | pMMR | - | +  | WT | WT |
| GSM972247 | CMS2         | primary | Male   | 79 | II  | T4  | N0 | M0 | Left  | N |         | 0  | 6  | 0  | 6    | pMMR | - | +  | WT | WT |
| GSM972248 | CMS2         | primary | Male   | 58 | II  | T3  | N0 | M0 | Right | N |         | 0  | 14 | 0  | 14   | pMMR | + | +  |    |    |
| GSM972249 | CMS2         | primary | Female | 74 | I   | T1  | N0 | M0 | Right | N |         | 0  | 14 | 0  | 14   | pMMR | + | +  | M  | WT |
| GSM972250 | CMS2         | primary | Male   | 52 | III | T3  | N1 | M0 | Left  | Y | FOLFO)0 | 12 | 0  | 12 | pMMR | -    | + | M  | WT |    |
| GSM972251 | CMS4         | primary | Male   | 57 | IV  | T4  | N1 | M1 | Left  | Y |         | 0  | 7  | 1  | 7    | pMMR | - | +  | M  | WT |
| GSM972252 | Undetermined | primary | Female | 37 | IV  | T3  | N1 | M1 | Right | Y | FOLFIR  | 0  | 16 | 0  | 16   | pMMR | - | +  | M  | WT |
| GSM972253 | CMS2         | primary | Female | 56 | IV  | T3  | N2 | M1 | Right | Y | FOLFIR  | 0  | 16 | 0  | 16   | pMMR | - | +  | WT | WT |
| GSM972254 | CMS4         | primary | Female | 77 | IV  | T3  | N0 | M1 | Left  | Y | 5FU     | 1  | 9  | 0  | 14   | pMMR | - | +  | WT | WT |
| GSM972255 | CMS4         | primary | Female | 81 | II  | T3  | N0 | M0 | Right | N |         | 0  | 5  | 0  | 5    | pMMR | - | +  | WT | WT |
| GSM972256 | CMS2         | primary | Female | 63 | IV  | T4  | N1 | M1 | Left  | Y | FOLFO)1 | 13 | 0  | 19 | pMMR | -    | + | WT | WT |    |
| GSM972257 | CMS2         | primary | Female | 88 | II  | T4  | N0 | M0 | Left  | N |         | 1  | 9  | 1  | 21   | pMMR | - | +  | M  | WT |
| GSM972258 | CMS2         | primary | Female | 77 | II  | T4  | N0 | M0 | Left  | N |         | 0  | 0  | 1  | 0    | pMMR | - | +  | WT | WT |
| GSM972259 | CMS3         | primary | Female | 72 | II  | T4  | N0 | M0 | Left  | Y | 5FU     | 0  | 29 | 0  | 29   | pMMR | - | +  | M  | WT |
| GSM972260 | CMS2         | primary | Male   | 70 | IV  | T3  | N2 | M1 | Left  | Y | FOLFO)0 | 13 | 0  | 13 | pMMR | -    | + | M  | WT |    |
| GSM972261 | CMS1         | primary | Female | 79 | III | T4  | N1 | M0 | Right | N |         | 0  | 7  | 1  | 7    | dMMR | + | +  | WT | M  |
| GSM972262 | CMS4         | primary | Female | 88 | II  | T4  | N0 | MX | Left  |   |         | 0  | 5  | 0  | 5    | dMMR | + | -  | WT | M  |
| GSM972263 | CMS1         | primary | Male   | 32 | III | T2  | N1 | M0 | Left  | Y | 5FU     | 0  | 76 | 0  | 76   | dMMR | + | -  | WT | WT |
| GSM972264 | CMS1         | primary | Male   | 46 | II  | T3  | N0 | M0 | Right | N |         | 0  | 73 | 0  | 73   | dMMR | - | -  | WT | WT |
| GSM972265 | CMS1         | primary | Female | 78 | III | T3  | N1 | M0 | Right | Y | 5FU     | 0  | 60 | 0  | 60   | dMMR | + | -  | WT | M  |
| GSM972266 | CMS2         | primary | Male   | 56 | IV  | T4  | N2 | M1 | Left  | Y | FOLFO)0 | 20 | 1  | 20 | dMMR | -    | - | WT | WT |    |
| GSM972267 | CMS2         | primary | Male   | 82 | II  | T3  | N0 | M0 | Left  | N |         | 0  | 67 | 1  | 67   | pMMR | - | +  | WT | WT |
| GSM972268 | CMS3         | primary | Male   | 67 | III | T2  | N1 | M0 | Left  | Y | FUFOL   | 0  | 48 | 0  | 48   | pMMR | - | +  | M  | WT |
| GSM972269 | CMS3         | primary | Male   | 70 | I   | T2  | N0 | M0 | Right | N |         | 0  | 79 | 0  | 79   | pMMR | - | +  | M  | WT |
| GSM972270 | CMS1         | primary | Female | 75 | II  | T4  | N0 | M0 | Right | N |         | 0  | 65 | 0  | 65   | dMMR | + | -  | WT | M  |
| GSM972271 | CMS2         | primary | Male   | 92 | III | T4  | N1 | M0 | Right | N |         | 1  | 13 | 1  | 14   | pMMR | - | +  | M  | WT |
| GSM972272 | CMS2         | primary | Female | 47 | IV  | T3  | N1 | M1 | Right | Y | FOLFIR  | 0  | 15 | 1  | 15   | pMMR | + | +  | M  | WT |
| GSM972273 | CMS3         | primary | Male   | 84 | 0   | Tis | N0 | M0 | Left  | N |         | 0  | 16 | 1  | 16   | pMMR | - | +  | M  | WT |
| GSM972274 | CMS1         | primary | Female | 91 | III | T4  | N2 | M0 | Right | N |         | 0  | 57 | 0  | 57   | dMMR | + | -  | WT | M  |
| GSM972275 | CMS1         | primary | Male   | 76 | II  | T4  | N0 | M0 | Right | N |         | 1  | 3  | 1  | 4    | dMMR | + | -  | WT | M  |
| GSM972276 | CMS1         | primary | Male   | 59 | III | T3  | N2 | M0 | Right | Y | 5FU     | 0  | 43 | 0  | 43   | dMMR | - | +  | M  | WT |

|           |              |         |        |    |     |     |    |    |       |   |        |   |     |   |     |      |   |   |  |    |    |
|-----------|--------------|---------|--------|----|-----|-----|----|----|-------|---|--------|---|-----|---|-----|------|---|---|--|----|----|
| GSM972277 | CMS1         | primary | Female | 88 | II  | T4  | N0 | M0 | Right | N |        | 0 | 51  | 0 | 51  | dMMR | + |   |  | WT | M  |
| GSM972278 | CMS1         | primary | Female | 72 | I   | T2  | N0 | M0 | Right | N |        | 0 | 45  | 0 | 45  | dMMR | + | - |  | WT | M  |
| GSM972279 | CMS1         | primary | Female | 67 | III | T3  | N1 | M0 | Right | Y | 5FU    | 0 | 52  | 0 | 52  | dMMR | + | + |  | WT | M  |
| GSM972280 | CMS1         | primary | Female | 79 | II  | T4  | N0 | M0 | Right | N |        | 0 | 46  | 1 | 46  | dMMR | + | + |  | M  | WT |
| GSM972281 | CMS2         | primary | Male   | 64 | I   | T1  | N0 | M0 | Left  | N |        | 0 | 56  | 0 | 56  | pMMR | - | + |  | WT | WT |
| GSM972282 | Undetermined | primary | Female | 79 | I   | T2  | N0 | M0 | Left  | N |        | 0 | 51  | 0 | 51  | dMMR | - | - |  | M  | WT |
| GSM972283 | CMS1         | primary | Male   | 65 | II  | T3  | N0 | M0 | Right | N |        | 0 | 51  | 0 | 51  | dMMR | + | - |  | WT | WT |
| GSM972284 | CMS2         | primary | Female | 63 | IV  | T4  | N2 | M1 | Left  | Y | FOLFIR | 0 | 27  | 1 | 27  | pMMR | - | + |  | M  | WT |
| GSM972285 | Undetermined | primary | Male   | 71 | II  | T2  | N0 | M0 | Left  | N |        | 0 | 2   | 1 | 2   | dMMR | + | - |  | WT | WT |
| GSM972286 | CMS1         | primary | Male   | 24 | II  | T3  | N0 | M0 | Right | N |        | 0 | 37  | 0 | 37  | dMMR | + | - |  | M  | WT |
| GSM972287 | CMS1         | primary | Male   | 77 | II  | T3  | N0 | M0 | Right | N |        | 0 | 43  | 0 | 43  | dMMR | + | - |  | WT | WT |
| GSM972288 | CMS2         | primary | Male   | 53 | IV  | T4  | N1 | M1 | Left  | Y | FOLFIR | 0 | 35  | 1 | 35  | pMMR | - | + |  | WT | WT |
| GSM972289 | CMS2         | primary | Male   | 72 | IV  | T4  | N1 | M1 | Right | Y | 5FU    | 0 | 17  | 1 | 17  | pMMR | - | + |  | M  | WT |
| GSM972290 | Undetermined | primary | Female | 70 | I   | T2  | N0 | M0 | Left  | N |        | 0 | 39  | 0 | 39  | dMMR | - | + |  | WT | WT |
| GSM972291 | Undetermined | primary | Male   | 46 | III | T4  | N2 | M0 | Left  | Y | FOLFO  | 1 | 10  | 0 | 32  | dMMR | - | - |  | M  | WT |
| GSM972292 | CMS1         | primary | Female | 62 | II  | T3  | N0 | M0 | Right | N |        | 0 | 25  | 0 | 25  | dMMR |   | - |  | WT | M  |
| GSM972293 | Undetermined | primary | Male   |    | I   | T2  | N0 | M0 | Right | N |        | 0 | 50  | 0 | 50  | pMMR | - | + |  | M  | WT |
| GSM972294 | CMS1         | primary | Male   | 74 | II  | T3  | N0 | M0 | Left  | N |        | 0 | 25  | 0 | 25  | dMMR |   | + |  | WT | M  |
| GSM972295 | Undetermined | primary | Male   | 68 | III | T4  | N1 | M0 | Right | Y | 5FU    | 0 | 61  | 0 | 61  | pMMR | - | + |  | M  | WT |
| GSM972296 | CMS3         | primary | Female | 77 | 0   | Tis | N0 | M0 | Left  | N |        | 0 | 22  | 0 | 22  | dMMR |   | - |  | M  | WT |
| GSM972297 | Undetermined | primary | Male   | 77 | I   | T1  | N0 | M0 | Right | N |        | 0 | 46  | 1 | 46  | pMMR | + | - |  | M  | WT |
| GSM972298 | CMS1         | primary | Female | 83 | II  | T3  | N0 | M0 | Right | N |        | 0 | 9   | 0 | 9   | dMMR |   | - |  |    |    |
| GSM972299 | CMS2         | primary | Female | 54 | IV  | T4  | N2 | M1 | Left  | Y | FOLFIR | 0 | 41  | 1 | 41  | pMMR | - | + |  | WT | WT |
| GSM972300 | CMS3         | primary | Male   | 75 | 0   | Tis | N0 | M0 | Right | N |        | 0 | 41  | 0 | 41  | pMMR | - | - |  | M  | WT |
| GSM972301 | Undetermined | primary | Male   | 74 | III | T3  | N2 | M0 | Left  | N |        | 0 | 105 | 1 | 105 | pMMR | - | + |  | M  | WT |
| GSM972302 | CMS2         | primary | Male   | 79 | III | T4  | N1 | M0 | Right | N |        | 0 | 27  | 1 | 27  | pMMR | - | + |  | WT | M  |
| GSM972303 | CMS2         | primary | Female | 80 | I   | T2  | N0 | M0 | Left  | N |        | 0 | 19  | 0 | 19  | pMMR | - | + |  | M  | WT |
| GSM972304 | CMS3         | primary | Female | 60 | II  | T3  | N0 | M0 | Left  | Y | FUFOL  | 0 | 30  | 0 | 30  | pMMR | - | - |  | WT | M  |
| GSM972305 | Undetermined | primary | Female | 82 | III | T4  | N2 | M0 | Right | N |        | 0 | 31  | 0 | 31  | dMMR | + | - |  | WT | WT |
| GSM972306 | CMS2         | primary | Male   | 70 | II  | T3  | N0 | M0 | Left  | Y | 5FU    | 0 | 56  | 0 | 56  | pMMR | - | + |  | M  | WT |
| GSM972307 | CMS2         | primary | Female | 71 | II  | T3  | N0 | M0 | Right | Y | FUFOL  | 0 | 82  | 0 | 82  | pMMR | - | + |  | WT | WT |
| GSM972308 | CMS1         | primary | Female | 79 | III | T3  | N1 | M0 | Right | N |        | 0 | 92  | 0 | 92  | pMMR | + | + |  | WT | WT |
| GSM972309 | CMS2         | primary | Male   | 78 | II  | T3  | N0 | M0 | Right | Y | FUFOL  | 0 | 95  | 0 | 95  | pMMR | - | + |  | WT | WT |
| GSM972310 | Undetermined | primary | Female | 80 | III | T3  | N1 | M0 | Right | N |        | 0 | 25  | 0 | 25  | pMMR | - | + |  | M  | M  |
| GSM972311 | CMS4         | primary | Male   | 55 | II  | T3  | N0 | M0 | Left  | Y | 5FU    | 0 | 106 | 0 | 106 | pMMR | + | + |  | WT | WT |
| GSM972312 | CMS2         | primary | Male   | 71 | II  | T3  | N0 | M0 | Left  | N |        | 0 | 97  | 1 | 97  | pMMR | - | + |  | M  | WT |
| GSM972313 | CMS2         | primary | Female | 83 | I   | T2  | N0 | M0 | Left  | N |        | 0 | 91  | 1 | 91  | pMMR | - | + |  | M  | WT |
| GSM972314 | CMS1         | primary | Female | 86 | III | T3  | N1 | M0 | Right | N |        | 0 | 46  | 0 | 46  | dMMR | + | - |  | WT | WT |
| GSM972315 | CMS3         | primary | Female | 60 | I   | T1  | N0 | M0 | Left  | N |        | 0 | 84  | 0 | 84  | pMMR | - | + |  | WT | M  |
| GSM972316 | CMS1         | primary | Female | 77 | II  | T3  | N0 | M0 | Right | N |        | 0 | 83  | 0 | 83  | dMMR | + | + |  | WT | WT |
| GSM972317 | CMS1         | primary | Male   | 85 | II  | T3  | N0 | M0 | Right | N |        | 1 | 5   | 1 | 30  | dMMR | + | + |  | WT | WT |

|           |              |         |        |    |     |    |    |    |       |   |       |   |     |   |     |      |   |   |    |    |    |
|-----------|--------------|---------|--------|----|-----|----|----|----|-------|---|-------|---|-----|---|-----|------|---|---|----|----|----|
| GSM972318 | CMS2         | primary | Female | 84 | II  | T3 | N0 | M0 | Right | N |       | 0 | 36  | 1 | 36  | pMMR | - | + | WT | M  | WT |
| GSM972319 | CMS2         | primary | Female | 71 | II  | T3 | N0 | M0 | Left  | Y | FUFOL | 0 | 78  | 1 | 78  | pMMR | - | + | M  | M  | WT |
| GSM972320 | CMS2         | primary | Male   | 64 | III | T2 | N1 | M0 | Left  | N |       | 1 | 10  | 1 | 58  | pMMR | - | + | M  | M  | WT |
| GSM972321 | CMS2         | primary | Male   | 52 | III | T3 | N2 | M0 | Left  | N |       | 0 | 9   | 0 | 9   | pMMR | - | + | M  | WT | WT |
| GSM972322 | CMS2         | primary | Male   | 46 | II  | T3 | N0 | M0 | Left  | Y | FUFOL | 1 | 66  | 1 | 86  | pMMR | - | + | WT | M  | WT |
| GSM972323 | CMS2         | primary | Female | 67 | III | T3 | N1 | M0 | Left  | Y | 5FU   | 0 | 80  | 0 | 80  | pMMR | - | + | M  | WT | WT |
| GSM972324 | CMS2         | primary | Male   | 72 | II  | T3 | N0 | M0 | Left  | N |       | 0 | 82  | 0 | 82  | pMMR | - | + | WT | M  | WT |
| GSM972325 | CMS1         | primary | Male   | 55 | III | T3 | N1 | M0 | Right | N |       | 1 | 53  | 0 | 71  | pMMR | + |   | WT | M  | WT |
| GSM972326 | CMS3         | primary | Female | 71 | II  | T3 | N0 | M0 | Left  | Y | FUFOL | 0 | 85  | 0 | 85  | pMMR | - | + | M  | M  | WT |
| GSM972327 | CMS3         | primary | Male   | 60 | II  | T3 | N0 | M0 | Right | N |       | 0 | 83  | 0 | 83  | pMMR | - | + | WT | WT | WT |
| GSM972328 | CMS2         | primary | Male   | 74 | III | T3 | N2 | M0 | Left  | Y | FUFOL | 1 | 78  | 0 | 82  | pMMR | - | + | WT | WT | WT |
| GSM972329 | Undetermined | primary | Male   | 61 | II  | T3 | N0 | M0 | Left  | N |       | 0 | 78  | 0 | 78  | pMMR | - | + | WT | WT | WT |
| GSM972330 | CMS1         | primary | Female | 79 | II  | T3 | N0 | M0 | Right | N |       | 0 | 86  | 0 | 86  | dMMR | - | - | WT | M  | WT |
| GSM972331 | CMS2         | primary | Male   | 79 | II  | T3 | N0 | M0 | Left  | N |       | 0 | 75  | 1 | 75  | pMMR | - | + | WT | WT | WT |
| GSM972332 | CMS1         | primary | Female | 72 | II  | T3 | N0 | M0 | Left  | N |       | 0 | 87  | 0 | 87  | dMMR | + | - | M  | WT | M  |
| GSM972333 | CMS2         | primary | Male   | 49 | II  | T3 | N0 | M0 | Left  | Y | FUFOL | 0 | 80  | 0 | 80  | pMMR | - | + | M  | WT | WT |
| GSM972334 | CMS1         | primary | Female | 79 | III | T3 | N2 | M0 | Right | Y | 5FU   | 0 | 77  | 0 | 77  | dMMR | + | + | WT | WT | M  |
| GSM972335 | CMS2         | primary | Male   | 73 | I   | T2 | N0 | M0 | Left  | N |       | 0 | 46  | 1 | 46  | pMMR | - | + | M  | WT | WT |
| GSM972336 | CMS2         | primary | Male   | 63 | III | T3 | N1 | M0 | Left  | Y | 5FU   | 0 | 50  | 0 | 50  | pMMR | - | + | M  | WT | WT |
| GSM972337 | CMS1         | primary | Female | 80 | III | T3 | N1 | M0 | Right | N |       | 0 | 41  | 1 | 41  | dMMR | + | - | WT | WT | M  |
| GSM972338 | CMS2         | primary | Male   | 69 | II  | T3 | N0 | M0 | Left  | Y | FUFOL | 0 | 74  | 0 | 74  | pMMR | - | + | M  | WT | WT |
| GSM972339 | CMS2         | primary | Male   | 67 | III | T3 | N1 | M0 | Right | Y | 5FU   | 0 | 76  | 0 | 76  | pMMR | - | + | M  | M  | WT |
| GSM972340 | CMS2         | primary | Male   | 75 | II  | T3 | N0 | M0 | Left  | N |       | 1 | 48  | 0 | 84  | pMMR | - | + | WT | WT | WT |
| GSM972341 | CMS2         | primary | Female | 89 | III | T3 | N1 | M0 | Left  | N |       | 0 | 69  | 0 | 69  | pMMR | - | + | M  | WT | WT |
| GSM972342 | CMS2         | primary | Male   | 78 | I   | T2 | N0 | M0 | Left  | N |       | 0 | 28  | 0 | 28  | pMMR | - | + | WT | WT | WT |
| GSM972343 | CMS2         | primary | Male   | 86 | II  | T3 | N0 | M0 | Right | N |       | 0 | 52  | 1 | 52  | pMMR | - | + | M  | M  | WT |
| GSM972344 | CMS2         | primary | Female | 70 | II  | T3 | N0 | M0 | Left  | N |       | 0 | 75  | 0 | 75  | pMMR | - | + | M  | WT | WT |
| GSM972345 | CMS4         | primary | Male   | 83 | III | T3 | N2 | M0 | Right | N |       | 1 | 41  | 1 | 42  | pMMR | - | + | WT | M  | WT |
| GSM972346 | CMS1         | primary | Female | 82 | III | T3 | N1 | M0 | Left  | N |       | 0 | 72  | 1 | 72  | dMMR | + | - | M  | WT | M  |
| GSM972347 | CMS2         | primary | Female | 73 | II  | T3 | N0 | M0 | Left  | N |       | 0 | 7   | 0 | 7   | pMMR | - | + | M  | WT | WT |
| GSM972348 | CMS2         | primary | Male   | 60 | II  | T3 | N0 | M0 | Left  | Y | FUFOL | 0 | 62  | 0 | 62  | pMMR | - |   | WT | M  | WT |
| GSM972349 | CMS4         | primary | Female | 79 | III | T4 | N1 | M0 | Right | Y | FUFOL | 0 | 5   | 1 | 5   | pMMR | - | - | WT | M  | WT |
| GSM972350 | CMS3         | primary | Female | 84 | III | T3 | N1 | M0 | Left  | N |       |   | 9   | 1 | 9   | pMMR | - | - | WT | WT | WT |
| GSM972351 | CMS2         | primary | Male   | 71 | II  | T4 | N0 | M0 | Left  | N |       | 0 | 24  | 0 | 24  |      | - | + |    | WT | WT |
| GSM972352 | CMS4         | primary | Male   | 66 | III | T3 | N2 | M0 | Left  | Y | FUFOL | 1 | 74  | 0 | 139 | pMMR | - | + | M  | WT | WT |
| GSM972353 | CMS1         | primary | Female | 46 | II  | T4 | N0 | M0 | Right | Y | FUFOL | 0 | 133 | 0 | 133 | dMMR | - | - | WT | M  | WT |
| GSM972354 | Undetermined | primary | Female | 68 | III | T3 | N2 | M0 | Right | N |       | 1 | 23  | 1 | 95  | pMMR | - | + | M  | WT | WT |
| GSM972355 | Undetermined | primary | Male   | 72 | II  | T3 | N0 | M0 | Left  | Y | FUFOL | 1 | 17  | 1 | 34  | pMMR | - | + | M  | M  | WT |
| GSM972356 | CMS2         | primary | Female | 73 | II  | T3 | N0 | M0 | Left  | N |       |   | 53  | 1 | 53  | pMMR | - | + | M  | WT | WT |
| GSM972357 | CMS3         | primary | Female | 88 | II  | T3 | N0 | M0 | Left  | N |       | 0 | 42  | 1 | 42  | pMMR | - | - | WT | WT | WT |
| GSM972358 | CMS2         | primary | Female | 53 | II  | T3 | N0 | M0 | Left  | Y | FUFOL | 0 | 81  | 0 | 81  | pMMR | - | + | M  | WT | WT |

|           |              |         |        |    |     |    |    |    |       |   |        |   |     |   |     |      |   |   |    |    |    |
|-----------|--------------|---------|--------|----|-----|----|----|----|-------|---|--------|---|-----|---|-----|------|---|---|----|----|----|
| GSM972359 | CMS4         | primary | Female | 56 | II  | T3 | N0 | M0 | Right | Y | FUFOL  | 1 | 12  | 1 | 30  | pMMR | - | - | WT | WT | WT |
| GSM972360 | Undetermined | primary | Female | 54 | III | T3 | N1 | M0 | Left  | Y | FUFOL  | 0 | 141 | 0 | 141 | pMMR | - | + | M  | WT | WT |
| GSM972361 | Undetermined | primary | Female | 72 | III | T4 | N2 | M0 | Left  | Y | 5FU    | 1 | 18  | 1 | 19  | pMMR | + | + | M  | M  | WT |
| GSM972362 | CMS2         | primary | Male   | 50 | III | T3 | N1 | M0 | Right | Y | 5FU    | 0 | 98  | 0 | 98  | pMMR | - | + | M  | M  | WT |
| GSM972363 | CMS2         | primary | Female | 68 | III | T3 | N1 | M0 | Left  | Y | FUFOL  | 0 | 140 | 0 | 140 | pMMR | - | + | M  | M  | WT |
| GSM972364 | CMS3         | primary | Female | 71 | III | T3 | N1 | M0 | Right | Y | FUFOL  | 0 | 103 | 0 | 103 | pMMR | + | + | M  | M  | WT |
| GSM972365 | CMS1         | primary | Female | 59 | III | T3 | N2 | M0 | Right | Y | FUFOL  | 0 | 47  | 0 | 47  | pMMR | + | + | M  | M  | WT |
| GSM972366 | Undetermined | primary | Male   | 50 | III | T3 | N2 | M0 | Right | Y | FOLFO  | 1 | 14  | 1 | 24  | pMMR | - | + | WT | M  | WT |
| GSM972367 | CMS4         | primary | Male   | 72 | III | T3 | N1 | M0 | Left  | Y | FUFOL  | 0 | 95  | 0 | 95  | pMMR | - | + | M  | M  | WT |
| GSM972368 | CMS2         | primary | Female | 70 | III | T3 | N1 | M0 | Left  | Y | FUFOL  | 0 | 92  | 0 | 92  | pMMR | - | + | M  | WT | WT |
| GSM972369 | CMS4         | primary | Male   | 58 | III | T3 | N2 | M0 | Left  | Y | FUFOL  | 1 | 18  | 1 | 102 | pMMR | - | + | M  | WT | WT |
| GSM972370 | CMS2         | primary | Female | 73 | III | T3 | N1 | M0 | Left  | Y | FUFOL  | 1 | 32  | 1 | 71  | pMMR | - | + | M  | WT | WT |
| GSM972371 | CMS2         | primary | Male   | 47 | III | T3 | N1 | M0 | Right | Y | FOLFIR | 0 | 81  | 0 | 81  | pMMR | - | + | M  | WT | WT |
| GSM972372 | CMS2         | primary | Male   | 59 | III | T4 | N2 | M0 | Right | Y | 5FU    | 1 | 33  | 1 | 50  | pMMR | - | + | M  | M  | WT |
| GSM972373 | CMS2         | primary | Male   | 66 | III | T3 | N1 | M0 | Right | Y | FUFOL  | 1 | 37  | 0 | 79  | pMMR | - | + | M  | WT | WT |
| GSM972374 | CMS2         | primary | Male   | 65 | III | T1 | N1 | M0 | Left  | Y | FUFOL  | 0 | 90  | 0 | 90  | pMMR | - | + | WT | WT | WT |
| GSM972375 | CMS4         | primary | Female | 46 | III | T3 | N1 | M0 | Right | Y | FUFOL  | 0 | 117 | 0 | 117 | pMMR | + | + | WT | M  | WT |
| GSM972376 | CMS2         | primary | Female | 73 | III | T3 | N2 | M0 | Left  | Y | 5FU    | 0 | 87  | 0 | 87  | pMMR | - | + | M  | WT | WT |
| GSM972377 | CMS4         | primary | Female | 59 | III | T3 | N1 | M0 | Left  | Y | 5FU    | 0 | 82  | 0 | 82  | pMMR | - | + | WT | WT | WT |
| GSM972378 | CMS2         | primary | Male   | 78 | III | T3 | N2 | M0 | Right | Y | FUFOL  | 0 | 86  | 0 | 86  | pMMR | - | + | WT | WT | WT |
| GSM972379 | CMS3         | primary | Female | 63 | III | T2 | N1 | M0 | Left  | Y | FUFOL  | 0 | 95  | 0 | 95  | pMMR | - | + | M  | M  | WT |
| GSM972380 | CMS4         | primary | Female | 64 | III | T3 | N2 | M0 | Right | Y | 5FU    | 1 | 6   | 1 | 15  | pMMR | - | + | M  | M  | WT |
| GSM972381 | CMS2         | primary | Male   | 63 | II  | T3 | N0 | M0 | Left  | Y | FUFOL  | 1 | 27  | 1 | 48  | pMMR | - | + | M  | WT | WT |
| GSM972382 | CMS2         | primary | Male   | 58 | II  | T3 | N0 | M0 | Right | N |        | 1 | 37  | 1 | 38  | pMMR | - | + | M  | M  | WT |
| GSM972383 | CMS2         | primary | Female | 70 | II  | T3 | N0 | M0 | Left  | N |        | 0 | 92  | 0 | 92  | pMMR | - | + | M  | WT | WT |
| GSM972384 | Undetermined | primary | Male   | 61 | II  | T3 | N0 | M0 | Left  | N |        | 0 | 106 | 1 | 106 | pMMR | - | + | M  | WT | WT |
| GSM972385 | CMS4         | primary | Male   | 70 | II  | T3 | N0 | M0 | Left  | N |        | 0 | 63  | 0 | 63  | pMMR | - | + | M  | WT | WT |
| GSM972386 | CMS2         | primary | Female | 77 | II  | T3 | N0 | M0 | Right | N |        | 0 | 90  | 0 | 90  | pMMR | - | + | M  | M  | WT |
| GSM972387 | CMS2         | primary | Male   | 62 | II  | T3 | N0 | M0 | Left  | N |        | 1 | 24  | 0 | 123 | pMMR | - | + | M  | WT | WT |
| GSM972388 | CMS2         | primary | Female | 75 | II  | T3 | N0 | M0 | Left  | N |        | 0 | 83  | 1 | 83  | pMMR | - | + | M  | WT | WT |
| GSM972389 | CMS3         | primary | Male   | 77 | II  | T4 | N0 | M0 | Right | N |        | 0 | 93  | 0 | 93  | pMMR | - | + | WT | M  | WT |
| GSM972390 | Undetermined | primary | Male   | 87 | III | T3 | N1 | M0 | Right | N |        | 1 | 6   | 1 | 8   | dMMR | - | - | M  | M  | WT |
| GSM972391 | CMS1         | primary | Male   | 68 | II  | T3 | N0 | M0 | Right | N |        | 1 | 43  | 1 | 52  | dMMR | + | - | WT | WT | M  |
| GSM972392 | CMS2         | primary | Female | 75 | II  | T4 | N0 | M0 | Right | N |        | 1 | 21  | 1 | 44  | pMMR | - | + | WT | M  | WT |
| GSM972393 | CMS2         | primary | Male   | 76 | II  | T3 | N0 | M0 | Right | N |        | 1 | 5   | 1 | 47  | pMMR | - | + | WT | M  | WT |
| GSM972394 | Undetermined | primary | Male   | 81 | III | T3 | N1 | M0 | Left  | N |        | 1 | 6   | 1 | 11  | pMMR | - | + | M  | M  | WT |
| GSM972395 | CMS2         | primary | Male   | 64 | III | T4 | N1 | M0 | Left  | Y | FUFOL  | 0 | 147 | 0 | 147 | pMMR | - | + | M  | WT | WT |
| GSM972396 | CMS3         | primary | Male   | 72 | II  | T3 | N0 | M0 | Right | N |        | 0 | 107 | 0 | 107 | pMMR | - | + | WT | WT | WT |
| GSM972397 | CMS2         | primary | Female | 83 | II  | T3 | N0 | M0 | Left  | N |        | 0 | 105 | 0 | 105 | pMMR | - | + | M  | M  | WT |
| GSM972398 | CMS2         | primary | Male   | 65 | II  | T3 | N0 | M0 | Left  | N |        | 0 | 64  | 1 | 64  | pMMR | - | + | M  | WT | WT |
| GSM972399 | CMS2         | primary | Female | 54 | III | T4 | N1 | M0 | Left  | N |        | 0 | 90  | 0 | 90  | pMMR |   | + | M  | WT | WT |

|           |              |         |        |    |     |    |    |    |       |   |        |   |     |   |     |      |   |   |   |    |    |
|-----------|--------------|---------|--------|----|-----|----|----|----|-------|---|--------|---|-----|---|-----|------|---|---|---|----|----|
| GSM972400 | Undetermined | primary | Female | 68 | IV  | T4 | N2 | M1 | Left  | Y |        | 1 | 8   | 1 | 11  | pMMR | - | + | M | M  | WT |
| GSM972401 | Undetermined | primary | Male   | 69 | II  | T3 | N0 | M0 | Right | N |        | 0 | 0   | 1 | 0   | pMMR | + | - |   | M  | WT |
| GSM972402 | CMS4         | primary | Male   | 71 | II  | T3 | N0 | M1 | Right | Y | FOLFIR | 1 | 0   | 1 | 31  |      | - | + |   | M  | WT |
| GSM972403 | CMS1         | primary | Female | 70 | II  | T3 | N0 | M0 | Right | N |        | 0 | 56  | 0 | 56  |      | - | - |   | M  | WT |
| GSM972404 | CMS2         | primary | Male   | 68 | II  | T3 | N0 | M0 | Left  | N |        | 0 | 48  | 0 | 48  |      | - | + |   | WT | WT |
| GSM972405 | CMS2         | primary | Female | 70 | II  | T4 | N0 | M0 | Left  | N |        | 0 | 79  | 1 | 79  |      | - | + |   | WT | WT |
| GSM972406 | CMS1         | primary | Female | 66 | II  | T3 | N0 | M0 | Left  | N |        | 0 | 106 | 0 | 106 |      | - | + |   | WT | WT |
| GSM972407 | CMS2         | primary | Female | 42 | II  | T4 | N0 | M0 | Left  | Y | FUFOL  | 0 | 132 | 0 | 132 |      | - | + |   | WT | WT |
| GSM972408 | Undetermined | primary | Male   | 66 | II  | T3 | N0 | M0 | Left  | Y | FUFOL  | 0 | 32  | 1 | 32  |      | - | + |   | WT | WT |
| GSM972409 | CMS4         | primary | Female | 72 | II  | T4 | N0 | M0 | Left  | N |        | 0 | 104 | 0 | 104 |      | - | + |   | WT | WT |
| GSM972410 | CMS4         | primary | Female | 68 | II  | T3 | N0 | M0 | Left  | N |        | 0 | 91  | 0 | 91  |      | - | + |   | WT | WT |
| GSM972411 | CMS2         | primary | Female | 48 | III | T1 | N1 | M0 | Left  | Y |        | 0 | 125 | 0 | 125 | pMMR |   |   | M | M  |    |
| GSM972412 | Undetermined | primary | Male   | 78 | III | T3 | N2 | M0 | Right | Y |        | 1 | 5   | 1 | 8   | pMMR |   |   | M | WT |    |
| GSM972413 | CMS4         | primary | Male   | 66 | III | T3 | N1 | M0 | Left  | Y |        | 1 | 16  | 1 | 20  | pMMR |   |   | M | WT | WT |
| GSM972414 | CMS2         | primary | Female | 52 | II  | T3 | N0 | M0 | Left  | N |        | 0 | 53  | 0 | 53  | pMMR | - | + |   | WT | WT |
| GSM972415 | CMS2         | primary | Male   | 69 | III | T3 | N1 | M0 | Left  | Y |        | 1 | 8   | 1 | 42  | pMMR |   |   | M | M  |    |
| GSM972416 | Undetermined | primary | Male   | 49 | II  | T4 | N0 | M0 | Left  | Y |        | 1 | 5   | 1 | 8   | pMMR | - | + | M | M  | WT |
| GSM972417 | CMS2         | primary | Male   | 59 | II  | T3 | N0 | M0 | Left  | Y |        | 0 | 146 | 0 | 146 | pMMR | - | + |   | WT | WT |
| GSM972418 | CMS2         | primary | Male   | 64 | II  | T3 | N0 | M0 | Left  | N |        | 0 | 70  | 0 | 70  | pMMR | - | - | M | WT | WT |
| GSM972419 | CMS4         | primary | Female | 85 | III | T3 | N2 | M0 | Left  | N |        | 1 | 30  | 1 | 32  | pMMR | - | + | M | WT | WT |
| GSM972420 | CMS1         | primary | Male   | 83 | III | T3 | N2 | M0 | Right | N |        | 1 | 6   | 1 | 6   | pMMR | + | - |   | WT | WT |
| GSM972421 | CMS4         | primary | Male   | 66 | III |    |    |    | Left  | N |        | 1 | 22  | 0 | 28  | pMMR | - | + | M | WT | WT |
| GSM972422 | CMS4         | primary | Male   | 74 | II  |    |    |    | Right | N |        | 1 | 13  | 1 | 37  | pMMR | - | + |   | WT | M  |
| GSM972423 | CMS2         | primary | Female | 52 | II  |    |    |    | Left  | Y |        | 1 | 13  | 0 | 40  | pMMR | - |   |   | M  | WT |
| GSM972424 | CMS2         | primary | Male   | 70 | II  | T3 | N0 | M0 | Left  | Y | 5FU    | 0 | 104 | 0 | 104 | pMMR | - | + |   | M  | WT |
| GSM972425 | Undetermined | primary | Female | 72 | III | T3 | N1 | M0 | Right | Y |        | 0 | 59  | 0 | 59  | pMMR | - |   |   | WT | M  |
| GSM972426 | Undetermined | primary | Male   | 49 | II  | T3 | N0 | M0 | Right | Y |        | 0 | 81  | 0 | 81  | pMMR | - | + | M | WT | WT |
| GSM972427 | CMS2         | primary | Male   | 63 | II  | T3 | N0 | M0 | Left  | N |        | 0 | 53  | 0 | 53  | pMMR | - | + | M | WT | WT |
| GSM972428 | CMS4         | primary | Male   | 62 | III | T3 | N2 | M0 | Left  | Y |        | 0 | 55  | 0 | 55  | pMMR | - | + | M | WT | WT |
| GSM972429 | CMS3         | primary | Male   | 64 | III | T4 | N2 | M0 | Left  | Y |        | 0 | 62  | 0 | 62  | pMMR | - | + | M | M  | WT |
| GSM972430 | CMS1         | primary | Female | 43 | II  | T3 | N0 | M0 | Right | Y |        | 0 | 53  | 0 | 53  | pMMR | + | - |   | WT | WT |
| GSM972431 | CMS2         | primary | Male   | 59 | III | T3 | N1 | M0 | Right | Y |        | 0 | 54  | 0 | 54  | pMMR | - | + |   | WT | M  |
| GSM972432 | Undetermined | primary | Male   | 71 | III |    |    |    | Left  | Y |        | 1 | 19  | 0 | 55  | pMMR | - | + |   | M  | M  |
| GSM972433 | CMS4         | primary | Male   | 85 | III |    |    |    | Left  | N |        | 1 | 3   | 1 | 16  | pMMR |   |   |   | WT | WT |
| GSM972434 | CMS2         | primary | Male   | 70 | II  |    |    |    | Left  | N |        | 1 | 19  | 1 | 42  | pMMR |   |   |   | M  | WT |
| GSM972435 | CMS2         | primary | Male   | 71 | III |    |    |    | Left  | Y |        | 1 | 14  | 0 | 40  | pMMR | - | + |   | M  | WT |
| GSM972436 | CMS2         | primary | Male   | 81 | II  |    |    |    | Left  | N |        | 1 | 2   | 1 | 18  | pMMR | - | + |   | M  | M  |
| GSM972437 | CMS4         | primary | Female | 48 | IV  | T3 | N2 | M1 | Left  |   |        | 1 | 0   | 1 | 7   | pMMR | - | + |   | WT | WT |
| GSM972438 | CMS4         | primary | Male   | 44 | IV  | T4 | N1 | M1 | Right |   |        | 1 | 0   | 1 | 30  | pMMR |   | + |   | M  | WT |
| GSM972439 | CMS2         | primary | Male   | 65 | IV  | T3 | N1 | M1 | Left  |   |        | 1 | 0   | 1 | 2   | pMMR | - |   |   | M  | WT |
| GSM972440 | Undetermined | primary | Male   | 50 | II  | T3 | N0 | M0 | Left  | Y |        | 0 | 52  | 0 | 52  | pMMR | - |   |   | M  | M  |



|           |              |         |        |    |     |    |    |    |       |   |         |    |     |     |      |      |   |    |    |    |    |
|-----------|--------------|---------|--------|----|-----|----|----|----|-------|---|---------|----|-----|-----|------|------|---|----|----|----|----|
| GSM972441 | CMS4         | primary | Female | 49 | IV  | T4 | N2 | M1 | Left  |   | 1       | 0  | 0   | 68  | pMMR | -    | + | WT | WT | WT |    |
| GSM972442 | CMS2         | primary | Female | 54 | IV  | T3 | N2 | M1 | Left  |   | 1       | 0  | 1   | 6   | pMMR | -    |   | WT | M  | WT |    |
| GSM972443 | Undetermined | primary | Male   | 49 | II  | T3 | N0 | M0 | Left  | N | 0       | 48 | 0   | 48  | dMMR | +    | - | WT | WT |    |    |
| GSM972444 | CMS1         | primary | Male   | 73 | III | T4 | N2 | MX | Right | Y | 5FU     | 1  | 5   | 1   | 14   | dMMR | - | -  | M  | WT |    |
| GSM972445 | CMS1         | primary | Male   | 48 | II  | T4 | N0 | M0 | Right | N |         | 0  | 35  | 0   | 35   | dMMR | - | -  | WT | WT |    |
| GSM972446 | Undetermined | primary | Male   | 67 | III | T3 | N1 | MX | Right |   |         |    |     |     | dMMR | -    | - | M  | WT |    |    |
| GSM972447 | CMS1         | primary | Male   | 71 | II  | T3 | N0 | M0 | Right | N |         | 0  | 31  | 0   | 31   | dMMR | + | -  | WT | M  |    |
| GSM972448 | CMS1         | primary | Female | 74 | II  | T3 | N0 | M0 | Right | N |         |    |     |     | dMMR | +    | + | WT | WT | M  |    |
| GSM972449 | Undetermined | primary | Female | 51 | III | T4 | N1 | M0 | Right | Y | FOLFO)1 | 1  | 19  | 1   | 41   | pMMR | - | +  | M  | M  | WT |
| GSM972450 | CMS2         | primary | Male   | 80 | II  | T3 | N0 | M0 | Left  | N |         | 1  | 19  | 1   | 47   | pMMR | - | +  | M  | WT | WT |
| GSM972451 | CMS2         | primary | Male   | 58 | II  | T4 | N0 | M0 | Left  | N |         | 0  | 97  | 0   | 97   | pMMR | - | -  | WT | WT | WT |
| GSM972452 | CMS1         | primary | Female | 75 | III | T3 | N2 | M0 | Right | Y | FUFOL   | 0  | 99  | 0   | 99   | pMMR | + | -  | WT | WT | M  |
| GSM972453 | CMS3         | primary | Female | 51 | III | T3 | N1 | M0 | Right | Y | FUFOL   | 0  | 100 | 0   | 100  | pMMR | - | -  | WT | M  | WT |
| GSM972454 | CMS2         | primary | Male   | 62 | I   | T2 | N0 | M0 | Left  | N |         | 0  | 75  | 0   | 75   | pMMR | - | +  | M  | M  | WT |
| GSM972455 | CMS1         | primary | Female | 89 | III | T3 | N1 | M0 | Right | N |         | 0  | 74  | 0   | 74   | dMMR | + | +  | WT | WT | M  |
| GSM972456 | CMS2         | primary | Female | 82 | II  | T3 | N0 | M0 | Left  | N |         | 0  | 0   | 1   | 0    | pMMR | - | +  | M  | WT | WT |
| GSM972457 | CMS3         | primary | Female | 74 | III | T3 | N1 | M0 | Left  | Y | 5FU     | 1  | 34  | 0   | 68   | pMMR | - | +  | WT | M  | WT |
| GSM972458 | CMS1         | primary | Male   | 65 | II  | T3 | N0 | M0 | Right | N |         | 0  | 17  | 1   | 17   | dMMR | + | -  | WT | M  | WT |
| GSM972459 | CMS3         | primary | Male   | 80 | II  | T3 | N0 | M0 | Right | N |         | 0  | 12  | 0   | 12   | pMMR | - | -  | WT | WT | WT |
| GSM972460 | Undetermined | primary | Female | 70 | II  | T3 | N0 | M0 | Left  | Y | FUFOL   | 0  | 96  | 0   | 96   | pMMR | + | +  | WT | WT | WT |
| GSM972461 | CMS2         | primary | Male   | 56 | II  | T3 | N0 | M0 | Left  | N |         | 0  | 96  | 0   | 96   | pMMR | - | +  | M  | WT | WT |
| GSM972462 | CMS2         | primary | Male   | 72 | I   | T2 | N0 | M0 | Left  | N |         | 0  | 88  | 0   | 88   | pMMR | - | +  | M  | M  | WT |
| GSM972463 | CMS3         | primary | Male   | 67 | III | T4 | N2 | M0 | Right | N |         |    |     | 1   | 2    | pMMR | - | -  | WT | M  | WT |
| GSM972464 | CMS4         | primary | Female | 76 | I   | T2 | N0 | M0 | Left  | N |         | 0  | 86  | 0   | 86   | pMMR | - | +  | M  | WT | WT |
| GSM972465 | CMS1         | primary | Male   | 73 | II  | T3 | N0 | M0 | Right | N |         | 0  | 84  | 1   | 84   | pMMR | - | +  | WT | WT |    |
| GSM972466 | CMS2         | primary | Female | 73 | III | T3 | N1 | M0 | Right | Y | 5FU     | 0  | 75  | 0   | 75   | pMMR | - | +  | M  | M  | WT |
| GSM972467 | CMS4         | primary | Male   | 54 | III | T3 | N2 | M0 | Left  | Y | FOLFIR  | 0  | 72  | 0   | 72   | pMMR | - | +  | M  | M  | WT |
| GSM972468 | CMS2         | primary | Male   | 73 | II  | T3 | N0 | M0 | Left  | N |         | 0  | 24  | 1   | 24   | pMMR | - | +  | M  | WT | WT |
| GSM972469 | CMS2         | primary | Male   | 69 | I   | T2 | N0 | M0 | Left  | N |         | 0  | 86  | 0   | 86   | pMMR | - | +  | WT | M  | WT |
| GSM972470 | CMS1         | primary | Male   | 50 | II  | T3 | N0 | M0 | Right | Y | 5FU     | 0  | 85  | 0   | 85   | dMMR | - | -  | M  | WT | WT |
| GSM972471 | CMS1         | primary | Female | 73 | I   | T2 | N0 | M0 | Right | N |         |    |     |     | dMMR | +    | - | WT | WT | M  |    |
| GSM972472 | CMS3         | primary | Male   | 58 | II  | T4 | N0 | M0 | Right | Y | 5FU     | 0  | 80  | 0   | 80   | pMMR | + | +  | WT | WT | WT |
| GSM972473 | Undetermined | primary | Male   | 67 | II  | T3 | N0 | M0 | Left  | N |         | 1  | 45  | 0   | 117  | pMMR | - | -  | WT | M  | WT |
| GSM972474 | Undetermined | primary | Female | 49 | III | T3 | N1 | M0 | Left  | Y | FOLFO)1 | 9  | 0   | 119 | pMMR | -    | + | M  | WT | WT |    |
| GSM972475 | CMS3         | primary | Female | 68 | II  | T3 | N0 | M0 | Left  | N |         | 0  | 87  | 0   | 87   | pMMR | - | +  | WT | M  | WT |
| GSM972476 | CMS4         | primary | Male   | 61 | III | T4 | N1 | M0 | Left  | Y | 5FU     | 0  | 64  | 0   | 64   | pMMR | - | +  | WT | WT | WT |
| GSM972477 | CMS2         | primary | Male   | 75 | II  | T3 | N0 | M0 | Right | N |         | 0  | 81  | 0   | 81   | pMMR | - | +  | M  | M  | WT |
| GSM972478 | CMS2         | primary | Male   | 80 | II  | T3 | N0 | M0 | Left  | N |         | 0  | 69  | 0   | 69   | pMMR | - | +  | M  | WT | WT |
| GSM972479 | CMS4         | primary | Male   | 79 | III | T4 | N2 | M0 | Right | N |         | 0  | 3   | 0   | 3    | pMMR | - | +  | WT | M  | WT |
| GSM972480 | CMS3         | primary | Male   | 78 | II  | T3 | N0 | M0 | Right | N |         | 0  | 69  | 0   | 69   | pMMR | - | -  | WT | M  | WT |
| GSM972481 | CMS4         | primary | Male   | 67 | III | T3 | N2 | M0 | Left  | Y | 5FU     | 0  | 65  | 1   | 65   | pMMR | - | +  | M  | WT | WT |

|           |              |         |        |    |     |    |    |    |       |   |       |   |     |   |     |      |   |   |    |    |    |
|-----------|--------------|---------|--------|----|-----|----|----|----|-------|---|-------|---|-----|---|-----|------|---|---|----|----|----|
| GSM972482 | Undetermined | primary | Female | 90 | II  | T3 | N0 | M0 | Right | N |       | 0 | 42  | 0 | 42  | pMMR | - | - | WT | M  | WT |
| GSM972483 | CMS2         | primary | Female | 80 | II  | T3 | N0 | M0 | Left  | N |       | 1 | 23  | 1 | 28  | pMMR | - | + | M  | WT | WT |
| GSM972484 | Undetermined | primary | Male   | 68 | II  | T3 | N0 | M0 | Left  | Y | 5FU   | 0 | 76  | 0 | 76  | pMMR | - | + | WT | WT | WT |
| GSM972485 | CMS2         | primary | Male   | 69 | II  | T3 | N0 | M0 | Right | N |       | 0 | 75  | 0 | 75  | pMMR | - | + | WT | M  | WT |
| GSM972486 | Undetermined | primary | Male   | 87 | II  | T3 | N0 | M0 | Right | N |       | 0 | 33  | 0 | 33  | dMMR | - | + | WT |    | WT |
| GSM972487 | CMS3         | primary | Male   | 84 | II  | T3 | N0 | M0 | Left  | N |       | 0 | 67  | 0 | 67  |      | - | - | WT | M  | WT |
| GSM972488 | CMS3         | primary | Male   | 65 | II  | T3 | N0 | M0 | Right | N |       | 0 | 49  | 0 | 49  | pMMR | + | - | WT | M  | WT |
| GSM972489 | CMS3         | primary | Female | 77 | II  | T3 | N0 | M0 | Right | N |       | 0 | 74  | 0 | 74  | pMMR | - | - | WT | M  | WT |
| GSM972490 | CMS2         | primary | Male   | 67 | II  | T3 | N0 | M0 | Left  | N |       | 0 | 74  | 0 | 74  | pMMR | - | + | M  | WT | WT |
| GSM972491 | CMS2         | primary | Male   | 74 | II  | T3 | N0 | M0 | Left  | N |       | 0 | 70  | 0 | 70  | pMMR | - | + | M  | WT | WT |
| GSM972492 | CMS2         | primary | Male   | 69 | I   | T2 | N0 | M0 | Right | N |       | 0 | 68  | 0 | 68  | pMMR | + | + | M  | WT | WT |
| GSM972493 | Undetermined | primary | Female | 89 | II  | T3 | N0 | M0 | Right | N |       | 0 | 59  | 0 | 59  | pMMR | - | + | WT | M  | WT |
| GSM972494 | Undetermined | primary | Female | 43 | I   | T2 | N0 | M0 | Left  | N |       | 0 | 57  | 0 | 57  | dMMR | - | + | WT | WT | WT |
| GSM972495 | CMS2         | primary | Female | 69 | III | T3 | N1 | M0 | Right | Y | FUFOL | 1 | 18  | 1 | 27  | pMMR | - | + | WT | WT | WT |
| GSM972496 | Undetermined | primary | Female | 65 | I   | T2 | N0 | M0 | Left  | N |       | 0 | 142 | 0 | 142 | pMMR | - | + | WT | WT | WT |
| GSM972497 | CMS2         | primary | Female | 77 | III | T2 | N1 | M0 | Left  | N |       | 0 | 1   | 0 | 1   | pMMR | - | + | M  |    | WT |
| GSM972498 | CMS2         | primary | Female | 50 | III | T3 | N1 | M0 | Left  | N |       | 1 | 19  | 1 | 59  | pMMR | - | + | M  | WT | WT |
| GSM972499 | CMS1         | primary | Male   | 82 | III | T4 | N2 | M0 | Right | Y | FUFOL | 0 | 72  | 0 | 72  | dMMR | + | - | WT | WT | WT |
| GSM972500 | CMS4         | primary | Female | 74 | II  | T3 | N0 | M0 | Right | N |       |   |     |   |     |      | - | + |    | WT | WT |
| GSM972501 | CMS2         | primary | Female | 76 | III | T3 | N1 | M0 | Left  | N |       | 0 | 106 | 1 | 106 | pMMR | - | + | M  | WT | WT |
| GSM972502 | CMS3         | primary | Male   | 69 | II  | T3 | N0 | M0 | Left  | N |       | 0 | 131 | 0 | 131 | pMMR | - | + | WT | WT | WT |
| GSM972503 | CMS4         | primary | Female | 42 | II  | T3 | N0 | M0 | Left  | Y | 5FU   | 0 | 146 | 0 | 146 | pMMR | - |   | WT | WT | WT |
| GSM972504 | Undetermined | primary | Male   | 80 | III | T3 | N2 | M0 | Left  | N |       | 1 | 24  | 1 | 30  | pMMR | - | + | WT | M  | WT |
| GSM972505 | CMS2         | primary | Male   | 69 | II  | T3 | N0 | M0 | Left  | N |       | 0 | 144 | 0 | 144 | pMMR | - | + | WT | WT | WT |
| GSM972506 | CMS2         | primary | Male   | 68 | II  | T3 | N0 | M0 | Left  | N |       | 0 | 141 | 0 | 141 | pMMR | - |   | M  | WT | WT |
| GSM972507 | CMS1         | primary | Female | 83 | III | T3 | N1 | M0 | Right | N |       | 0 | 42  | 0 | 42  | dMMR | + | - | WT | WT | M  |
| GSM972508 | CMS2         | primary | Female | 69 | I   | T1 | N0 | M0 | Left  | N |       | 0 | 134 | 0 | 134 | pMMR | - | + | M  | M  | WT |
| GSM972509 | CMS2         | primary | Female | 73 | I   | T2 | N0 | M0 | Left  | N |       | 0 | 14  | 0 | 14  | pMMR | - | + | WT | WT | WT |
| GSM972510 | CMS3         | primary | Male   | 89 | II  | T3 | N0 | M0 | Left  | N |       | 0 | 86  | 0 | 86  | pMMR | - | - | WT | WT | WT |
| GSM972511 | CMS2         | primary | Male   | 75 | III | T3 | N2 | M0 | Right | Y | FUFOL | 0 | 47  | 1 | 47  | pMMR | - | + | M  | WT | WT |
| GSM972512 | CMS3         | primary | Male   | 62 | III | T4 | N2 | M0 | Right | Y | FOLFO | 1 | 4   | 1 | 23  | pMMR | + |   | WT | M  | WT |
| GSM972513 | CMS2         | primary | Male   | 85 | III | T3 | N1 | M0 | Right | N |       | 1 | 13  | 1 | 48  | pMMR | - | + | M  | M  | WT |
| GSM972514 | CMS2         | primary | Female | 79 | III | T2 | N1 | M0 | Left  | Y | FUFOL |   |     | 1 | 32  | pMMR | - | + | M  | WT | WT |
| GSM972515 | CMS2         | primary | Female | 72 | II  | T3 | N0 | M0 | Left  | N |       | 0 | 118 | 0 | 118 | pMMR | - |   | M  | WT | WT |
| GSM972516 | CMS2         | primary | Male   | 82 | II  | T3 | N0 | M0 | Left  | N |       | 0 | 66  | 0 | 66  | pMMR | - | + | WT | M  | WT |
| GSM972517 | CMS2         | primary | Female | 88 | II  | T3 | N0 | M0 | Left  | N |       | 1 | 32  | 1 | 37  | pMMR | - | + | M  | WT | WT |
| GSM972518 | Undetermined | primary | Female | 82 | III | T4 | N1 | M0 | Right | N |       | 1 | 15  | 1 | 35  | pMMR | - | + | M  | M  | WT |
| GSM972519 | Undetermined | primary | Male   | 58 | II  | T3 | N0 | M0 | Left  | N |       | 1 | 11  | 1 | 14  | pMMR | - | + | M  | WT | WT |
| GSM972520 | Undetermined | primary | Male   | 76 | III | T3 | N1 | M0 | Left  | Y | FUFOL | 0 | 62  | 1 | 62  | pMMR | - | + | M  | WT | WT |
| GSM972521 | CMS4         | primary | Female | 90 | II  | T3 | N0 | M0 | Right | N |       | 0 | 76  | 1 | 76  | pMMR | - | - | M  | WT | WT |
| GSM972522 | Undetermined | primary | Female | 53 | II  | T3 | N0 | M0 | Right | Y | 5FU   | 0 | 99  | 0 | 99  | pMMR | - | + | WT | M  | WT |

**Supplementary Table 4. Data of primary tumors from TCGA database.**

| sample ID        | SSP. CMS     | tumor site | age | gender | MSI status | pharmaceutical therapy | additional radiation therapy | tumor location | BMI   | pathologic_M | pathologic_N | pathologic_T | TNM stage | perineural invasion present | preceae level | venous_invasion | vital status | OS | OS.time | DSS | .time | DFI | DFI.time | PFI | PFI.time |
|------------------|--------------|------------|-----|--------|------------|------------------------|------------------------------|----------------|-------|--------------|--------------|--------------|-----------|-----------------------------|---------------|-----------------|--------------|----|---------|-----|-------|-----|----------|-----|----------|
| TCGA_3L_AA1B_01  | CMS_2        | primary    | 61  | Female | MSS        |                        |                              | Right          | 21.15 | M0           | N0           | T2           | I         | NO                          |               | NO              | LIVING       | 0  | 475     | 0   | 475   | 0   | 475      | 0   | 475      |
| TCGA_4N_A93T_01  | CMS_2        | primary    | 67  | Male   | MSS        |                        |                              | Right          | 47.68 | M0           | N1           | T4           | III       | NO                          | 2             | NO              | LIVING       | 0  | 146     | 0   | 146   |     |          | 0   | 146      |
| TCGA_4T_AA8H_01  | CMS_3        | primary    | 42  | Female |            |                        |                              | Left           | 38.43 | MX           | N0           | T3           | II        | NO                          |               | NO              | LIVING       | 0  | 385     | 0   | 385   | 0   | 385      | 0   | 385      |
| TCGA_5M_AA_T4_01 | CMS_2        | primary    | 74  | Male   | MSS        |                        |                              | Right          |       | M1           | N0           | T3           | IV        |                             | 550           | YES             | DECEASED     | 1  | 49      | 1   | 49    |     |          | 1   | 49       |
| TCGA_5M_AA_T6_01 | CMS_1        | primary    | 40  | Female | MSI_H      | YES                    | NO                           | Right          | 37.76 | M1           | N2           | T4           | IV        | YES                         | 2.61          | YES             | DECEASED     | 1  | 290     | 1   | 290   |     |          | 1   | 219      |
| TCGA_5M_AA_TE_01 | CMS_2        | primary    | 76  | Male   | MSS        | YES                    | NO                           | Right          | 24.07 | M0           | N0           | T3           | II        | NO                          | 2.91          | NO              | LIVING       | 0  | 1200    | 0   | 1200  |     |          | 1   | 810      |
| TCGA_A6_2675_01  | Undetermined | primary    | 78  | Male   |            |                        |                              | Left           | 27.85 | MX           | N0           | T3           | II        |                             |               | NO              | LIVING       | 0  | 1321    | 0   | 1321  | 0   | 1321     | 0   | 1321     |
| TCGA_A6_2682_01  | CMS_2        | primary    | 70  | Male   | MSS        | NO                     | NO                           |                | 29.78 | M1           | N1           | T4           | IV        |                             | 2.8           | YES             | DECEASED     | 1  | 424     | 1   | 424   |     |          | 1   | 381      |
| TCGA_A6_2684_01  | CMS_4        | primary    | 75  | Female |            | YES                    | YES                          | Right          | 26.38 | M0           | N0           | T2           | I         |                             |               | NO              | LIVING       | 0  | 1127    | 0   | 1127  |     |          | 1   | 976      |
| TCGA_A6_2685_01  | CMS_4        | primary    | 48  | Female | MSS        | YES                    | NO                           | Left           | 26.44 | M0           | N0           | T3           | II        |                             | 29.5          | NO              | LIVING       | 0  | 1133    | 0   | 1133  |     |          | 1   | 948      |
| TCGA_A6_2686_01  | CMS_1        | primary    | 81  | Female | MSI_H      |                        |                              | Right          | 25.56 | M0           | N0           | T3           | II        |                             | 2.2           | NO              | DECEASED     | 1  | 1126    | 0   | 1126  | 0   | 1126     | 0   | 1126     |
| TCGA_A6_4105_01  | CMS_2        | primary    | 79  | Male   | MSS        |                        |                              | Right          | 25.62 | M0           | N0           | T3           | II        |                             |               | NO              | DECEASED     | 1  | 442     | 0   | 442   |     |          | 1   | 364      |

|                 |              |         |    |        |       |     |       |       |       |    |    |     |     |      |     |        |        |      |     |      |     |      |   |      |     |
|-----------------|--------------|---------|----|--------|-------|-----|-------|-------|-------|----|----|-----|-----|------|-----|--------|--------|------|-----|------|-----|------|---|------|-----|
| TCGA_A6_5656_01 | CMS_2        | primary | 74 | Male   |       |     | Left  | 23.91 | M0    | N0 | T2 | I   |     | 5.1  | NO  | LIVING | 0      | 1001 | 0   | 1001 | 0   | 1001 | 0 | 1001 |     |
| TCGA_A6_5657_01 | CMS_4        | primary | 65 | Male   | MSS   |     |       | 33.67 | M0    | N1 | T3 | III |     | 1.5  | NO  | LIVING | 0      | 962  | 0   | 962  | 0   | 962  | 0 | 962  |     |
| TCGA_A6_5659_01 | CMS_2        | primary | 82 | Male   |       |     | Right | 36.14 | M0    | N0 | T2 | I   |     | 2.9  | NO  | LIVING | 0      | 926  | 0   | 926  | 0   | 926  | 0 | 926  |     |
| TCGA_A6_5660_01 | CMS_2        | primary | 73 | Male   | MSS   |     | Right | 32.66 | M0    | N2 | T3 | III |     | 0.8  | YES | LIVING | 0      | 888  | 0   | 888  | 0   | 888  | 0 | 888  |     |
| TCGA_A6_5661_01 | CMS_1        | primary | 80 | Female | MSI_H |     | Right | 23.91 | M0    | N0 | T3 | II  |     | 4.1  | NO  | LIVING | 0      | 1020 | 0   | 1020 | 0   | 1020 | 0 | 1020 |     |
| TCGA_A6_5662_01 | CMS_2        | primary | 46 | Male   | MSS   | YES | NO    | Left  | 26.05 | M1 | N2 | T3  | IV  |      | YES | LIVING | 0      | 718  | 0   | 718  |     |      | 1 | 495  |     |
| TCGA_A6_5664_01 | Undetermined | primary | 80 | Male   | MSS   | YES | NO    | Right | 21.63 | MX | N2 | T4  | III |      | YES | LIVING | 0      | 672  | 0   | 672  |     |      | 1 | 183  |     |
| TCGA_A6_5665_01 | CMS_1        | primary | 84 | Female | MSI_H | NO  | NO    | Right | 36.84 | M0 | N0 | T3  | II  |      | NO  | LIVING | 0      | 671  | 0   | 671  |     |      | 1 | 529  |     |
| TCGA_A6_5666_01 | CMS_2        | primary | 78 | Male   | MSI_L | YES | NO    | Left  | 25.61 | M0 | N0 | T4  | II  |      | NO  | LIVING | 0      | 995  | 0   | 995  | 1   | 509  | 1 | 509  |     |
| TCGA_A6_5667_01 | CMS_2        | primary | 40 | Female | MSS   |     | Left  | 24.82 | MX    | N1 | T3 | III |     | 36.3 | NO  | LIVING | 0      | 887  | 0   | 887  | 0   | 887  | 0 | 887  |     |
| TCGA_A6_6137_01 | CMS_2        | primary | 55 | Male   | MSS   |     | Right | 28.61 | M0    | N1 | T3 | III |     | 2.2  | NO  | LIVING | 0      | 824  | 0   | 824  | 0   | 824  | 0 | 824  |     |
| TCGA_A6_6138_01 | CMS_2        | primary | 61 | Male   | MSS   |     | Right | 26.39 | M0    | N0 | T2 | I   |     | 2.8  | NO  | LIVING | 0      | 685  | 0   | 685  |     |      | 0 | 685  |     |
| TCGA_A6_6140_01 | CMS_2        | primary | 62 | Male   | MSS   |     | Left  | 24.96 | M0    | N0 | T3 | II  |     | 1.3  | NO  | LIVING | 0      | 734  | 0   | 734  | 0   | 734  | 0 | 734  |     |
| TCGA_A6_6141_01 | CMS_3        | primary | 31 | Male   | MSS   |     | Right | 30.62 | M0    | N0 | T3 | II  |     | 5    | NO  | LIVING | 0      | 255  | 0   | 255  |     |      | 0 | 255  |     |
| TCGA_A6_6142_01 | CMS_4        | primary | 56 | Female | MSS   |     | Left  | 33.33 | M1    | N1 | T3 | IV  |     | 5.4  | YES | LIVING | 0      | 763  | 0   | 763  |     |      | 1 | 654  |     |
| TCGA_A6_6648_01 | CMS_2        | primary | 56 | Male   | MSS   | YES | NO    |       | 26.04 | M1 | N0 | T3  | IV  |      | 2.5 | NO     | LIVING | 0    | 766 | 0    | 766 |      |   | 1    | 686 |

|              |            |         |    |        |       |     |     |       |       |    |    |    |     |     |      |     |          |   |      |   |      |   |      |     |      |
|--------------|------------|---------|----|--------|-------|-----|-----|-------|-------|----|----|----|-----|-----|------|-----|----------|---|------|---|------|---|------|-----|------|
| TCGA_ A6_664 | Undermined | primary | 66 | Male   | MSS   |     |     | Right | 29.36 | M0 | N1 | T3 | III | YES | 10.9 | YES | LIVING   | 0 | 735  | 0 | 735  | 0 | 735  | 0   | 735  |
| TCGA_ A6_665 | CMS2       | primary | 69 | Female |       |     |     | Right | 35.82 | M0 | N0 | T3 | II  |     | 2.9  | NO  | LIVING   | 0 | 627  | 0 | 627  |   | 0    | 627 |      |
| TCGA_ A6_665 | CMS4       | primary | 55 | Female | MSS   |     |     | Right | 33.47 | MX | N1 | T3 | III |     | 0.4  | NO  | LIVING   | 0 | 662  | 0 | 662  |   | 0    | 662 |      |
| TCGA_ A6_665 | CMS2       | primary | 59 | Male   | MSS   |     |     | Left  | 40.20 | M1 | N0 | T3 | IV  |     | 4.8  | NO  | LIVING   | 0 | 751  | 0 | 751  |   | 0    | 751 |      |
| TCGA_ A6_665 | CMS1       | primary | 82 | Male   | MSI_H |     |     | Right | 29.42 | M0 | N0 | T2 | I   |     | 2.5  | NO  | LIVING   | 0 | 742  | 0 | 742  | 0 | 742  | 0   | 742  |
| TCGA_ A6_665 | CMS4       | primary | 65 | Female | MSS   |     |     | Left  | 32.54 | M0 | N1 | T3 | III |     | 2.7  | NO  | LIVING   | 0 | 726  | 0 | 726  | 0 | 726  | 0   | 726  |
| TCGA_ A6_678 | CMS1       | primary | 74 | Male   |       |     |     |       | 22.71 | MX | N0 | T3 | II  |     |      | NO  | LIVING   | 0 | 612  | 0 | 612  | 0 | 612  | 0   | 612  |
| TCGA_ A6_678 | CMS1       | primary | 43 | Male   |       |     |     | Right | 24.11 | MX | N1 | T4 | III |     | 6.5  | NO  | LIVING   | 0 | 598  | 0 | 598  | 0 | 598  | 0   | 598  |
| TCGA_ A6_678 | Undermined | primary | 82 | Male   | MSS   |     |     | Right | 20.64 | MX | N0 | T4 | II  | YES | 2.7  |     | LIVING   | 0 | 617  | 0 | 617  | 0 | 617  | 0   | 617  |
| TCGA_ A6_A56 | Undermined | primary | 34 | Female | MSI_L | YES | NO  | Right | 29.64 | MX | N2 | T3 | III |     | 71.5 | YES | DECEASED | 1 | 494  | 1 | 494  |   | 1    | 301 |      |
| TCGA_ A6_A56 | CMS4       | primary | 55 | Female | MSI_L | YES | YES | Left  | 25.82 | M0 | N1 | T4 | III |     |      |     | DECEASED | 1 | 758  | 1 | 758  |   | 1    | 257 |      |
| TCGA_ A6_A56 | CMS2       | primary | 56 | Male   | MSS   | YES | NO  | Left  | 23.77 | M1 | N1 | T3 | IV  |     | 95.8 | NO  | DECEASED | 1 | 1881 | 1 | 1881 |   | 1    | 612 |      |
| TCGA_ A6_A56 | CMS2       | primary | 57 | Male   | MSS   | NO  | NO  | Left  | 23.83 | M0 | N1 | T3 | III |     | 13.2 | NO  | DECEASED | 1 | 1711 | 0 | 1711 | 1 | 1678 | 1   | 1678 |
| TCGA_ A6_A5  | CMS4       | primary | 59 | Male   | MSS   |     |     | Right | 34.29 | M0 | N1 | T3 | III |     | 1.6  | NO  | LIVING   | 0 | 293  | 0 | 293  | 0 | 293  | 0   | 293  |
| TCGA_ AA_348 | CMS4       | primary | 75 | Male   | MSS   |     |     | Left  |       | M0 | N0 | T3 | II  |     | 1.7  |     | DECEASED | 1 | 214  | 1 | 214  |   | 1    | 214 |      |
| TCGA_ AA_349 | CMS1       | primary | 90 | Female | MSI_H |     |     | Right |       | M0 | N0 | T3 | II  |     |      | NO  | DECEASED | 1 | 92   | 0 | 92   |   | 0    | 92  |      |

|                 |              |         |    |        |       |       |    |    |    |     |       |     |        |   |      |   |      |   |      |   |      |
|-----------------|--------------|---------|----|--------|-------|-------|----|----|----|-----|-------|-----|--------|---|------|---|------|---|------|---|------|
| TCGA_AA_3495_01 | CMS2         | primary | 79 | Male   | MSS   | Right | M0 | N0 | T2 | I   | 1.9   |     | LIVING | 0 | 1127 | 0 | 1127 | 0 | 1127 | 0 | 1127 |
| TCGA_AA_3496_01 | CMS2         | primary | 83 | Female | MSI_L | Right | M0 | N0 | T3 | II  | 0.2   |     | LIVING | 0 | 31   | 0 | 31   |   | 0    |   | 31   |
| TCGA_AA_3502_01 | CMS3         | primary | 73 | Male   | MSI_L | Right | M0 | N0 | T2 | I   | 3.7   |     | LIVING | 0 | 1065 | 0 | 1065 | 0 | 1065 | 0 | 1065 |
| TCGA_AA_3506_01 | CMS2         | primary | 77 | Male   | MSS   | Right | M0 | N0 | T2 | I   | 2.08  |     | LIVING | 0 | 1765 | 0 | 1765 |   | 0    |   | 1765 |
| TCGA_AA_3509_01 | CMS2         | primary | 54 | Female | MSS   | Left  | M0 | N0 | T3 | II  | 2.82  | NO  | LIVING | 0 | 1915 | 0 | 1915 | 0 | 1915 | 0 | 1915 |
| TCGA_AA_3511_01 | CMS2         | primary | 64 | Male   | MSS   | Left  | M0 | N0 | T4 | II  | 35.95 | NO  | LIVING | 0 | 212  | 0 | 212  | 1 | 59   | 1 | 59   |
| TCGA_AA_3526_01 | CMS2         | primary | 57 | Male   | MSI_L | Left  | M0 | N0 | T2 | I   | 2.06  | NO  | LIVING | 0 | 580  | 0 | 580  | 0 | 580  | 0 | 580  |
| TCGA_AA_3655_01 | Undetermined | primary | 68 | Male   | MSS   | Left  | M0 | N0 | T3 | II  | 4     | NO  | LIVING | 0 | 1856 | 0 | 1856 | 0 | 1856 | 0 | 1856 |
| TCGA_AA_3660_01 | CMS2         | primary | 51 | Female | MSS   | Left  | M0 | N0 | T3 | II  | 1.37  | NO  | LIVING | 0 | 2375 | 0 | 2375 | 0 | 2375 | 0 | 2375 |
| TCGA_AA_3662_01 | CMS2         | primary | 80 | Female | MSS   | Left  | M1 | N2 | T4 | IV  | 1286  | NO  | LIVING | 0 | 184  | 0 | 184  |   | 0    |   | 184  |
| TCGA_AA_3663_01 | Undetermined | primary | 42 | Male   | MSI_H | Right | M0 | N0 | T3 | II  | 18.77 | NO  | LIVING | 0 | 212  | 0 | 212  | 0 | 212  | 0 | 212  |
| TCGA_AA_3675_01 | CMS2         | primary | 84 | Male   | MSS   | Right | M0 | N0 | T3 | II  | 5.06  | NO  | LIVING | 0 | 1431 | 0 | 1431 | 0 | 1431 | 0 | 1431 |
| TCGA_AA_3685_01 | CMS2         | primary | 69 | Male   | MSS   | Left  | M0 | N0 | T3 | II  | 8.76  | NO  | LIVING | 0 | 1127 | 0 | 1127 | 0 | 1127 | 0 | 1127 |
| TCGA_AA_3697_01 | CMS2         | primary | 77 | Male   | MSI_L | Left  | M0 | N0 | T3 | II  | 4.6   |     | LIVING | 0 | 2587 | 0 | 2587 |   | 0    |   | 2587 |
| TCGA_AA_3712_01 | CMS2         | primary | 65 | Male   | MSS   | Left  | M0 | N2 | T3 | III | 0.88  | YES | LIVING | 0 | 0    | 0 | 0    |   | 0    |   | 0    |
| TCGA_AA_3713_01 | CMS1         | primary | 68 | Male   | MSI_H | Right | M1 | N0 | T3 | IV  | 83.68 |     | LIVING | 0 | 579  | 0 | 579  |   | 0    |   | 579  |

|                 |              |         |    |        |       |     |     |       |       |    |    |     |     |       |     |          |          |      |      |      |      |      |      |      |      |
|-----------------|--------------|---------|----|--------|-------|-----|-----|-------|-------|----|----|-----|-----|-------|-----|----------|----------|------|------|------|------|------|------|------|------|
| TCGA_AA_A01P_01 | CMS_1        | primary | 80 | Female | MSI_H |     |     | Right | M0    | N1 | T3 | III |     | 1.11  |     | DECEASED | 1        | 1158 | 1    | 1158 |      | 1    | 762  |      |      |
| TCGA_AA_A01X_01 | CMS_2        | primary | 80 | Female | MSS   |     |     | Left  | M0    | N1 | T2 | III |     | 11.08 |     | LIVING   | 0        | 791  | 0    | 791  |      | 1    | 791  |      |      |
| TCGA_AA_A01Z_01 | CMS_2        | primary | 68 | Male   | MSS   |     |     | Right | M0    | N0 | T3 | II  |     | 18.87 |     | LIVING   | 0        | 1126 | 0    | 1126 |      | 1    | 1126 |      |      |
| TCGA_AA_A02K_01 | CMS_2        | primary | 50 | Male   | MSS   |     |     | Right | M1    | N2 | T4 | IV  |     |       | YES | DECEASED | 1        | 426  | 1    | 426  |      | 1    | 306  |      |      |
| TCGA_AA_A02Y_01 | CMS_3        | primary | 73 | Male   | MSS   |     |     | Right | M0    | N0 | T2 | I   |     | 0.98  | YES | LIVING   | 0        | 1216 | 0    | 1216 | 0    | 1216 | 0    | 1216 |      |
| TCGA_AD_5900_01 | CMS_1        | primary | 67 | Male   | MSI_H |     |     | Right | MX    | N0 | T2 | I   | NO  |       |     | LIVING   | 0        | 370  | 0    | 370  | 0    | 370  | 0    | 370  |      |
| TCGA_AD_6548_01 | Undetermined | primary | 81 | Female | MSI_L |     |     | Left  | 31.69 | M0 | N0 | T2  | I   |       | 2.6 |          | LIVING   | 0    | 650  | 0    | 650  | 0    | 650  | 0    | 650  |
| TCGA_AD_6888_01 | CMS_2        | primary | 73 | Male   | MSS   | NO  | NO  | Right | 28.67 | M0 | N1 | T3  | III | NO    |     | YES      | DECEASED | 1    | 472  | 1    | 472  | 1    | 343  | 1    | 343  |
| TCGA_AD_6889_01 | CMS_1        | primary | 76 | Male   | MSI_H |     |     | Right |       | M0 | N0 | T3  | II  |       | 7.5 | NO       | DECEASED | 1    | 2532 | 0    | 2532 | 1    | 1516 | 1    | 1516 |
| TCGA_AD_6890_01 | CMS_2        | primary | 65 | Male   | MSS   |     |     | Right |       | MX | N0 | T1  |     |       | 0.8 | NO       | LIVING   | 0    | 746  | 0    | 746  | 0    | 746  | 0    | 746  |
| TCGA_AD_6895_01 | CMS_1        | primary | 84 | Male   | MSI_H |     |     | Right | 23.53 | M0 | N1 | T3  | III |       |     | YES      | LIVING   | 0    | 763  | 0    | 763  | 0    | 763  | 0    | 763  |
| TCGA_AD_6899_01 | Undetermined | primary | 84 | Male   | MSS   |     |     | Right | 20.24 | MX | N2 | T4  | III |       | 6.1 | YES      | DECEASED | 1    | 176  | 0    | 176  | 0    | 176  | 0    | 176  |
| TCGA_AD_6901_01 | CMS_4        | primary | 78 | Male   | MSI_L | NO  | YES | Right | 23.88 | MX | N0 | T3  |     |       | 5.9 | NO       | DECEASED | 1    | 682  | 1    | 682  | 1    | 468  | 1    | 468  |
| TCGA_AD_6963_01 | CMS_2        | primary | 58 | Male   | MSS   |     |     | Right | 28.73 | MX | N0 | T3  |     |       | 5.5 | NO       | LIVING   | 0    | 834  | 0    | 834  | 0    | 834  | 0    | 834  |
| TCGA_AD_6964_01 | Undetermined | primary | 58 | Male   | MSI_H | NO  | NO  | Right | 27.17 |    | N2 | T4  |     |       |     | YES      | DECEASED | 1    | 331  | 1    | 331  |      | 1    | 325  |      |
| TCGA_AD_6965_01 | CMS_2        | primary | 62 | Male   | MSS   | YES | NO  | Right | 28.37 | M0 | N2 | T4  | III |       |     | YES      | LIVING   | 0    | 805  | 0    | 805  | 1    | 648  | 1    | 648  |

|                  |              |         |    |        |       |     |       |       |       |    |    |     |     |       |      |          |        |      |      |      |      |      |      |      |      |
|------------------|--------------|---------|----|--------|-------|-----|-------|-------|-------|----|----|-----|-----|-------|------|----------|--------|------|------|------|------|------|------|------|------|
| TCGA_AD_A5_EJ_01 | CMS_1        | primary | 74 | Female | MSI_H |     | Right | 26.72 | MX    | N0 | T3 | II  | NO  |       | NO   | LIVING   | 0      | 0    | 0    | 0    |      | 0    | 0    |      |      |
| TCGA_AD_A5_EK_01 | CMS_2        | primary | 51 | Male   | MSS   |     | Right | 27.70 | MX    | N0 | T2 | I   | NO  | 1.2   | NO   | LIVING   | 0      | 500  | 0    | 500  | 0    | 500  | 0    | 500  |      |
| TCGA_AF_2687_01  | CMS_4        | primary | 57 | Male   | MSS   | NO  | NO    | Left  | 25.67 | M0 | N2 | T3  | III |       | 5.3  | NO       | LIVING | 0    | 1427 | 0    | 1427 | 1    | 1267 | 1    | 1267 |
| TCGA_AF_2690_01  | CMS_4        | primary | 76 | Female | MSS   |     | Left  | 21.29 | M0    | N2 | T3 | III |     | 4.2   | YES  | DECEASED | 1      | 524  | 0    | 524  |      | 0    | 524  |      |      |
| TCGA_AF_2693_01  | CMS_2        | primary | 75 | Male   | MSS   |     | Left  | 33.10 | MX    | N0 | T2 | I   |     | 4     | NO   | LIVING   | 0      | 1155 | 0    | 1155 |      | 0    | 1155 |      |      |
| TCGA_AF_3911_01  | CMS_2        | primary | 48 | Male   | MSI_L | NO  | NO    | Left  | 29.07 | MX | N2 | T3  | III |       | 1.1  | NO       | LIVING | 0    | 1148 | 0    | 1148 | 1    | 695  | 1    | 695  |
| TCGA_AF_4110_01  | Undetermined | primary | 77 | Male   | MSS   |     | Left  | 26.03 | MX    | N2 | T4 | IV  |     | 28.7  | YES  | LIVING   | 0      | 912  | 0    | 912  |      | 0    | 912  |      |      |
| TCGA_AF_5654_01  | CMS_2        | primary | 73 | Female |       |     | Left  | 35.48 | M0    | N0 | T2 | I   |     |       | NO   | DECEASED | 1      | 512  | 0    | 512  |      | 0    | 512  |      |      |
| TCGA_AF_6136_01  | Undetermined | primary | 72 | Female | MSS   | YES | NO    | Left  | 25.83 | MX | N1 | T3  | III |       | 18.3 | YES      | LIVING | 0    | 741  | 0    | 741  |      | 1    | 199  |      |
| TCGA_AF_6655_01  | CMS_2        | primary | 66 | Male   | MSS   |     | Left  | 17.78 | M0    | N1 | T2 | III |     | 1.6   | NO   | LIVING   | 0      | 609  | 0    | 609  | 0    | 609  | 0    | 609  |      |
| TCGA_AF_6672_01  | CMS_3        | primary | 43 | Male   | MSS   | YES | NO    | Left  | 31.45 | MX | N2 | T4  | IV  |       | 9.6  | NO       | LIVING | 0    | 748  | 0    | 748  |      | 1    | 279  |      |
| TCGA_AF_A5_6K_01 | CMS_2        | primary | 56 | Male   | MSS   |     | Left  | 43.69 | M0    | N0 | T3 | II  |     | 0.5   | NO   | LIVING   | 0      | 2635 | 0    | 2635 | 1    | 1217 | 1    | 1217 |      |
| TCGA_AF_A5_6L_01 | CMS_2        | primary | 48 | Female | MSS   |     | Left  | 29.39 | M0    | N2 | T3 | III |     | 3.2   | NO   | LIVING   | 0      | 2007 | 0    | 2007 | 0    | 2007 | 0    | 2007 |      |
| TCGA_AF_A5_6N_01 | CMS_2        | primary | 47 | Female | MSS   |     | Left  | 28.65 | M0    | N0 | T3 | II  |     | 9.5   | NO   | LIVING   | 0      | 360  | 0    | 360  | 0    | 360  | 0    | 360  |      |
| TCGA_AG_3591_01  | CMS_3        | primary | 66 | Female | MSS   |     | Left  |       | M0    | N0 | T3 | II  |     | 15.72 | NO   | LIVING   | 0      | 1035 | 0    | 1035 | 0    | 1035 | 0    | 1035 |      |
| TCGA_AG_3592_01  | CMS_2        | primary | 68 | Male   | MSI_L |     | Left  |       | M0    | N0 | T3 | II  |     | 0.96  | NO   | LIVING   | 0      | 1035 | 0    | 1035 |      | 0    | 1035 |      |      |



|            |      |         |    |        |       |    |       |      |       |    |    |     |     |       |     |              |   |      |   |      |   |      |      |      |
|------------|------|---------|----|--------|-------|----|-------|------|-------|----|----|-----|-----|-------|-----|--------------|---|------|---|------|---|------|------|------|
| TCGA_25_01 | Unde | primary | 90 | Female | MSS   |    |       | Left | M0    | N2 | T3 | III |     | 6.08  | YES | LIVIN<br>G   | 0 | 638  | 0 | 638  |   | 0    | 638  |      |
| TCGA_31_01 | Unde | primary | 65 | Male   | MSI_L |    |       | Left | M1    | N1 | T3 | IV  |     | 32.08 |     | LIVIN<br>G   | 0 | 1126 | 0 | 1126 |   | 0    | 1126 |      |
| TCGA_32_01 | CMS3 | primary | 78 | Female | MSS   |    |       | Left | M0    | N0 | T2 | I   |     | 1.21  | NO  | LIVIN<br>G   | 0 | 1003 | 0 | 1003 | 0 | 1003 | 0    | 1003 |
| TCGA_42_01 | CMS2 | primary | 85 | Female | MSS   |    |       | Left | M0    | N0 | T1 | I   |     | 13.78 |     | LIVIN<br>G   | 0 | 30   | 0 | 30   |   | 0    | 30   |      |
| TCGA_02_01 | Unde | primary | 61 | Male   | MSS   |    |       | Left | M0    | N0 | T3 | II  |     | 8.14  | NO  | LIVIN<br>G   | 0 | 974  | 0 | 974  |   | 0    | 974  |      |
| TCGA_21_01 | Unde | primary | 84 | Female | MSS   |    |       | Left | M1    | N2 | T3 | IV  |     | 3101  | YES | DECE<br>ASED | 1 | 121  | 1 | 121  |   | 1    | 0    |      |
| TCGA_22_01 | CMS2 | primary | 59 | Female | MSS   |    |       | Left | M0    | N0 | T3 | II  |     | 1.03  | YES | LIVIN<br>G   | 0 | 1400 | 0 | 1400 | 0 | 1400 | 0    | 1400 |
| TCGA_44_01 | CMS2 | primary | 60 | Male   | MSS   |    | 28.79 | Left | M1    | N1 | T3 |     |     | 2497  |     | LIVIN<br>G   | 0 | 1173 | 0 | 1173 |   | 0    | 1173 |      |
| TCGA_47_01 | Unde | primary | 79 | Female | MSS   |    |       | Left | MX    | N0 | T3 |     |     |       | NO  | DECE<br>ASED | 1 | 76   | 0 | 76   | 0 | 76   | 0    | 76   |
| TCGA_49_01 | Unde | primary | 66 | Male   | MSI_L |    |       | Left | MX    | NX | T3 |     |     | 1.8   |     | LIVIN<br>G   | 0 | 532  | 0 | 532  | 0 | 532  | 0    | 532  |
| TCGA_43_01 | Unde | primary | 50 | Male   | MSS   | NO | NO    | Left | 25.91 | M0 | N2 | T3  | III | NO    | NO  | DECE<br>ASED | 1 | 1314 | 1 | 1314 | 1 | 1026 | 1    | 1026 |
| TCGA_44_01 | CMS4 | primary | 73 | Male   | MSI_L |    |       | Left | MX    | NX | T3 |     |     |       | NO  | LIVIN<br>G   | 0 | 838  | 0 | 838  | 0 | 838  | 0    | 838  |
| TCGA_97_01 | CMS2 | primary | 48 | Male   | MSI_L |    | 26.52 | Left | M0    | N0 | T2 | I   | NO  | 1.23  | NO  | LIVIN<br>G   | 0 | 804  | 0 | 804  | 0 | 804  | 0    | 804  |
| TCGA_03_01 | CMS2 | primary | 46 | Male   | MSS   |    | 22.34 | Left | M0    | N1 | T3 | III | NO  | 3.51  | NO  | LIVIN<br>G   | 0 | 592  | 0 | 592  | 0 | 592  | 0    | 592  |
| TCGA_20_01 | Unde | primary | 59 | Female | MSS   |    | 36.44 | Left | M1    | N2 | T4 | IV  | NO  | 176.1 | NO  | LIVIN<br>G   | 0 | 14   | 0 | 14   |   | 0    | 14   |      |
| TCGA_21_01 | CMS1 | primary | 68 | Female | MSI_H |    | 31.04 | Left | M0    | N0 | T3 | II  | NO  |       | NO  | LIVIN<br>G   | 0 | 28   | 0 | 28   |   | 0    | 28   |      |

|                 |              |         |    |        |       |     |       |       |       |    |    |     |     |      |     |          |        |      |     |      |     |      |      |      |     |
|-----------------|--------------|---------|----|--------|-------|-----|-------|-------|-------|----|----|-----|-----|------|-----|----------|--------|------|-----|------|-----|------|------|------|-----|
| TCGA_AU_3779_01 | CMS_2        | primary | 80 | Female | MSS   |     | Left  | 33.67 | M0    | N0 | T3 | II  | NO  |      | NO  | LIVING   | 0      | 441  | 0   | 441  |     | 0    | 441  |      |     |
| TCGA_AU_6004_01 | CMS_1        | primary | 69 | Female | MSI_H |     | Right | 21.48 | M0    | N0 | T2 | I   | NO  |      | NO  | LIVING   | 0      | 824  | 0   | 824  |     | 0    | 824  |      |     |
| TCGA_AY_5543_01 | CMS_2        | primary | 65 | Female | MSS   |     | Right |       | M1    | N1 | T3 | IV  | NO  |      | NO  | LIVING   | 0      | 1004 | 0   | 1004 |     | 0    | 1004 |      |     |
| TCGA_AY_6196_01 | CMS_4        | primary | 47 | Male   | MSI_L |     | Right |       |       | N2 | T3 | III | NO  | 5.5  | NO  | LIVING   | 0      | 6    | 0   | 6    |     | 0    | 6    |      |     |
| TCGA_AY_6197_01 | Undetermined | primary | 60 | Male   | MSI_H |     | Right |       |       | N0 | T3 | II  | NO  |      | NO  | LIVING   | 0      | 652  | 0   | 652  | 0   | 652  | 0    | 652  |     |
| TCGA_AY_6386_01 | CMS_3        | primary | 66 | Female | MSS   |     | Right | 36.74 | M0    | N1 | T3 | III | NO  | 1.3  | NO  | LIVING   | 0      | 542  | 0   | 542  | 0   | 542  | 0    | 542  |     |
| TCGA_AY_A54L_01 | CMS_2        | primary | 74 | Female | MSI_L | YES | NO    | Right | 22.99 | M0 | N0 | T2  | I   | NO   | 2.5 | NO       | LIVING | 0    | 525 | 0    | 525 | 1    | 396  | 1    | 396 |
| TCGA_AY_A69D_01 | CMS_2        | primary | 55 | Female | MSI_L |     | Right | 37.83 | M0    | N0 | T3 | II  | NO  | 1    | NO  | LIVING   | 0      | 543  | 0   | 543  | 0   | 543  | 0    | 543  |     |
| TCGA_AY_A71X_01 | CMS_3        | primary | 54 | Female | MSS   |     | Right | 48.33 | M0    | N0 | T2 | I   | NO  | 4.8  | NO  | LIVING   | 0      | 588  | 0   | 588  | 0   | 588  | 0    | 588  |     |
| TCGA_AY_A8YK_01 | CMS_2        | primary | 44 | Male   | MSS   |     | Left  | 25.16 | M1    | N2 | T3 | IV  | NO  | 5.9  | YES | LIVING   | 0      | 573  | 0   | 573  |     | 0    | 573  |      |     |
| TCGA_AZ_4313_01 | CMS_1        | primary | 51 | Female | MSI_H |     | Left  |       | M0    | N0 | T1 | I   | NO  | 5.9  | YES | LIVING   | 0      | 2310 | 0   | 2310 | 0   | 2310 | 0    | 2310 |     |
| TCGA_AZ_4315_01 | Undetermined | primary | 61 | Male   | MSS   |     | Right |       | M0    | N0 | T3 | II  | NO  | 1.5  | NO  | LIVING   | 0      | 1776 | 0   | 1776 |     | 0    | 1776 |      |     |
| TCGA_AZ_4323_01 | CMS_4        | primary | 37 | Male   | MSI_L |     | Right |       | M1    | N2 | T4 | IV  |     |      | YES | DECEASED | 1      | 43   | 1   | 43   |     | 1    | 43   |      |     |
| TCGA_AZ_4614_01 | CMS_1        | primary | 71 | Female | MSI_L |     |       |       | M1    | N1 | T4 | IV  | NO  | 49.7 | YES | DECEASED | 1      | 172  | 1   | 172  |     | 1    | 172  |      |     |
| TCGA_AZ_4615_01 | CMS_1        | primary | 84 | Male   | MSI_H | NO  |       | 29.07 | M0    | N1 | T3 | III | NO  | 2.1  | YES | LIVING   | 0      | 1002 | 0   | 1002 |     | 1    | 688  |      |     |
| TCGA_AZ_4616_01 | Undetermined | primary | 82 | Female | MSI_L |     | Right |       | M1    | N2 | T3 | IV  | YES |      | YES | DECEASED | 1      | 156  | 1   | 156  |     | 1    | 156  |      |     |

|                 |              |         |    |        |       |     |       |       |       |    |     |     |      |     |          |          |          |      |      |      |      |     |      |      |
|-----------------|--------------|---------|----|--------|-------|-----|-------|-------|-------|----|-----|-----|------|-----|----------|----------|----------|------|------|------|------|-----|------|------|
| TCGA_AZ_4682_01 | CMS2         | primary | 61 | Male   | MSS   |     | Left  | M1    | N0    | T3 | IV  |     |      | NO  | DECEASED | 1        | 680      | 1    | 680  |      | 1    | 680 |      |      |
| TCGA_AZ_4684_01 | CMS2         | primary | 49 | Male   | MSI_L | YES | NO    |       | M1    | N2 | T3  | IV  | 8.9  |     | LIVING   | 0        | 1977     | 0    | 1977 |      | 1    | 411 |      |      |
| TCGA_AZ_5403_01 | CMS2         | primary | 43 | Male   | MSS   | YES | NO    | Left  | MX    | N0 | T3  | II  | YES  | 2.3 | NO       | DECEASED | 1        | 1910 | 1    | 1910 |      | 1   | 304  |      |
| TCGA_AZ_5407_01 | CMS3         | primary | 51 | Female | MSS   |     | Right | M0    | N0    | T1 | I   |     |      | NO  | LIVING   | 0        | 2683     | 0    | 2683 | 0    | 2683 | 0   | 2683 |      |
| TCGA_AZ_6598_01 | CMS1         | primary | 77 | Female | MSI_H |     |       | MX    | N0    | T3 | II  | NO  | 7.5  | NO  | DECEASED | 1        | 1503     | 0    | 1503 | 0    | 1503 | 0   | 1503 |      |
| TCGA_AZ_6599_01 | CMS3         | primary | 72 | Male   | MSS   |     | Right | MX    | N0    | T2 | I   | NO  |      | NO  | DECEASED | 1        | 206      | 0    | 206  | 0    | 206  | 0   | 206  |      |
| TCGA_AZ_6600_01 | Undetermined | primary | 64 | Male   | MSS   |     | Right | M1    | N1    | T4 | IV  | YES | 20.1 | YES | DECEASED | 1        | 368      | 1    | 368  |      | 1    | 368 |      |      |
| TCGA_AZ_6601_01 | CMS1         | primary | 68 | Male   | MSI_H | NO  | NO    | Left  | 22.48 | M0 | N0  | T3  | II   | YES | 1.8      | YES      | DECEASED | 1    | 3042 | 1    | 3042 |     | 1    | 2270 |
| TCGA_AZ_6603_01 | CMS2         | primary | 77 | Female | MSS   |     | Left  | MX    | N1    | T2 |     | NO  |      | NO  | DECEASED | 1        | 899      | 0    | 899  | 0    | 899  | 0   | 899  |      |
| TCGA_AZ_6605_01 | CMS4         | primary | 77 | Male   | MSS   |     | Right | M0    | N1    | T4 | III | NO  | 2.5  | YES | DECEASED | 1        | 159      | 0    | 159  |      | 0    | 159 |      |      |
| TCGA_AZ_6606_01 | Undetermined | primary | 81 | Male   | MSS   |     | Right | M1    | N2    | T4 | IV  | YES | 10.6 | YES | DECEASED | 1        | 357      | 1    | 357  |      | 1    | 357 |      |      |
| TCGA_AZ_6607_01 | CMS4         | primary | 69 | Male   | MSS   |     | Left  | M1    | N2    | T4 | IV  | YES | 22.6 | YES | DECEASED | 1        | 97       | 1    | 97   |      | 1    | 97  |      |      |
| TCGA_AZ_6608_01 | CMS2         | primary | 55 | Female | MSI_L |     | Left  | M0    | N1    | T2 | III | NO  | 3.7  | YES | DECEASED | 1        | 59       |      | 59   |      | 0    | 59  |      |      |
| TCGA_BM_6198_01 | Undetermined | primary | 73 | Male   | MSS   |     | Left  |       | N1    | T3 | III | NO  | 81.3 | NO  | LIVING   | 0        | 646      | 0    | 646  | 0    | 646  | 0   | 646  |      |
| TCGA_CA_5254_01 | CMS1         | primary | 42 | Female | MSI_L |     | Right | 23.19 | M0    | N0 | T3  | II  |      |     | LIVING   | 0        | 386      | 0    | 386  | 0    | 386  | 0   | 386  |      |
| TCGA_CA_5255_01 | CMS3         | primary | 45 | Male   | MSS   |     | Right | 18.93 | M0    | N0 | T3  | II  |      |     | LIVING   | 0        | 376      | 0    | 376  | 0    | 376  | 0   | 376  |      |

|                  |              |         |    |        |       |     |     |       |       |    |    |    |     |      |     |          |        |      |      |      |      |      |   |      |      |
|------------------|--------------|---------|----|--------|-------|-----|-----|-------|-------|----|----|----|-----|------|-----|----------|--------|------|------|------|------|------|---|------|------|
| TCGA_CA_52_56_01 | CMS_2        | primary | 54 | Female | MSS   |     |     | Right | 20.31 | M0 | N0 | T3 | II  |      |     | LIVING   | 0      | 379  | 0    | 379  | 0    | 379  | 0 | 379  |      |
| TCGA_CA_57_96_01 | CMS_3        | primary | 52 | Female | MSS   |     |     | Right |       | M0 | N0 | T3 | II  |      |     | LIVING   | 0      | 377  | 0    | 377  | 0    | 377  | 0 | 377  |      |
| TCGA_CA_57_97_01 | CMS_2        | primary | 56 | Male   | MSS   |     |     | Left  |       | M0 | N0 | T3 | II  |      |     | LIVING   | 0      | 383  | 0    | 383  | 0    | 383  | 0 | 383  |      |
| TCGA_CA_67_15_01 | CMS_2        | primary | 63 | Male   | MSS   |     |     | Left  | 22.83 | M0 | N1 | T3 | III |      |     | LIVING   | 0      | 383  | 0    | 383  | 0    | 383  | 0 | 383  |      |
| TCGA_CA_67_16_01 | CMS_2        | primary | 65 | Male   | MSS   |     |     | Right | 20.80 | M0 | N0 | T3 | II  |      |     | LIVING   | 0      | 371  | 0    | 371  | 0    | 371  | 0 | 371  |      |
| TCGA_CA_67_17_01 | CMS_4        | primary | 57 | Male   | MSS   |     |     | Right | 20.55 | M0 | N0 | T3 | II  |      |     | LIVING   | 0      | 388  | 0    | 388  | 0    | 388  | 0 | 388  |      |
| TCGA_CA_67_18_01 | CMS_1        | primary | 46 | Male   | MSS   | NO  | YES | Right | 22.32 | M0 | N0 | T3 | II  |      |     | DECEASED | 1      | 306  | 1    | 306  | 1    | 207  | 1 | 207  |      |
| TCGA_CA_67_19_01 | CMS_4        | primary | 77 | Male   | MSI_L | NO  | NO  | Left  | 20.62 | M0 | N0 | T3 | II  |      |     | LIVING   | 0      | 435  | 0    | 435  |      |      | 1 | 354  |      |
| TCGA_CI_661_9_01 | CMS_2        | primary | 41 | Male   | MSS   |     |     | Left  |       | M1 | N1 | T3 | IV  | 52.7 |     | LIVING   | 0      | 184  | 0    | 184  |      |      | 0 | 184  |      |
| TCGA_CI_662_0_01 | Undetermined | primary | 41 | Female | MSS   | YES | NO  | Left  |       | M1 | N1 | T3 | IV  |      |     | LIVING   | 0      | 1009 | 0    | 1009 |      |      | 1 | 90   |      |
| TCGA_CI_662_1_01 | CMS_2        | primary | 63 | Male   | MSS   |     |     | Left  |       | MX | N1 | T3 | III |      |     | LIVING   | 0      | 419  | 0    | 419  |      |      | 0 | 419  |      |
| TCGA_CI_662_2_01 | CMS_2        | primary | 74 | Male   | MSS   |     |     | Left  |       | M0 | N0 | T4 | II  | YES  | YES | LIVING   | 0      | 1362 | 0    | 1362 |      |      | 0 | 1362 |      |
| TCGA_CI_662_3_01 | CMS_2        | primary | 44 | Male   | MSS   |     |     | Left  |       | M0 | N0 | T1 | I   | NO   | 5.9 | NO       | LIVING | 0    | 1443 | 0    | 1443 |      |   | 0    | 1443 |
| TCGA_CI_662_4_01 | CMS_2        | primary | 53 | Female | MSS   |     |     | Left  |       | M0 | N0 | T2 | I   | NO   | 7   | NO       | LIVING | 0    | 1466 | 0    | 1466 |      |   | 0    | 1466 |
| TCGA_CK_49_47_01 | CMS_2        | primary | 46 | Female | MSS   | YES | NO  | Left  |       | M0 | N1 | T4 | III | 2.5  |     | LIVING   | 0      | 534  | 0    | 534  |      |      | 1 | 21   |      |
| TCGA_CK_49_48_01 | CMS_2        | primary | 45 | Female | MSI_L |     |     | Left  |       | M0 | N1 | T3 | III | 1.2  |     | LIVING   | 0      | 4502 | 0    | 4502 | 0    | 4502 | 0 | 4502 |      |

|            |        |              |         |    |        |       |     |       |       |    |    |     |     |       |     |          |          |      |      |      |      |      |      |      |
|------------|--------|--------------|---------|----|--------|-------|-----|-------|-------|----|----|-----|-----|-------|-----|----------|----------|------|------|------|------|------|------|------|
| TCGA_50_01 | CK_49  | CMS_3        | primary | 68 | Female | MSS   |     | Right | M0    | N1 | T3 | III | NO  |       | NO  | LIVING   | 0        | 2599 | 0    | 2599 | 0    | 2599 | 0    | 2599 |
| TCGA_51_01 | CK_49  | CMS_1        | primary | 79 | Female | MSI_H | NO  | NO    | Right | M0 | N0 | T3  | II  | NO    | 6.2 | YES      | DECEASED | 1    | 2134 | 0    | 2134 |      | 1    | 480  |
| TCGA_52_01 | CK_49  | Undetermined | primary | 48 | Female | MSS   |     | Right | M0    | N2 | T4 | III | NO  |       | NO  | LIVING   | 0        | 475  | 0    | 475  |      | 0    | 475  |      |
| TCGA_12_01 | CK_59  | CMS_2        | primary | 81 | Male   | MSS   |     | Right | MX    | N0 | T2 | I   | NO  | 1.3   | NO  | DECEASED | 1        | 1493 | 0    | 1493 | 0    | 1493 | 0    | 1493 |
| TCGA_13_01 | CK_59  | CMS_1        | primary | 58 | Female | MSI_H |     | Right | MX    | N0 | T3 | II  | NO  | 0.6   | NO  | LIVING   | 0        | 1561 | 0    | 1561 | 0    | 1561 | 0    | 1561 |
| TCGA_14_01 | CK_59  | CMS_2        | primary | 81 | Male   | MSS   |     | Left  | MX    | N1 | T3 | III | NO  |       | NO  | LIVING   | 0        | 669  | 0    | 669  |      | 0    | 669  |      |
| TCGA_15_01 | CK_59  | CMS_2        | primary | 63 | Male   | MSS   |     | Left  | MX    | N0 | T2 | I   | NO  |       | NO  | LIVING   | 0        | 0    | 0    | 0    |      | 0    | 0    |      |
| TCGA_16_01 | CK_59  | CMS_1        | primary | 71 | Female | MSI_H | YES | NO    | Right | M0 | N0 | T1  | I   | NO    | 3.2 | NO       | DECEASED | 1    | 643  | 1    | 643  |      | 1    | 292  |
| TCGA_46_01 | CK_67  | CMS_1        | primary | 84 | Female | MSI_H |     | Right | MX    | N0 | T4 | II  | YES |       | NO  | LIVING   | 0        | 0    | 0    | 0    |      | 0    | 0    |      |
| TCGA_47_01 | CK_67  | Undetermined | primary | 87 | Female | MSI_H |     | Right | MX    | N0 | T3 | II  | NO  | 0.9   | NO  | LIVING   | 0        | 2523 | 0    | 2523 | 0    | 2523 | 0    | 2523 |
| TCGA_48_01 | CK_67  | CMS_4        | primary | 45 | Female | MSS   |     | Left  | M1    | N1 | T3 | IV  | NO  | 400.3 | NO  | LIVING   | 0        | 61   | 0    | 61   |      | 0    | 61   |      |
| TCGA_51_01 | CK_67  | Undetermined | primary | 88 | Female | MSS   |     | Right | MX    | N0 | T2 | I   | NO  | 1.3   | NO  | LIVING   | 0        | 3780 | 0    | 3780 |      | 0    | 3780 |      |
| TCGA_7_01  | CL_495 | CMS_2        | primary | 79 | Female | MSS   |     |       | M0    | N1 | T3 |     |     |       |     | DECEASED | 0        | 425  | 0    | 425  | 0    | 425  | 0    | 425  |
| TCGA_7_01  | CL_591 | CMS_2        | primary | 71 | Female | MSS   |     | Left  | MX    | N2 | T3 | III | YES | 0.6   | YES | LIVING   | 0        | 2376 | 0    | 2376 | 0    | 2376 | 0    | 2376 |
| TCGA_8_01  | CL_591 | CMS_2        | primary | 90 | Female | MSS   |     | Left  | MX    | N0 | T3 | II  | NO  | 2.2   | NO  | LIVING   | 0        | 218  | 0    | 218  | 0    | 218  | 0    | 218  |
| TCGA_43_01 | CM_47  | CMS_1        | primary | 69 | Male   | MSI_H |     | Right | M0    | N0 | T3 | II  | NO  | 4     | NO  | LIVING   | 0        | 701  | 0    | 701  | 0    | 701  | 0    | 701  |

|               |              |         |    |        |       |    |       |       |    |    |    |     |     |     |     |          |   |     |   |     |   |     |     |     |
|---------------|--------------|---------|----|--------|-------|----|-------|-------|----|----|----|-----|-----|-----|-----|----------|---|-----|---|-----|---|-----|-----|-----|
| TCGA_44_01    | CMS_2        | primary | 69 | Male   | MSS   |    | Right | 26.78 | M0 | N0 | T2 | I   | NO  | 0.9 | YES | LIVING   | 0 | 609 | 0 | 609 | 0 | 609 | 0   | 609 |
| TCGA_47_01    | CMS_2        | primary | 47 | Male   | MSI_L | NO | Right | 21.70 | M1 | N1 | T4 | IV  | YES | 2.6 | NO  | LIVING   | 0 | 761 | 0 | 761 |   | 0   | 761 |     |
| TCGA_51_01    | Undetermined | primary | 62 | Male   | MSS   |    | Right | 34.34 | M0 | N1 | T3 | III | YES | 4.2 | YES | LIVING   | 0 | 822 | 0 | 822 | 0 | 822 | 0   | 822 |
| TCGA_53_44_01 | Undetermined | primary | 39 | Female | MSS   |    | Left  | 26.67 | M0 | N1 | T3 | III | YES | 1.9 | NO  | LIVING   | 0 | 670 | 0 | 670 |   | 0   | 670 |     |
| TCGA_53_48_01 | CMS_4        | primary | 72 | Male   | MSS   |    | Right | 32.18 | M0 | N1 | T3 | III | YES | 3.6 | NO  | LIVING   | 0 | 699 | 0 | 699 |   | 0   | 699 |     |
| TCGA_53_49_01 | CMS_2        | primary | 68 | Female | MSS   |    | Right | 22.35 | M0 | N0 | T3 | II  | NO  | 3   | NO  | LIVING   | 0 | 915 | 0 | 915 |   | 0   | 915 |     |
| TCGA_58_60_01 | CMS_4        | primary | 44 | Male   | MSS   |    | Right | 30.40 | M0 | N0 | T3 | II  | YES | 3   | YES | LIVING   | 0 | 974 | 0 | 974 |   | 0   | 974 |     |
| TCGA_58_61_01 | CMS_1        | primary | 63 | Female | MSI_H | NO | Right | 45.36 | M0 | N0 | T3 | II  | YES | 3.2 | NO  | LIVING   | 0 | 457 | 0 | 457 |   | 1   | 335 |     |
| TCGA_58_62_01 | CMS_2        | primary | 80 | Male   | MSS   | NO | Right | 29.39 | M1 | N1 | T3 | IV  | NO  | 10  | YES | DECEASED | 1 | 153 | 1 | 153 |   | 1   | 31  |     |
| TCGA_58_63_01 | CMS_3        | primary | 60 | Female | MSS   |    | Right | 45.96 | M0 | N1 | T3 | III | YES | 4.7 | YES | LIVING   | 0 | 457 | 0 | 457 |   | 0   | 457 |     |
| TCGA_58_64_01 | CMS_2        | primary | 60 | Male   | MSS   |    | Right | 31.79 | M0 | N0 | T2 | I   | NO  | 2.8 | NO  | LIVING   | 0 | 457 | 0 | 457 |   | 0   | 457 |     |
| TCGA_58_68_01 | CMS_2        | primary | 59 | Female | MSS   |    | Left  | 34.13 | M1 | N1 | T4 | IV  | YES | 93  | YES | LIVING   | 0 | 518 | 0 | 518 |   | 0   | 518 |     |
| TCGA_61_61_01 | CMS_2        | primary | 36 | Female | MSI_L |    | Left  | 21.67 | M0 | N0 | T2 | I   | NO  | 0.4 | NO  | LIVING   | 0 | 457 | 0 | 457 |   | 0   | 457 |     |
| TCGA_61_62_01 | Undetermined | primary | 48 | Female | MSI_H |    | Right | 37.28 | M0 | N1 | T3 | III | YES | 1.1 | YES | LIVING   | 0 | 365 | 0 | 365 |   | 0   | 365 |     |
| TCGA_61_63_01 | CMS_2        | primary | 74 | Male   | MSS   |    | Left  | 23.66 | M0 | N0 | T1 | I   | YES | 8.8 | YES | LIVING   | 0 | 427 | 0 | 427 |   | 0   | 427 |     |
| TCGA_61_64_01 | CMS_2        | primary | 46 | Female | MSS   |    | Left  | 26.22 | M0 | N0 | T3 | II  | YES | 9.6 | YES | LIVING   | 0 | 883 | 0 | 883 |   | 0   | 883 |     |

|                  |              |         |    |        |       |     |     |       |       |    |    |    |     |     |       |     |          |   |      |   |      |   |     |   |     |
|------------------|--------------|---------|----|--------|-------|-----|-----|-------|-------|----|----|----|-----|-----|-------|-----|----------|---|------|---|------|---|-----|---|-----|
| TCGA_CM_61_65_01 | CMS_2        | primary | 74 | Male   | MSS   |     |     | Left  | 28.19 | M0 | N0 | T3 | II  | NO  | 1.9   | NO  | LIVING   | 0 | 488  | 0 | 488  | 0 | 488 |   |     |
| TCGA_CM_61_66_01 | CMS_2        | primary | 48 | Female | MSS   |     |     | Right | 19.22 | M0 | N0 | T2 | I   | NO  | 1.3   | NO  | LIVING   | 0 | 669  | 0 | 669  | 0 | 669 |   |     |
| TCGA_CM_61_67_01 | CMS_4        | primary | 57 | Female | MSS   |     |     | Right | 29.40 | M0 | N2 | T3 | III | YES | 5.5   | YES | LIVING   | 0 | 456  | 0 | 456  | 0 | 456 |   |     |
| TCGA_CM_61_68_01 | CMS_4        | primary | 84 | Female | MSI_L |     |     | Right | 23.65 | M0 | N0 | T3 | II  | NO  | 7.8   | YES | LIVING   | 0 | 395  | 0 | 395  | 0 | 395 |   |     |
| TCGA_CM_61_69_01 | CMS_4        | primary | 67 | Male   | MSS   |     |     | Right | 35.29 | M0 | N0 | T3 | II  | YES | 4.6   | YES | LIVING   | 0 | 396  | 0 | 396  | 0 | 396 |   |     |
| TCGA_CM_61_70_01 | CMS_2        | primary | 73 | Female | MSS   |     |     | Left  | 40.81 | M0 | N0 | T2 | I   | NO  | 0.8   | NO  | LIVING   | 0 | 457  | 0 | 457  | 0 | 457 |   |     |
| TCGA_CM_61_71_01 | CMS_1        | primary | 77 | Female | MSI_H |     |     | Right | 27.13 | M0 | N0 | T2 | I   | NO  | 2     | NO  | LIVING   | 0 | 427  | 0 | 427  | 0 | 427 |   |     |
| TCGA_CM_61_72_01 | Undetermined | primary | 70 | Female | MSS   |     |     | Left  | 34.03 | M0 | N1 | T3 | III | NO  | 2.8   | NO  | LIVING   | 0 | 335  | 0 | 335  | 0 | 335 |   |     |
| TCGA_CM_66_74_01 | CMS_1        | primary | 39 | Male   | MSI_H |     |     | Right | 28.94 | M0 | N0 | T3 | II  | NO  | 1.1   | NO  | LIVING   | 0 | 394  | 0 | 394  | 0 | 394 |   |     |
| TCGA_CM_66_75_01 | CMS_1        | primary | 35 | Male   | MSS   | YES | NO  | Right | 26.85 | M1 | N2 | T3 | IV  | YES | 2     | YES | LIVING   | 0 | 397  | 0 | 397  | 1 | 337 |   |     |
| TCGA_CM_66_76_01 | CMS_2        | primary | 82 | Male   | MSI_L |     |     | Left  | 36.73 | M0 | N0 | T2 | I   | NO  | 4.5   | NO  | LIVING   | 0 | 337  | 0 | 337  | 0 | 337 |   |     |
| TCGA_CM_66_77_01 | CMS_2        | primary | 75 | Female | MSS   |     |     | Right | 35.68 | M0 | N0 | T3 | II  | NO  | 3.7   | NO  | LIVING   | 0 | 337  | 0 | 337  | 0 | 337 |   |     |
| TCGA_CM_66_78_01 | CMS_2        | primary | 63 | Female | MSS   | YES | NO  | Left  | 23.94 | M1 | N1 | T4 | IV  | NO  | 286.6 | NO  | LIVING   | 0 | 335  | 0 | 335  | 1 | 0   |   |     |
| TCGA_CM_66_79_01 | Undetermined | primary | 58 | Male   | MSS   |     |     | Left  | 33.61 | M0 | N0 | T3 | II  | NO  | 2.3   | NO  | LIVING   | 0 | 306  | 0 | 306  | 0 | 306 |   |     |
| TCGA_CM_66_80_01 | CMS_3        | primary | 78 | Female | MSS   |     |     | Right | 32.18 | M0 | N2 | T3 | III | NO  | 1.4   | NO  | LIVING   | 0 | 366  | 0 | 366  | 0 | 366 |   |     |
| TCGA_D5_5537_01  | CMS_2        | primary | 83 | Male   | MSS   | YES | YES | Right | 26.57 | MX | N2 | T3 | II  | NO  |       | NO  | DECEASED | 1 | 1381 | 1 | 1381 | 1 | 722 | 1 | 722 |

|            |                            |         |    |        |       |     |    |       |       |    |    |    |     |     |       |     |              |   |      |   |      |   |      |      |      |
|------------|----------------------------|---------|----|--------|-------|-----|----|-------|-------|----|----|----|-----|-----|-------|-----|--------------|---|------|---|------|---|------|------|------|
| TCGA_8_01  | Unde<br>D5_553<br>termined | primary | 60 | Female | MSS   | NO  | NO | Right | 25.71 | M0 | N1 | T3 | III | NO  | 4.11  | NO  | DECE<br>ASED | 1 | 1661 | 1 | 1661 |   | 1    | 1007 |      |
| TCGA_9_01  | CMS<br>D5_553<br>3         | primary | 60 | Male   | MSS   | NO  | NO | Right | 29.41 | M0 | N1 | T3 | III |     | 5.1   |     | LIVIN<br>G   | 0 | 596  | 0 | 596  |   | 1    | 579  |      |
| TCGA_10_01 | CMS<br>D5_554<br>2         | primary | 73 | Male   | MSI_L |     |    | Right | 27.10 | M0 | N0 | T3 | II  | NO  | 1.7   | NO  | LIVIN<br>G   | 0 | 1706 | 0 | 1706 | 0 | 1706 | 0    | 1706 |
| TCGA_11_01 | CMS<br>D5_554<br>2         | primary | 63 | Male   | MSS   |     |    | Left  | 28.03 | M0 | N1 | T3 | III | NO  | 2.3   | NO  | LIVIN<br>G   | 0 | 1701 | 0 | 1701 | 0 | 1701 | 0    | 1701 |
| TCGA_19_01 | Unde<br>D5_652<br>termined | primary | 69 | Male   | MSI_L | YES | NO |       | 34.22 | M0 | N0 | T3 | II  | YES | 8.4   | NO  | LIVIN<br>G   | 0 | 614  | 0 | 614  |   | 1    | 386  |      |
| TCGA_20_01 | CMS<br>D5_653<br>3         | primary | 53 | Male   | MSI_H |     |    |       | 26.87 | M0 | N0 | T2 | I   | YES | 3.5   | NO  | LIVIN<br>G   | 0 | 621  | 0 | 621  |   | 0    | 621  |      |
| TCGA_21_01 | Unde<br>D5_653<br>termined | primary | 75 | Male   | MSS   |     |    | Right | 21.51 | M0 | N0 | T3 | II  | NO  | 1.9   | NO  | LIVIN<br>G   | 0 | 540  | 0 | 540  |   | 0    | 540  |      |
| TCGA_22_01 | CMS<br>D5_653<br>2         | primary | 61 | Male   | MSI_L |     |    | Left  | 30.39 | M0 | N0 | T3 | II  | NO  | 1.7   | NO  | LIVIN<br>G   | 0 | 555  | 0 | 555  |   | 0    | 555  |      |
| TCGA_23_01 | CMS<br>D5_653<br>2         | primary | 68 | Female | MSS   |     |    | Right | 20.96 | M0 | N0 | T4 |     | YES | 228.8 | NO  | LIVIN<br>G   | 0 | 775  | 0 | 775  | 0 | 775  | 0    | 775  |
| TCGA_24_01 | CMS<br>D5_653<br>4         | primary | 62 | Female | MSS   |     |    | Right | 32.53 | M0 | N0 | T3 | II  | YES | 0.9   | NO  | LIVIN<br>G   | 0 | 1316 | 0 | 1316 | 0 | 1316 | 0    | 1316 |
| TCGA_25_01 | Unde<br>D5_653<br>termined | primary | 80 | Female | MSS   |     |    | Right | 26.37 | MX | N1 | T3 | III | YES | 66.7  | NO  | LIVIN<br>G   | 0 | 460  | 0 | 460  |   | 0    | 460  |      |
| TCGA_26_01 | Unde<br>D5_653<br>termined | primary | 73 | Male   | MSS   | NO  | NO | Left  | 30.49 | M0 | N0 | T3 | II  | YES |       | NO  | LIVIN<br>G   | 0 | 543  | 0 | 543  |   | 1    | 493  |      |
| TCGA_27_01 | CMS<br>D5_653<br>2         | primary | 64 | Male   | MSS   | NO  | NO | Right | 25.83 | MX | N1 | T3 | III | YES | 2.7   | NO  | DECE<br>ASED | 1 | 146  | 1 | 146  |   | 1    | 123  |      |
| TCGA_28_01 | CMS<br>D5_653<br>2         | primary | 79 | Female | MSI_L |     |    | Right | 24.67 | M0 | N2 | T3 | III | NO  | 23.5  | YES | LIVIN<br>G   | 0 | 521  | 0 | 521  |   | 0    | 521  |      |
| TCGA_29_01 | Unde<br>D5_653<br>termined | primary | 45 | Female | MSS   |     |    | Right | 23.14 | M0 | N0 | T3 |     | YES | 1.1   | NO  | LIVIN<br>G   | 0 | 380  | 0 | 380  |   | 0    | 380  |      |
| TCGA_30_01 | CMS<br>D5_654<br>1         | primary | 66 | Male   | MSI_H |     |    | Right | 24.86 | M0 | N0 | T2 | I   | NO  | 2     | NO  | LIVIN<br>G   | 0 | 491  | 0 | 491  |   | 0    | 491  |      |



|                     |                    |         |    |        |       |  |       |       |    |    |    |     |     |     |     |            |   |     |   |     |   |     |   |     |
|---------------------|--------------------|---------|----|--------|-------|--|-------|-------|----|----|----|-----|-----|-----|-----|------------|---|-----|---|-----|---|-----|---|-----|
| TCGA_D5_654<br>1 01 | CMS<br>4           | primary | 49 | Male   | MSS   |  | Left  | 28.08 | M0 | N0 | T3 | II  | NO  | 2   | NO  | LIVIN<br>G | 0 | 474 | 0 | 474 | 0 | 474 |   |     |
| TCGA_D5_689<br>8 01 | CMS<br>2           | primary | 51 | Female | MSS   |  | Left  | 37.18 | M0 | N0 | T2 | I   | NO  | 8.1 | NO  | LIVIN<br>G | 0 | 229 | 0 | 229 | 0 | 229 |   |     |
| TCGA_D5_692<br>0 01 | Unde<br>rmi<br>ned | primary | 77 | Female | MSS   |  | Left  | 28.52 | M0 | N0 | T3 | II  | NO  | 1.7 | NO  | LIVIN<br>G | 0 | 377 | 0 | 377 | 0 | 377 |   |     |
| TCGA_D5_692<br>2 01 | Unde<br>rmi<br>ned | primary | 76 | Male   | MSS   |  | Left  | 27.10 | M0 | N1 | T3 | III | NO  | 4.3 | NO  | LIVIN<br>G | 0 | 308 | 0 | 308 | 0 | 308 |   |     |
| TCGA_D5_692<br>3 01 | Unde<br>rmi<br>ned | primary | 57 | Male   | MSS   |  | Left  | 31.17 | M0 | N0 | T2 | I   | NO  | 1.8 | NO  | LIVIN<br>G | 0 | 378 | 0 | 378 | 0 | 378 |   |     |
| TCGA_D5_692<br>4 01 | CMS<br>2           | primary | 68 | Male   | MSS   |  | Left  | 31.22 | M0 | N0 | T3 | II  | NO  | 3.1 | NO  | LIVIN<br>G | 0 | 435 | 0 | 435 | 0 | 435 |   |     |
| TCGA_D5_692<br>6 01 | CMS<br>4           | primary | 65 | Male   | MSS   |  | Left  | 26.78 | M0 | N1 | T4 | III | NO  | 2.2 | NO  | LIVIN<br>G | 0 | 275 | 0 | 275 | 0 | 275 |   |     |
| TCGA_D5_692<br>7 01 | CMS<br>1           | primary | 34 | Male   | MSI_H |  | Right | 24.26 | M0 | N0 | T3 | II  | NO  | 0.9 | NO  | LIVIN<br>G | 0 | 287 | 0 | 287 | 0 | 287 |   |     |
| TCGA_D5_692<br>8 01 | CMS<br>1           | primary | 80 | Male   | MSI_H |  | Right | 30.72 | M0 | N0 | T3 | II  | NO  | 1.8 | NO  | LIVIN<br>G | 0 | 354 | 0 | 354 | 0 | 354 |   |     |
| TCGA_D5_692<br>9 01 | CMS<br>2           | primary | 49 | Female | MSI_L |  | Left  | 28.69 | M1 | N1 | T3 | IV  | YES | 4.5 | NO  | LIVIN<br>G | 0 | 408 | 0 | 408 | 0 | 408 |   |     |
| TCGA_D5_693<br>0 01 | CMS<br>1           | primary | 67 | Male   | MSI_H |  | Right | 26.58 | M0 | N0 | T3 | II  | YES | 3   | NO  | LIVIN<br>G | 0 | 406 | 0 | 406 | 0 | 406 |   |     |
| TCGA_D5_693<br>1 01 | Unde<br>rmi<br>ned | primary | 77 | Male   | MSS   |  | Right | 22.09 | M0 | N2 | T4 | III | YES | 6.9 | NO  | LIVIN<br>G | 0 | 365 | 0 | 365 | 0 | 365 |   |     |
| TCGA_D5_693<br>2 01 | CMS<br>2           | primary | 69 | Male   | MSS   |  | Right | 26.57 | M0 | N0 | T3 | II  | YES | 3.8 | NO  | LIVIN<br>G | 0 | 346 | 0 | 346 | 0 | 346 |   |     |
| TCGA_D5_700<br>0 01 | CMS<br>1           | primary | 79 | Female | MSS   |  | Right | 25.30 | M0 | N0 | T2 | I   | NO  | 2.4 | NO  | LIVIN<br>G | 0 | 312 | 0 | 312 | 0 | 312 |   |     |
| TCGA_DC_47<br>45 01 | CMS<br>2           | primary | 49 | Female | MSS   |  | Left  | 34.45 | M0 | N1 | T3 | III | NO  | 1.6 | NO  | LIVIN<br>G | 0 | 639 | 0 | 639 | 0 | 639 | 0 | 639 |
| TCGA_DC_47<br>49 01 | CMS<br>2           | primary | 57 | Male   | MSS   |  | Left  | 27.18 | M0 | N0 | T2 | I   | NO  | 1.3 | YES | LIVIN<br>G | 0 | 762 | 0 | 762 | 0 | 762 | 0 | 762 |

|                  |              |         |    |        |       |    |       |       |       |    |    |     |     |      |       |          |        |      |     |      |     |      |    |
|------------------|--------------|---------|----|--------|-------|----|-------|-------|-------|----|----|-----|-----|------|-------|----------|--------|------|-----|------|-----|------|----|
| TCGA_DC_37_01    | CMS_2        | primary | 69 | Male   | MSS   |    | Left  | 25.49 | M0    | N0 | T1 | I   | NO  | 2    | NO    | LIVING   | 0      | 792  | 0   | 792  | 0   | 792  |    |
| TCGA_DC_69_01    | CMS_2        | primary | 62 | Female | MSS   |    | Left  | 21.59 | M0    | N1 | T3 | III | NO  | 3.6  | NO    | LIVING   | 0      | 943  | 0   | 943  | 0   | 943  |    |
| TCGA_DC_54_01    | CMS_2        | primary | 57 | Female | MSI_H |    | Left  | 22.63 | M1    | N2 | T4 | IV  | YES | 16.3 | YES   | LIVING   | 0      | 365  | 0   | 365  | 0   | 365  |    |
| TCGA_DC_55_01    | CMS_2        | primary | 31 | Female | MSS   |    | Left  | 20.81 | M0    | N1 | T2 | III | NO  | 1.3  | YES   | LIVING   | 0      | 425  | 0   | 425  | 0   | 425  |    |
| TCGA_DC_56_01    | CMS_4        | primary | 62 | Male   | MSS   | NO | NO    | Left  | 28.11 | M1 | N2 | T4  | IV  | YES  | 129.7 | YES      | LIVING | 0    | 943 | 0    | 943 | 1    | 30 |
| TCGA_DC_57_01    | CMS_2        | primary | 48 | Male   | MSS   |    | Left  | 33.89 | M0    | N0 | T2 | I   | NO  | 2.2  | NO    | LIVING   | 0      | 1581 | 0   | 1581 | 0   | 1581 |    |
| TCGA_DC_58_01    | CMS_4        | primary | 70 | Male   | MSS   |    | Left  | 28.01 | M0    | N0 | T2 | I   | YES | 1.7  | YES   | DECEASED | 1      | 334  | 0   | 334  | 0   | 334  |    |
| TCGA_DC_60_01    | CMS_2        | primary | 68 | Male   | MSS   |    | Left  | 32.54 | M0    | N0 | T2 | I   | YES | 5.2  | YES   | LIVING   | 0      | 1339 | 0   | 1339 | 0   | 1339 |    |
| TCGA_DC_81_01    | CMS_2        | primary | 70 | Female | MSS   |    | Left  | 27.67 | M1    | N2 | T3 | IV  | YES | 7.9  | YES   | LIVING   | 0      | 790  | 0   | 790  | 0   | 790  |    |
| TCGA_DC_82_01    | CMS_2        | primary | 57 | Male   | MSS   |    | Left  | 50.92 | M0    | N0 | T3 | II  | NO  | 13.8 | NO    | LIVING   | 0      | 762  | 0   | 762  | 0   | 762  |    |
| TCGA_DC_83_01    | CMS_2        | primary | 43 | Male   | MSS   |    | Left  | 24.66 | M0    | N1 | T3 | III | YES | 11.1 | YES   | LIVING   | 0      | 762  | 0   | 762  | 0   | 762  |    |
| TCGA_DM_A0_X9_01 | CMS_2        | primary | 71 | Female | MSS   |    |       | 29.76 | M0    | N0 | T3 | II  |     |      | NO    | LIVING   | 0      | 3641 | 0   | 3641 | 0   | 3641 |    |
| TCGA_DM_A0_XD_01 | Undetermined | primary | 65 | Male   | MSI_L | NO |       | 24.22 | M0    | N0 | T3 | II  |     |      | NO    | DECEASED | 1      | 743  |     | 743  | 1   | 484  |    |
| TCGA_DM_A0_XF_01 | CMS_2        | primary | 68 | Female | MSI_L |    |       | 29.41 | M0    | N2 | T3 | III |     |      | NO    | DECEASED | 1      | 1162 |     | 1162 | 0   | 1162 |    |
| TCGA_DM_A1_D0_01 | CMS_2        | primary | 79 | Female | MSS   |    | Left  | 22.49 | M0    | N0 | T3 | II  |     |      | NO    | LIVING   | 0      | 3974 | 0   | 3974 | 0   | 3974 |    |
| TCGA_DM_A1_D4_01 | CMS_2        | primary | 80 | Male   | MSI_L | NO | Right | 20.18 | M0    | N0 | T3 | II  |     |      | NO    | DECEASED | 1      | 2821 |     | 2821 | 1   | 1920 |    |

|                  |              |         |    |        |       |     |       |       |    |    |    |     |  |    |          |   |      |      |      |      |      |
|------------------|--------------|---------|----|--------|-------|-----|-------|-------|----|----|----|-----|--|----|----------|---|------|------|------|------|------|
| TCGA_DM_A1 D6_01 | CMS_3        | primary | 88 | Male   | MSS   |     | Left  | 26.73 | M0 | N0 | T3 | II  |  | NO | DECEASED | 1 | 1518 | 1518 | 0    | 1518 |      |
| TCGA_DM_A1 D7_01 | CMS_2        | primary | 82 | Male   | MSS   | NO  | Left  | 24.49 | M0 | N0 | T3 | II  |  | NO | DECEASED | 1 | 405  | 405  | 1    | 80   |      |
| TCGA_DM_A1 D8_01 | CMS_2        | primary | 50 | Female | MSS   |     | Right | 26.04 |    | N1 | T3 |     |  |    | DECEASED | 1 | 383  | 383  | 0    | 383  |      |
| TCGA_DM_A1 D9_01 | CMS_2        | primary | 67 | Female | MSS   |     | Right | 41.86 | M0 | N0 | T3 | II  |  | NO | LIVING   | 0 | 4270 | 0    | 4270 | 0    | 4270 |
| TCGA_DM_A1 DA_01 | CMS_1        | primary | 71 | Female | MSI_L |     | Right | 23.34 | M0 | N2 | T3 | III |  |    | DECEASED | 1 | 228  | 228  | 0    | 228  |      |
| TCGA_DM_A1 DB_01 | CMS_2        | primary | 68 | Male   | MSS   |     | Left  | 26.89 | M0 | N0 | T3 | II  |  | NO | DECEASED | 1 | 1348 | 1348 | 0    | 1348 |      |
| TCGA_DM_A1 HA_01 | Undetermined | primary | 82 | Male   | MSS   |     | Right | 25.22 | M0 | N2 | T3 | III |  |    | LIVING   | 0 | 4000 | 0    | 4000 | 0    | 4000 |
| TCGA_DM_A1 HB_01 | CMS_1        | primary | 75 | Male   | MSI_H |     | Right | 24.80 | M0 | N1 | T3 | III |  | NO | LIVING   | 0 | 4126 | 0    | 4126 | 0    | 4126 |
| TCGA_DM_A2 80_01 | Undetermined | primary | 70 | Female | MSS   |     | Right | 24.92 | M0 | N0 | T3 | II  |  | NO | DECEASED | 1 | 236  | 236  | 0    | 236  |      |
| TCGA_DM_A2 82_01 | CMS_2        | primary | 60 | Female | MSS   |     | Right | 18.80 | M0 | N0 | T3 | II  |  | NO | LIVING   | 0 | 4233 | 0    | 4233 | 0    | 4233 |
| TCGA_DM_A2 85_01 | Undetermined | primary | 71 | Female | MSS   |     | Right | 23.51 | M1 | N2 | T3 | IV  |  |    | DECEASED | 1 | 179  | 179  | 0    | 179  |      |
| TCGA_DM_A2 88_01 | Undetermined | primary | 68 | Male   | MSS   | YES | Right | 29.41 | M0 | N2 | T3 | III |  | NO | DECEASED | 1 | 427  | 427  | 1    | 320  |      |
| TCGA_DM_A2 8A_01 | CMS_2        | primary | 78 | Male   | MSS   |     | Right | 24.34 | M0 | N2 | T3 | III |  | NO | DECEASED | 1 | 805  | 805  | 0    | 805  |      |
| TCGA_DM_A2 8C_01 | CMS_2        | primary | 74 | Male   | MSS   | NO  | Left  | 21.60 | M0 | N0 | T3 | II  |  |    | DECEASED | 1 | 2475 | 2475 | 1    | 1929 |      |
| TCGA_DM_A2 8E_01 | CMS_2        | primary | 72 | Female | MSS   |     | Left  | 33.33 | M0 | N0 | T3 | II  |  | NO | LIVING   | 0 | 3648 | 0    | 3648 | 0    | 3648 |
| TCGA_DM_A2 8F_01 | CMS_2        | primary | 73 | Male   | MSS   |     | Left  | 25.06 | M0 | N1 | T3 | III |  |    | DECEASED | 1 | 1094 | 1094 | 0    | 1094 |      |

|                  |              |         |    |        |       |     |       |       |    |    |    |     |     |      |          |        |      |      |      |      |      |     |
|------------------|--------------|---------|----|--------|-------|-----|-------|-------|----|----|----|-----|-----|------|----------|--------|------|------|------|------|------|-----|
| TCGA_DM_A2_8G_01 | CMS_2        | primary | 75 | Male   | MSS   |     | Right | 31.14 | M0 | N0 | T3 | II  |     | NO   | DECEASED | 1      | 1849 | 1849 | 0    | 1849 |      |     |
| TCGA_DM_A2_8H_01 | CMS_2        | primary | 50 | Male   | MSI_L | YES | Right | 27.46 | M0 | N2 | T3 | III |     | NO   | LIVING   | 0      | 3561 | 0    | 3561 | 1    | 484  |     |
| TCGA_DM_A2_8K_01 | CMS_3        | primary | 75 | Male   | MSS   |     | Right | 25.76 | M0 | N0 | T3 | II  |     | NO   | LIVING   | 0      | 2988 | 0    | 2988 | 0    | 2988 |     |
| TCGA_DM_A2_8M_01 | Undetermined | primary | 63 | Male   | MSS   |     | Left  | 30.42 | M0 | N0 | T3 | II  |     | NO   | LIVING   | 0      | 2895 | 0    | 2895 | 0    | 2895 |     |
| TCGA_DT_52_65_01 | Undetermined | primary | 51 | Male   | MSS   |     | Left  |       | M0 | N0 | T3 | II  |     |      | LIVING   | 0      | 384  | 0    | 384  | 0    | 384  |     |
| TCGA_DY_A0_XA_01 | CMS_2        | primary | 57 | Female | MSS   |     | Left  | 25.32 | M0 | N0 | T3 | II  |     | NO   | LIVING   | 0      | 3846 | 0    | 3846 | 0    | 3846 |     |
| TCGA_DY_A1_DC_01 | CMS_2        | primary | 72 | Female | MSS   | YES | Left  |       | M0 | N0 | T3 | II  |     | NO   | DECEASED | 1      | 1258 | 1258 | 1    | 630  |      |     |
| TCGA_DY_A1_DD_01 | CMS_2        | primary | 77 | Female | MSI_L |     | Left  | 17.26 | M0 | N1 | T3 | III |     |      | DECEASED | 1      | 1741 | 1741 | 0    | 1741 |      |     |
| TCGA_DY_A1_DE_01 | CMS_2        | primary | 56 | Female | MSS   |     | Left  | 27.34 | M0 | N0 | T3 | II  |     | NO   | LIVING   | 0      | 3932 | 0    | 3932 | 1    | 3316 |     |
| TCGA_DY_A1_DF_01 | Undetermined | primary | 73 | Female | MSI_L |     | Left  | 30.82 | M0 | N2 | T3 | III |     |      | DECEASED | 1      | 734  | 734  | 0    | 734  |      |     |
| TCGA_DY_A1_DG_01 | CMS_2        | primary | 75 | Male   | MSS   |     | Left  | 28.08 | M1 | N1 | T3 | IV  |     |      | DECEASED | 1      | 1566 | 1566 | 1    | 592  |      |     |
| TCGA_DY_A1_H8_01 | CMS_2        | primary | 77 | Female | MSS   |     | Left  | 15.63 | M0 | N1 | T2 | III |     |      | DECEASED | 1      | 992  | 992  | 0    | 992  |      |     |
| TCGA_EF_583_0_01 | CMS_2        | primary | 54 | Male   | MSS   |     | Left  | 28.08 | M0 | N0 | T4 | II  | NO  | NO   | LIVING   | 0      | 106  | 0    | 106  | 0    | 106  |     |
| TCGA_EF_583_1_01 | CMS_2        | primary | 72 | Male   | MSS   |     | Left  | 22.86 | M0 | N0 | T3 | II  |     |      | LIVING   | 0      | 127  | 0    | 127  | 0    | 127  |     |
| TCGA_EI_650_6_01 | CMS_2        | primary | 78 | Female | MSS   |     | Left  | 24.77 | M0 | N0 | T3 | II  | YES | 2.8  | NO       | LIVING | 0    | 625  | 0    | 625  | 0    | 625 |
| TCGA_EI_650_7_01 | CMS_1        | primary | 60 | Male   | MSI_H |     | Left  | 17.43 | M0 | N0 | T3 | II  | NO  | 10.7 | NO       | LIVING | 0    | 607  | 0    | 607  | 0    | 607 |

|                 |              |         |    |        |       |    |      |       |       |    |    |     |     |      |      |          |        |     |     |     |     |     |     |
|-----------------|--------------|---------|----|--------|-------|----|------|-------|-------|----|----|-----|-----|------|------|----------|--------|-----|-----|-----|-----|-----|-----|
| TCGA_EI_6508_01 | CMS_2        | primary | 48 | Female | MSS   |    | Left | 26.11 | M0    | N1 | T3 | III | YES | 0.6  | NO   | LIVING   | 0      | 636 | 0   | 636 | 0   | 636 |     |
| TCGA_EI_6509_01 | CMS_2        | primary | 53 | Male   | MSS   | NO | NO   | Left  | 25.88 | M0 | N2 | T3  | III | NO   | 2.8  | NO       | LIVING | 0   | 517 | 0   | 517 | 1   | 90  |
| TCGA_EI_6510_01 | CMS_3        | primary | 77 | Female | MSI_L |    | Left | 26.22 | MX    | N0 | T2 |     | YES | 11.2 | NO   | LIVING   | 0      | 556 | 0   | 556 | 0   | 556 |     |
| TCGA_EI_6511_01 | CMS_2        | primary | 52 | Male   | MSS   |    | Left | 25.34 | M0    | N1 | T3 | III | YES | 14.9 | NO   | LIVING   | 0      | 482 | 0   | 482 | 0   | 482 |     |
| TCGA_EI_6512_01 | Undetermined | primary | 64 | Female | MSS   |    | Left | 21.11 | M0    | N1 | T3 | III | NO  | 1    | NO   | LIVING   | 0      | 538 | 0   | 538 | 0   | 538 |     |
| TCGA_EI_6513_01 | CMS_2        | primary | 59 | Male   | MSS   |    | Left | 25.47 | M0    | N1 | T3 | III | NO  | 1    | NO   | LIVING   | 0      | 497 | 0   | 497 | 0   | 497 |     |
| TCGA_EI_6514_01 | CMS_2        | primary | 59 | Female | MSS   |    | Left |       | M0    | N0 | T3 | II  | NO  | 5.5  | NO   | LIVING   | 0      | 496 | 0   | 496 | 0   | 496 |     |
| TCGA_EI_6881_01 | CMS_2        | primary | 60 | Male   | MSS   |    | Left | 27.76 | M0    | N1 | T3 | III | NO  | 60.3 | NO   | LIVING   | 0      | 499 | 0   | 499 | 0   | 499 |     |
| TCGA_EI_6882_01 | CMS_3        | primary | 59 | Male   | MSI_H |    | Left | 34.09 | M0    | N0 | T3 | II  | NO  | 1.3  | NO   | LIVING   | 0      | 262 | 0   | 262 | 0   | 262 |     |
| TCGA_EI_6883_01 | CMS_2        | primary | 63 | Male   | MSS   |    | Left | 22.53 | M0    | N0 | T3 | II  | NO  | 1.6  | NO   | LIVING   | 0      | 350 | 0   | 350 | 0   | 350 |     |
| TCGA_EI_6884_01 | Undetermined | primary | 71 | Male   | MSS   |    | Left | 26.49 | M0    | N1 | T3 | III | NO  | 10.7 | NO   | LIVING   | 0      | 328 | 0   | 328 | 0   | 328 |     |
| TCGA_EI_6885_01 | Undetermined | primary | 57 | Female | MSS   | NO | NO   | Left  | 19.71 | M1 | N1 | T3  | IV  | YES  | 7868 | NO       | LIVING | 0   | 415 | 0   | 415 | 1   | 295 |
| TCGA_EI_6917_01 | CMS_1        | primary | 33 | Male   | MSS   |    | Left | 25.83 | M0    | N1 | T3 | III | NO  | 2.1  | NO   | LIVING   | 0      | 531 | 0   | 531 | 0   | 531 |     |
| TCGA_EI_7002_01 | CMS_2        | primary | 58 | Male   | MSI_L |    | Left | 27.17 | M1    | N2 | T3 | IV  |     | 140  | NO   | LIVING   | 0      | 364 | 0   | 364 | 0   | 364 |     |
| TCGA_EI_7004_01 | CMS_4        | primary | 37 | Female | MSS   |    | Left | 29.75 | M0    | N2 | T4 |     | NO  | 3.2  | NO   | LIVING   | 0      | 257 | 0   | 257 | 0   | 257 |     |
| TCGA_F4_6459_01 | CMS_4        | primary | 61 | Female | MSS   |    | Left | 20.96 | M0    | N2 | T3 | III | NO  |      | NO   | DECEASED | 1      | 262 | 0   | 262 | 0   | 262 |     |

|         |      |        |         |    |        |       |     |    |       |       |    |    |    |     |    |      |          |        |      |    |      |    |      |   |      |
|---------|------|--------|---------|----|--------|-------|-----|----|-------|-------|----|----|----|-----|----|------|----------|--------|------|----|------|----|------|---|------|
| TCGA_01 | Unde | F4_646 | primary | 51 | Female | MSS   | YES | NO | Left  | 25.86 | M0 | N1 | T3 | III | NO | NO   | DECEASED | 1      | 972  | 1  | 972  | 1  | 313  | 1 | 313  |
| TCGA_01 | CMS  | F4_646 | primary | 41 | Female | MSS   |     |    | Right | 25.00 | M0 | N2 | T4 | III | NO | NO   | DECEASED | 1      | 338  | 1  | 338  |    | 1    |   | 288  |
| TCGA_01 | Unde | F4_646 | primary | 51 | Male   | MSS   |     |    | Right | 20.48 | M0 | N0 | T3 | II  | NO | NO   | LIVING   | 0      | 1087 | 0  | 1087 | 0  | 1087 | 0 | 1087 |
| TCGA_01 | CMS  | F4_656 | primary | 60 | Male   | MSS   |     |    | Right | 18.52 | M0 | N0 | T2 | I   | NO | NO   | LIVING   | 0      | 1087 | 0  | 1087 | 0  | 1087 | 0 | 1087 |
| TCGA_01 | CMS  | F4_657 | primary | 78 | Female | MSI_H |     |    | Right | 23.34 | M0 | N0 | T3 | II  | NO | NO   | DECEASED | 1      | 188  | 0  | 188  |    | 0    |   | 188  |
| TCGA_01 | CMS  | F4_670 | primary | 64 | Male   | MSI_H |     |    | Right | 28.39 | M0 | N0 | T3 | II  | NO | NO   | LIVING   | 0      | 1456 | 0  | 1456 | 0  | 1456 | 0 | 1456 |
| TCGA_01 | CMS  | F4_670 | primary | 60 | Male   | MSS   |     |    | Left  | 48.67 | MX | N2 | T3 | III |    | 14.9 | NO       | LIVING | 0    | 47 | 0    | 47 |      | 0 | 47   |
| TCGA_01 | CMS  | F4_680 | primary | 58 | Female | MSS   |     |    | Left  | 22.86 | M0 | N0 | T3 | II  | NO | NO   | LIVING   | 0      | 1047 | 0  | 1047 | 0  | 1047 | 0 | 1047 |
| TCGA_01 | Unde | F4_680 | primary | 59 | Female | MSS   | YES | NO | Left  | 23.66 | M0 | N0 | T2 | I   | NO | NO   | LIVING   | 0      | 1260 | 0  | 1260 | 1  | 336  | 1 | 336  |
| TCGA_01 | CMS  | F4_680 | primary | 51 | Female | MSS   |     |    | Right | 20.69 | M0 | N2 | T3 | III | NO | NO   | LIVING   | 0      | 1309 | 0  | 1309 | 0  | 1309 | 0 | 1309 |
| TCGA_01 | CMS  | F4_680 | primary | 54 | Female | MSS   |     |    | Left  | 25.40 | M0 | N0 | T1 | I   | NO | NO   | LIVING   | 0      | 1024 | 0  | 1024 | 0  | 1024 | 0 | 1024 |
| TCGA_01 | CMS  | F4_680 | primary | 52 | Female | MSS   |     |    | Left  | 39.11 | M1 | N1 | T3 | IV  | NO | NO   | DECEASED | 1      | 403  | 1  | 403  |    | 1    |   | 403  |
| TCGA_01 | CMS  | F4_685 | primary | 77 | Female | MSS   |     |    | Left  | 22.84 | M0 | N0 | T3 | II  | NO | NO   | LIVING   | 0      | 16   | 0  | 16   | 0  | 16   | 0 | 16   |
| TCGA_01 | CMS  | F4_685 | primary | 70 | Female | MSI_L |     |    | Left  | 28.69 | M0 | N0 | T3 | II  | NO | NO   | LIVING   | 0      | 1442 | 0  | 1442 | 0  | 1442 | 0 | 1442 |
| TCGA_01 | CMS  | F4_685 | primary | 45 | Male   | MSI_H |     |    | Right | 23.83 | M0 | N0 | T2 | I   | NO | NO   | LIVING   | 0      | 1074 | 0  | 1074 | 0  | 1074 | 0 | 1074 |
| TCGA_01 | CMS  | F5_646 | primary | 77 | Female | MSS   |     |    | Left  | 26.90 | M0 | N2 | T4 | III | NO | NO   | DECEASED | 1      | 303  |    | 303  |    | 0    |   | 303  |

|                  |              |         |    |        |       |        |       |       |    |    |    |     |     |     |          |   |      |   |      |   |      |      |      |
|------------------|--------------|---------|----|--------|-------|--------|-------|-------|----|----|----|-----|-----|-----|----------|---|------|---|------|---|------|------|------|
| TCGA_5_01_F5_646 | CMS_4        | primary | 64 | Female | MSS   |        | Left  | 21.45 | M0 | N0 | T3 | II  | NO  | NO  | LIVING   | 0 | 1506 | 0 | 1506 | 0 | 1506 | 0    | 1506 |
| TCGA_1_01_F5_657 | CMS_4        | primary | 62 | Female | MSI_L | YES NO | Left  | 29.03 | M0 | N0 | T3 | II  | NO  | NO  | LIVING   | 0 | 1288 | 0 | 1288 | 1 | 122  | 1    | 122  |
| TCGA_2_01_F5_670 | CMS_4        | primary | 71 | Male   | MSS   | YES NO | Left  | 25.69 | M1 | N1 | T3 | IV  | NO  | NO  | DECEASED | 0 | 452  | 0 | 452  |   | 1    | 368  |      |
| TCGA_1_01_F5_681 | CMS_4        | primary | 72 | Female | MSI_L |        | Left  | 32.32 | M0 | N0 | T3 | II  |     | NO  | LIVING   | 0 | 979  | 0 | 979  | 0 | 979  | 0    | 979  |
| TCGA_2_01_F5_681 | CMS_4        | primary | 67 | Male   | MSS   |        | Left  | 25.46 | M0 | N0 | T3 | II  | NO  | NO  | LIVING   | 0 | 1110 | 0 | 1110 | 0 | 1110 | 0    | 1110 |
| TCGA_3_01_F5_681 | CMS_2        | primary | 70 | Male   | MSS   | NO NO  | Left  | 28.08 | M0 | N2 | T4 | III | NO  | NO  | DECEASED | 1 | 598  | 1 | 598  |   | 1    | 65   |      |
| TCGA_4_01_F5_681 | Undetermined | primary | 57 | Male   | MSS   |        | Left  | 19.92 | M0 | N0 | T3 | II  | NO  | NO  | LIVING   | 0 | 1131 | 0 | 1131 | 0 | 1131 | 0    | 1131 |
| TCGA_1_01_F5_686 | CMS_2        | primary | 60 | Female | MSS   |        | Left  | 24.39 | M0 | N0 | T3 | II  | NO  | NO  | LIVING   | 0 | 1160 | 0 | 1160 | 0 | 1160 | 0    | 1160 |
| TCGA_3_01_F5_686 | CMS_2        | primary | 71 | Female | MSI_L | YES NO | Left  | 27.94 | M0 | N1 | T4 | III | NO  | NO  | DECEASED | 1 | 361  | 1 | 361  |   | 1    | 191  |      |
| TCGA_4_01_F5_686 | CMS_4        | primary | 74 | Female | MSI_L |        | Left  | 31.64 | M0 | N2 | T3 | III | NO  | NO  | LIVING   | 0 | 379  | 0 | 379  | 0 | 379  | 0    | 379  |
| TCGA_93_01_G4_62 | CMS_2        | primary | 49 | Female | MSI_L |        | Right | 28.67 | M0 | N1 | T3 | III | NO  | NO  | LIVING   | 0 | 4051 | 0 | 4051 | 0 | 4051 | 0    | 4051 |
| TCGA_94_01_G4_62 | CMS_2        | primary | 75 | Male   | MSS   | YES NO | Right |       | M1 | N1 | T3 | IV  | NO  | NO  | DECEASED | 1 | 858  | 1 | 858  |   | 1    | 517  |      |
| TCGA_95_01_G4_62 | CMS_2        | primary | 70 | Female | MSI_L |        | Right |       | M0 | N0 | T3 | II  | NO  | NO  | LIVING   | 0 | 254  | 0 | 254  |   | 0    | 254  |      |
| TCGA_97_01_G4_62 | CMS_4        | primary | 55 | Female | MSS   | YES NO | Right |       | M1 | N2 | T3 | IV  | YES | YES | LIVING   | 0 | 2506 | 0 | 2506 |   | 1    | 439  |      |
| TCGA_98_01_G4_62 | CMS_2        | primary | 90 | Male   | MSI_L | YES NO | Right |       | MX | N1 | T4 | III | YES | NO  | DECEASED | 1 | 715  | 1 | 715  |   | 1    | 291  |      |
| TCGA_99_01_G4_62 | CMS_1        | primary | 69 | Male   | MSS   |        | Left  | 52.07 | M0 | N2 | T3 | III | NO  | YES | LIVING   | 0 | 2268 | 0 | 2268 |   | 0    | 2268 |      |

|                  |              |         |    |        |       |     |       |       |       |    |    |     |     |     |      |          |          |      |      |      |      |      |      |   |      |
|------------------|--------------|---------|----|--------|-------|-----|-------|-------|-------|----|----|-----|-----|-----|------|----------|----------|------|------|------|------|------|------|---|------|
| TCGA_G4_63_02_01 | CMS_4        | primary | 90 | Female | MSI_H |     | Right | 24.51 | M0    | N0 | T3 | II  | YES |     | YES  | DECEASED | 1        | 2047 | 0    | 2047 | 0    | 2047 |      |   |      |
| TCGA_G4_63_03_01 | CMS_2        | primary | 54 | Female | MSI_L | YES | NO    | Left  |       | M1 | N1 | T3  | IV  | NO  | 3.8  | YES      | DECEASED | 1    | 2003 | 1    | 2003 | 1    | 872  |   |      |
| TCGA_G4_63_04_01 | CMS_2        | primary | 66 | Female | MSI_H | YES | YES   | Right |       | M0 | N0 | T4  | II  | NO  | 4.4  | NO       | LIVING   | 0    | 1631 | 0    | 1631 | 1    | 859  |   |      |
| TCGA_G4_63_06_01 | CMS_2        | primary | 71 | Male   | MSS   |     |       | Right | 38.06 | M0 | N0 | T2  |     | NO  | 2.7  |          | LIVING   | 0    | 1359 | 0    | 1359 | 0    | 1359 |   |      |
| TCGA_G4_63_07_01 | CMS_2        | primary | 37 | Female | MSS   |     |       | Left  | 25.77 | M0 | N1 | T3  | III | NO  | 10.2 | YES      | LIVING   | 0    | 1674 | 0    | 1674 | 0    | 1674 |   |      |
| TCGA_G4_63_09_01 | Undetermined | primary | 40 | Female | MSI_H | YES | YES   | Left  | 21.11 | M0 | N1 | T3  | III | NO  |      | NO       | LIVING   | 0    | 2600 | 0    | 2600 | 1    | 2176 | 1 | 2176 |
| TCGA_G4_63_10_01 | CMS_4        | primary | 69 | Male   | MSS   |     |       | Right | 34.25 | M0 | N1 | T3  | III | NO  |      | NO       | LIVING   | 0    | 1935 | 0    | 1935 | 0    | 1935 | 0 | 1935 |
| TCGA_G4_63_11_01 | CMS_2        | primary | 80 | Male   | MSS   |     |       | Right | 23.22 | MX | N1 | T3  | III | YES | 0.9  | YES      | LIVING   | 0    | 1199 | 0    | 1199 | 0    | 1199 |   |      |
| TCGA_G4_63_14_01 | CMS_4        | primary | 76 | Female | MSS   | YES | YES   | Right | 33.48 | M1 | N2 | T3  | IV  | NO  |      | YES      | LIVING   | 0    | 1093 | 0    | 1093 | 1    | 38   |   |      |
| TCGA_G4_63_15_01 | CMS_2        | primary | 66 | Male   | MSS   |     |       | Left  | 20.07 | M1 | N1 | T3  | IV  | YES | 43.4 | NO       | LIVING   | 0    | 1883 | 0    | 1883 | 0    | 1883 |   |      |
| TCGA_G4_63_17_01 | CMS_2        | primary | 51 | Female | MSI_L | NO  | NO    | Left  | 36.31 | MX | N2 | T3  | III | NO  |      |          | LIVING   | 0    | 1095 | 0    | 1095 | 1    | 592  |   |      |
| TCGA_G4_63_20_01 | CMS_3        | primary | 73 | Male   | MSI_H |     |       | Right | 37.50 | MX | N1 | T3  | III | NO  | 2.7  | YES      | LIVING   | 0    | 804  | 0    | 804  | 0    | 804  |   |      |
| TCGA_G4_63_21_01 | CMS_3        | primary | 60 | Female | MSI_L |     |       | Right | 31.49 | MX | N1 | T2  | III | NO  | 3.4  | NO       | LIVING   | 0    | 672  | 0    | 672  | 0    | 672  |   |      |
| TCGA_G4_63_22_01 | CMS_3        | primary | 65 | Male   | MSI_L | NO  | NO    | Left  | 27.44 | MX | N1 | T3  | III | NO  | 4.2  | YES      | LIVING   | 0    | 792  | 0    | 792  | 1    | 789  |   |      |
| TCGA_G4_63_23_01 | CMS_3        | primary | 50 | Male   | MSS   |     |       | Right | 30.06 | MX | N0 | Tis | I   | NO  | 0.9  | NO       | LIVING   | 0    | 419  | 0    | 419  | 0    | 419  |   |      |
| TCGA_G4_65_86_01 | CMS_1        | primary | 73 | Female | MSI_H |     |       | Right | 27.32 | M0 | N0 | T3  | II  | NO  |      | YES      | LIVING   | 0    | 1089 | 0    | 1089 | 0    | 1089 |   |      |



|                  |              |         |    |        |       |     |       |       |       |    |    |     |     |      |     |          |          |      |      |      |      |      |      |      |
|------------------|--------------|---------|----|--------|-------|-----|-------|-------|-------|----|----|-----|-----|------|-----|----------|----------|------|------|------|------|------|------|------|
| TCGA_G4_65_88_01 | CMS_1        | primary | 58 | Female | MSI_H |     | Right | 20.69 | M0    | N0 | T3 | II  | NO  | 2.8  | NO  | LIVING   | 0        | 796  | 0    | 796  | 0    | 796  |      |      |
| TCGA_G4_66_25_01 | CMS_2        | primary | 77 | Female | MSS   | NO  | YES   | Left  | 29.50 | M0 | N0 | T3  | II  | NO   | 5.5 | NO       | LIVING   | 0    | 2792 | 0    | 2792 | 1    | 2564 |      |
| TCGA_G4_66_26_01 | CMS_2        | primary | 90 | Male   | MSS   |     | Right |       | M0    | N0 | T3 | II  | NO  |      | NO  | DECEASED | 1        | 1422 | 0    | 1422 | 0    | 1422 |      |      |
| TCGA_G4_66_27_01 | Undetermined | primary | 84 | Male   | MSI_L | YES | Right | 25.83 | M0    | N0 | T3 | II  | NO  | 1.8  | NO  | LIVING   | 0        | 2275 | 0    | 2275 | 1    | 1003 | 1    | 1003 |
| TCGA_G4_66_28_01 | CMS_1        | primary | 78 | Male   | MSI_H |     | Right | 31.86 | M0    | N0 | T2 | I   | NO  | 2.1  | NO  | LIVING   | 0        | 2424 | 0    | 2424 | 0    | 2424 | 0    | 2424 |
| TCGA_G5_62_33_01 | Undetermined | primary | 74 | Male   | MSI_L | YES | NO    | Left  | 31.22 | M0 | N2 | T3  |     | YES  | 0.5 | YES      | DECEASED | 1    | 556  | 1    | 556  | 1    | 92   |      |
| TCGA_G5_62_35_01 | CMS_2        | primary | 72 | Male   | MSS   | NO  | YES   | Left  | 27.17 | MX | N1 | T3  | III | NO   | 1.7 | NO       | LIVING   | 0    | 1696 | 0    | 1696 | 1    | 1042 |      |
| TCGA_G5_65_72_01 | CMS_2        | primary | 56 | Male   | MSS   |     | Left  | 40.73 |       |    |    |     | NO  | 1.7  | NO  | DECEASED | 1        | 1432 | 0    | 1432 | 0    | 1432 |      |      |
| TCGA_G5_66_41_01 | CMS_3        | primary | 67 | Male   | MSS   |     | Left  | 33.10 | MX    | N1 | T1 | III | NO  |      | NO  | LIVING   | 0        | 804  | 0    | 804  | 0    | 804  |      |      |
| TCGA_NH_A5_0T_01 | CMS_2        | primary | 68 | Female | MSS   |     | Left  | 28.70 | MX    | N0 | T3 | II  | NO  | 1.4  | NO  | LIVING   | 0        | 553  | 0    | 553  | 0    | 553  | 0    | 553  |
| TCGA_NH_A5_0U_01 | Undetermined | primary | 42 | Male   | MSS   |     | Right | 29.67 | M1    | N0 | T4 | IV  | YES |      | NO  | DECEASED | 1        | 334  | 1    | 334  | 1    | 276  |      |      |
| TCGA_NH_A5_0V_01 | Undetermined | primary | 69 | Male   | MSI_L |     | Right | 23.46 | M0    | N2 | T3 | III | NO  |      | NO  | LIVING   | 0        | 588  | 0    | 588  | 0    | 588  | 0    | 588  |
| TCGA_NH_A5_1V_01 | CMS_1        | primary | 90 | Female | MSI_H |     | Right | 19.70 | MX    | N0 | T3 | II  | NO  | 11.8 | NO  | LIVING   | 0        | 588  | 0    | 588  | 0    | 588  | 0    | 588  |
| TCGA_NH_A6_0A_01 | Undetermined | primary | 58 | Male   | MSS   | NO  | NO    | Right | 34.80 | MX | N2 | T4  | III | NO   |     | YES      | DECEASED | 1    | 302  | 1    | 302  | 1    | 6    |      |
| TCGA_NH_A6_0B_01 | CMS_2        | primary | 71 | Female | MSS   |     | Right | 29.55 | MX    | N2 | T3 | III | NO  |      | NO  | LIVING   | 0        | 476  | 0    | 476  | 0    | 476  |      |      |
| TCGA_NH_A6_0C_01 | CMS_3        | primary | 66 | Female | MSS   |     | Left  | 39.25 | M1    | N1 | T4 | IV  | NO  |      | NO  | LIVING   | 0        | 389  | 0    | 389  | 0    | 389  |      |      |

|                  |              |         |    |        |       |        |       |       |    |    |    |     |     |       |     |          |   |      |   |      |   |      |
|------------------|--------------|---------|----|--------|-------|--------|-------|-------|----|----|----|-----|-----|-------|-----|----------|---|------|---|------|---|------|
| TCGA_NH_A8_F7_01 | CMS_2        | primary | 53 | Female |       |        | Left  | 21.15 | MX | N0 | T3 | II  | NO  | 100.3 | NO  | LIVING   | 0 | 543  | 0 | 543  | 0 | 543  |
| TCGA_NH_A8_F8_01 | CMS_2        | primary | 79 | Male   | MSS   |        | Right | 24.81 | M1 | N2 | T4 | IV  | NO  | 24.9  | YES | DECEASED | 1 | 511  | 1 | 511  | 1 | 511  |
| TCGA_QG_A5_YV_01 | CMS_2        | primary | 64 | Female | MSS   |        | Left  | 36.50 | MX | N1 | T4 | III | NO  | 15.04 | NO  | LIVING   | 0 | 1301 | 0 | 1301 | 0 | 1301 |
| TCGA_QG_A5_YW_01 | Undetermined | primary | 55 | Female | MSI_L |        | Right | 29.19 | MX | N2 | T3 | III | NO  | 11.37 | NO  | LIVING   | 0 | 896  | 0 | 896  | 0 | 896  |
| TCGA_QG_A5_YX_01 | CMS_2        | primary | 61 | Female | MSI_L |        | Left  | 25.78 | MX | N0 | T3 | II  | NO  | 2.04  | YES | LIVING   | 0 | 1003 | 0 | 1003 | 0 | 1003 |
| TCGA_QG_A5_Z1_01 | CMS_2        | primary | 71 | Male   | MSI_L |        | Left  |       | MX | N1 | T3 | III | YES | 5.3   | YES | DECEASED | 1 | 256  | 0 | 256  | 0 | 256  |
| TCGA_QG_A5_Z2_01 | CMS_3        | primary | 61 | Male   | MSI_H |        | Right | 29.11 | M0 | N0 | T2 | I   | NO  | 1.52  | NO  | LIVING   | 0 | 952  | 0 | 952  | 0 | 952  |
| TCGA_QL_A9_7D_01 | CMS_2        | primary | 84 | Female | MSS   |        | Right |       | MX | N0 | T2 | I   |     |       |     | LIVING   | 0 | 666  | 0 | 666  | 0 | 666  |
| TCGA_RU_A8_FL_01 | CMS_2        | primary | 51 | Male   | MSS   | YES NO | Right | 35.38 | MX | N2 | T3 | III |     | 24.6  |     | LIVING   | 0 | 1177 | 0 | 1177 | 1 | 256  |
| TCGA_SS_A7_HO_01 | CMS_2        | primary | 44 | Female | MSS   | NO NO  | Right | 34.96 | M0 | N0 | T4 | II  | NO  | 0     | YES | LIVING   | 0 | 1829 | 0 | 1829 | 1 | 506  |
| TCGA_T9_A92_H_01 | CMS_2        | primary | 82 | Male   | MSS   |        | Left  | 19.72 | M0 | N0 | T3 | II  | YES |       | NO  | LIVING   | 0 | 362  | 0 | 362  | 1 | 81   |
| TCGA_WS_AB_45_01 | Undetermined | primary | 52 | Female | MSI_H |        | Right | 14.72 | MX | N0 | T3 | II  | NO  |       | NO  | LIVING   | 0 | 2130 | 0 | 2130 | 0 | 2130 |

**Supplementary Table 5. Data of metastases from GEO datasets.**

| <b>sample_ID</b> | <b>SSP.CMS</b> | <b>patient_id</b> | <b>tumor_site</b> | <b>batch</b> |
|------------------|----------------|-------------------|-------------------|--------------|
| GSM653243        | CMS3           | patient 1-1       | lymphnode         | GSE26571     |
| GSM653244        | CMS3           | patient 1-2       | lymphnode         | GSE26571     |
| GSM653245        | CMS3           | patient 3         | lymphnode         | GSE26571     |
| GSM653246        | CMS2           | patient 4         | lymphnode         | GSE26571     |
| GSM653247        | CMS3           | patient 5         | lymphnode         | GSE26571     |
| GSM653248        | CMS3           | patient 6-1       | lymphnode         | GSE26571     |
| GSM653249        | CMS3           | patient 6-2       | lymphnode         | GSE26571     |
| GSM653250        | CMS2           | patient 7         | lymphnode         | GSE26571     |
| GSM653251        | CMS4           | patient 8         | lymphnode         | GSE26571     |
| GSM653252        | CMS3           | patient 9         | liver             | GSE26571     |
| GSM653253        | CMS3           | patient 10        | liver             | GSE26571     |
| GSM1672975       | CMS2           | Patient_190       | liver             | GSE68468     |
| GSM1672980       | CMS4           | Patient_163       | liver             | GSE68468     |
| GSM1672982       | CMS4           | Patient_135       | liver             | GSE68468     |
| GSM1672988       | CMS2           | Patient_041       | lung              | GSE68468     |
| GSM1672990       | CMS2           | Patient_122       | lung              | GSE68468     |
| GSM1673005       | CMS2           | Patient_187       | liver             | GSE68468     |
| GSM1673019       | CMS4           | Patient_139       | liver             | GSE68468     |
| GSM1673020       | CMS2           | Patient_002       | liver             | GSE68468     |
| GSM1673021       | CMS2           | Patient_002       | liver             | GSE68468     |
| GSM1673022       | CMS2           | Patient_002       | liver             | GSE68468     |
| GSM1673038       | CMS4           | Patient_120       | lung              | GSE68468     |
| GSM1673040       | CMS2           | Patient_110       | lung              | GSE68468     |
| GSM1673041       | CMS4           | Patient_028       | lung              | GSE68468     |
| GSM1673043       | CMS3           | Patient_217       | liver             | GSE68468     |
| GSM1673051       | CMS4           | Patient_274       | liver             | GSE68468     |
| GSM1673061       | CMS3           | Patient_008       | liver             | GSE68468     |
| GSM1673075       | CMS2           | Patient_003       | liver             | GSE68468     |
| GSM1673083       | CMS2           | Patient_134       | liver             | GSE68468     |
| GSM1673085       | CMS4           | Patient_267       | liver             | GSE68468     |
| GSM1673088       | CMS4           | Patient_189       | liver             | GSE68468     |
| GSM1673089       | CMS4           | Patient_127       | lung              | GSE68468     |
| GSM1673091       | CMS2           | Patient_176       | liver             | GSE68468     |
| GSM1673092       | CMS3           | Patient_044       | lung              | GSE68468     |
| GSM1673095       | CMS4           | Patient_156       | liver             | GSE68468     |
| GSM1673096       | CMS4           | Patient_078       | lung              | GSE68468     |
| GSM1673102       | CMS2           | Patient_152       | liver             | GSE68468     |
| GSM1673112       | CMS4           | Patient_273       | liver             | GSE68468     |
| GSM1673124       | CMS2           | Patient_118       | lung              | GSE68468     |
| GSM1673129       | CMS2           | Patient_221       | liver             | GSE68468     |
| GSM1673134       | CMS2           | Patient_006       | liver             | GSE68468     |
| GSM1673135       | CMS2           | Patient_006       | liver             | GSE68468     |
| GSM1673136       | CMS2           | Patient_006       | liver             | GSE68468     |
| GSM1673145       | CMS2           | Patient_192       | liver             | GSE68468     |
| GSM1673159       | CMS1           | Patient_150       | liver             | GSE68468     |

|            |      |             |       |           |
|------------|------|-------------|-------|-----------|
| GSM1673166 | CMS2 | Patient_004 | liver | GSE68468  |
| GSM1673167 | CMS2 | Patient_004 | liver | GSE68468  |
| GSM1673168 | CMS2 | Patient_004 | liver | GSE68468  |
| GSM1673169 | CMS4 | Patient_115 | lung  | GSE68468  |
| GSM1673193 | CMS4 | Patient_015 | lung  | GSE68468  |
| GSM1673196 | CMS4 | Patient_007 | liver | GSE68468  |
| GSM1673197 | CMS4 | Patient_007 | liver | GSE68468  |
| GSM1673198 | CMS4 | Patient_007 | liver | GSE68468  |
| GSM1673202 | CMS4 | Patient_162 | liver | GSE68468  |
| GSM1673217 | CMS2 | Patient_270 | liver | GSE68468  |
| GSM1673224 | CMS2 | Patient_173 | liver | GSE68468  |
| GSM1673225 | CMS2 | Patient_252 | liver | GSE68468  |
| GSM1673234 | CMS2 | Patient_160 | liver | GSE68468  |
| GSM1673235 | CMS4 | Patient_131 | lung  | GSE68468  |
| GSM1673236 | CMS4 | Patient_131 | lung  | GSE68468  |
| GSM1673237 | CMS4 | Patient_214 | liver | GSE68468  |
| GSM1673244 | CMS2 | Patient_191 | liver | GSE68468  |
| GSM1673246 | CMS4 | Patient_091 | lung  | GSE68468  |
| GSM1673255 | CMS4 | Patient_269 | liver | GSE68468  |
| GSM1673266 | CMS2 | Patient_216 | liver | GSE68468  |
| GSM1673267 | CMS4 | Patient_116 | lung  | GSE68468  |
| GSM1673268 | CMS4 | Patient_067 | lung  | GSE68468  |
| GSM1673272 | CMS2 | Patient_193 | liver | GSE68468  |
| GSM1673273 | CMS4 | Patient_104 | liver | GSE68468  |
| GSM1673282 | CMS4 | Patient_254 | liver | GSE68468  |
| GSM1673292 | CMS4 | Patient_212 | liver | GSE68468  |
| GSM1673306 | CMS4 | Patient_013 | lung  | GSE68468  |
| GSM1673310 | CMS4 | Patient_132 | lung  | GSE68468  |
| GSM1673320 | CMS4 | Patient_071 | lung  | GSE68468  |
| GSM1673326 | CMS4 | Patient_155 | liver | GSE68468  |
| GSM1673334 | CMS4 | Patient_062 | lung  | GSE68468  |
| GSM1673344 | CMS2 | Patient_011 | liver | GSE68468  |
| GSM1673347 | CMS4 | Patient_141 | liver | GSE68468  |
| GSM3776212 | CMS4 |             | liver | GSE131418 |
| GSM3776213 | CMS2 |             | liver | GSE131418 |
| GSM3776214 | CMS4 |             | liver | GSE131418 |
| GSM3776215 | CMS2 |             | liver | GSE131418 |
| GSM3776216 | CMS2 |             | liver | GSE131418 |
| GSM3776217 | CMS2 |             | liver | GSE131418 |
| GSM3776218 | CMS2 |             | liver | GSE131418 |
| GSM3776219 | CMS4 |             | liver | GSE131418 |
| GSM3776220 | CMS2 |             | liver | GSE131418 |
| GSM3776221 | CMS2 |             | liver | GSE131418 |
| GSM3776222 | CMS4 |             | liver | GSE131418 |
| GSM3776223 | CMS2 |             | liver | GSE131418 |
| GSM3776224 | CMS2 |             | liver | GSE131418 |
| GSM3776225 | CMS1 |             | liver | GSE131418 |
| GSM3776226 | CMS4 |             | lung  | GSE131418 |

|            |      |       |           |
|------------|------|-------|-----------|
| GSM3776227 | CMS2 | liver | GSE131418 |
| GSM3776228 | CMS2 | liver | GSE131418 |
| GSM3776229 | CMS4 | liver | GSE131418 |
| GSM3776230 | CMS2 | lung  | GSE131418 |
| GSM3776231 | CMS1 | liver | GSE131418 |
| GSM3776232 | CMS1 | liver | GSE131418 |
| GSM3776233 | CMS2 | liver | GSE131418 |
| GSM3776234 | CMS4 | liver | GSE131418 |
| GSM3776235 | CMS2 | liver | GSE131418 |
| GSM3776236 | CMS1 | liver | GSE131418 |
| GSM3776237 | CMS4 | liver | GSE131418 |
| GSM3776238 | CMS2 | liver | GSE131418 |
| GSM3776239 | CMS4 | lung  | GSE131418 |
| GSM3776240 | CMS4 | liver | GSE131418 |
| GSM3776241 | CMS2 | liver | GSE131418 |
| GSM3776242 | CMS4 | liver | GSE131418 |
| GSM3776243 | CMS4 | lung  | GSE131418 |
| GSM3776244 | CMS2 | liver | GSE131418 |
| GSM3776245 | CMS2 | liver | GSE131418 |
| GSM3776246 | CMS1 | liver | GSE131418 |
| GSM3776247 | CMS4 | liver | GSE131418 |
| GSM3776248 | CMS2 | liver | GSE131418 |
| GSM3776249 | CMS2 | liver | GSE131418 |
| GSM3776250 | CMS2 | liver | GSE131418 |
| GSM3776251 | CMS2 | liver | GSE131418 |
| GSM3776252 | CMS2 | lung  | GSE131418 |
| GSM3776253 | CMS4 | liver | GSE131418 |
| GSM3776254 | CMS4 | lung  | GSE131418 |
| GSM3776255 | CMS1 | liver | GSE131418 |
| GSM3776256 | CMS4 | liver | GSE131418 |
| GSM3776257 | CMS4 | liver | GSE131418 |
| GSM3776258 | CMS4 | lung  | GSE131418 |
| GSM3776259 | CMS4 | liver | GSE131418 |
| GSM3776260 | CMS4 | lung  | GSE131418 |
| GSM3776261 | CMS4 | liver | GSE131418 |
| GSM3776262 | CMS4 | liver | GSE131418 |
| GSM3776263 | CMS4 | liver | GSE131418 |
| GSM3776264 | CMS2 | lung  | GSE131418 |
| GSM3776265 | CMS2 | lung  | GSE131418 |
| GSM3776266 | CMS2 | liver | GSE131418 |
| GSM3776267 | CMS4 | liver | GSE131418 |
| GSM3776268 | CMS4 | liver | GSE131418 |
| GSM3776269 | CMS4 | liver | GSE131418 |
| GSM3776270 | CMS2 | liver | GSE131418 |
| GSM3776271 | CMS4 | liver | GSE131418 |
| GSM3776272 | CMS4 | liver | GSE131418 |
| GSM3776273 | CMS2 | lung  | GSE131418 |
| GSM3776274 | CMS4 | liver | GSE131418 |

|            |      |       |           |
|------------|------|-------|-----------|
| GSM3776275 | CMS4 | lung  | GSE131418 |
| GSM3776276 | CMS2 | liver | GSE131418 |
| GSM3776277 | CMS4 | liver | GSE131418 |
| GSM3776278 | CMS4 | liver | GSE131418 |
| GSM3776279 | CMS4 | liver | GSE131418 |
| GSM3776280 | CMS4 | liver | GSE131418 |
| GSM3776281 | CMS4 | liver | GSE131418 |
| GSM3776282 | CMS2 | liver | GSE131418 |
| GSM3776283 | CMS4 | liver | GSE131418 |
| GSM3776284 | CMS2 | liver | GSE131418 |
| GSM3776285 | CMS4 | liver | GSE131418 |
| GSM3776286 | CMS2 | liver | GSE131418 |
| GSM3776287 | CMS4 | liver | GSE131418 |
| GSM3776288 | CMS4 | liver | GSE131418 |
| GSM3776289 | CMS2 | liver | GSE131418 |
| GSM3776290 | CMS4 | liver | GSE131418 |
| GSM3776291 | CMS4 | lung  | GSE131418 |
| GSM3776292 | CMS4 | lung  | GSE131418 |
| GSM3776293 | CMS2 | liver | GSE131418 |
| GSM3776294 | CMS2 | lung  | GSE131418 |
| GSM3776295 | CMS1 | liver | GSE131418 |
| GSM3776296 | CMS4 | liver | GSE131418 |
| GSM3776297 | CMS4 | liver | GSE131418 |
| GSM3776298 | CMS4 | liver | GSE131418 |
| GSM3776299 | CMS2 | liver | GSE131418 |
| GSM3776300 | CMS2 | lung  | GSE131418 |
| GSM3776301 | CMS4 | lung  | GSE131418 |
| GSM3776302 | CMS2 | liver | GSE131418 |
| GSM3776303 | CMS2 | liver | GSE131418 |
| GSM3776304 | CMS4 | liver | GSE131418 |
| GSM3776305 | CMS4 | liver | GSE131418 |
| GSM3776306 | CMS4 | liver | GSE131418 |
| GSM3776307 | CMS2 | liver | GSE131418 |
| GSM3776308 | CMS2 | liver | GSE131418 |
| GSM3776309 | CMS2 | lung  | GSE131418 |
| GSM3776310 | CMS2 | liver | GSE131418 |
| GSM3776311 | CMS4 | liver | GSE131418 |
| GSM3776312 | CMS4 | liver | GSE131418 |
| GSM3776313 | CMS2 | liver | GSE131418 |
| GSM3776314 | CMS2 | lung  | GSE131418 |
| GSM3776315 | CMS2 | liver | GSE131418 |
| GSM3776316 | CMS2 | lung  | GSE131418 |
| GSM3776317 | CMS4 | liver | GSE131418 |
| GSM3776318 | CMS4 | liver | GSE131418 |
| GSM3776319 | CMS2 | liver | GSE131418 |
| GSM3776320 | CMS4 | liver | GSE131418 |
| GSM3776321 | CMS4 | lung  | GSE131418 |
| GSM3776322 | CMS1 | liver | GSE131418 |

|            |      |       |           |
|------------|------|-------|-----------|
| GSM3776323 | CMS4 | liver | GSE131418 |
| GSM3776324 | CMS2 | liver | GSE131418 |
| GSM3776325 | CMS4 | liver | GSE131418 |
| GSM3776326 | CMS1 | liver | GSE131418 |
| GSM3776327 | CMS4 | liver | GSE131418 |
| GSM3776328 | CMS2 | liver | GSE131418 |
| GSM3776329 | CMS4 | lung  | GSE131418 |
| GSM3776330 | CMS4 | liver | GSE131418 |
| GSM3776331 | CMS2 | liver | GSE131418 |
| GSM3776332 | CMS4 | liver | GSE131418 |
| GSM3776333 | CMS4 | liver | GSE131418 |
| GSM3776334 | CMS4 | liver | GSE131418 |
| GSM3776335 | CMS4 | lung  | GSE131418 |
| GSM3776336 | CMS2 | liver | GSE131418 |
| GSM3776337 | CMS2 | lung  | GSE131418 |
| GSM3776338 | CMS2 | liver | GSE131418 |
| GSM3776339 | CMS4 | lung  | GSE131418 |
| GSM3776340 | CMS2 | liver | GSE131418 |
| GSM3776341 | CMS4 | lung  | GSE131418 |
| GSM3776342 | CMS2 | lung  | GSE131418 |
| GSM3776343 | CMS4 | lung  | GSE131418 |
| GSM3776344 | CMS4 | lung  | GSE131418 |
| GSM3776345 | CMS4 | lung  | GSE131418 |
| GSM3776346 | CMS2 | liver | GSE131418 |
| GSM3776347 | CMS2 | liver | GSE131418 |
| GSM3776348 | CMS4 | lung  | GSE131418 |
| GSM3776349 | CMS2 | liver | GSE131418 |
| GSM3776350 | CMS2 | liver | GSE131418 |
| GSM3776351 | CMS4 | lung  | GSE131418 |
| GSM3776352 | CMS4 | liver | GSE131418 |
| GSM3776353 | CMS2 | lung  | GSE131418 |
| GSM3776354 | CMS2 | lung  | GSE131418 |
| GSM3776355 | CMS4 | liver | GSE131418 |
| GSM3776356 | CMS4 | liver | GSE131418 |
| GSM3776357 | CMS2 | liver | GSE131418 |
| GSM3776358 | CMS4 | liver | GSE131418 |
| GSM3776359 | CMS2 | liver | GSE131418 |
| GSM3776360 | CMS4 | lung  | GSE131418 |
| GSM3776361 | CMS4 | lung  | GSE131418 |
| GSM3776362 | CMS4 | liver | GSE131418 |
| GSM3776363 | CMS2 | liver | GSE131418 |
| GSM3776364 | CMS2 | lung  | GSE131418 |
| GSM3776365 | CMS4 | liver | GSE131418 |
| GSM3776366 | CMS2 | liver | GSE131418 |
| GSM3776367 | CMS4 | liver | GSE131418 |
| GSM3776368 | CMS2 | lung  | GSE131418 |
| GSM3776369 | CMS4 | lung  | GSE131418 |
| GSM3776370 | CMS4 | liver | GSE131418 |

|            |      |       |           |
|------------|------|-------|-----------|
| GSM3776371 | CMS4 | lung  | GSE131418 |
| GSM3776372 | CMS2 | lung  | GSE131418 |
| GSM3776373 | CMS4 | liver | GSE131418 |
| GSM3776374 | CMS4 | liver | GSE131418 |
| GSM3776375 | CMS4 | liver | GSE131418 |
| GSM3776376 | CMS4 | liver | GSE131418 |
| GSM3776377 | CMS4 | liver | GSE131418 |
| GSM3776378 | CMS4 | liver | GSE131418 |
| GSM3776379 | CMS2 | liver | GSE131418 |
| GSM3776380 | CMS4 | liver | GSE131418 |
| GSM3776381 | CMS4 | liver | GSE131418 |
| GSM3776382 | CMS4 | liver | GSE131418 |
| GSM3776383 | CMS4 | liver | GSE131418 |
| GSM3776384 | CMS4 | lung  | GSE131418 |
| GSM3776385 | CMS4 | liver | GSE131418 |
| GSM3776386 | CMS2 | liver | GSE131418 |
| GSM3776387 | CMS2 | liver | GSE131418 |
| GSM3776388 | CMS2 | liver | GSE131418 |
| GSM3776389 | CMS2 | liver | GSE131418 |
| GSM3776390 | CMS4 | liver | GSE131418 |
| GSM3776391 | CMS2 | liver | GSE131418 |
| GSM3776392 | CMS4 | lung  | GSE131418 |
| GSM3776393 | CMS2 | liver | GSE131418 |
| GSM3776394 | CMS4 | liver | GSE131418 |
| GSM3776395 | CMS2 | liver | GSE131418 |
| GSM3776944 | CMS2 | liver | GSE131418 |
| GSM3776945 | CMS4 | lung  | GSE131418 |
| GSM3776946 | CMS2 | liver | GSE131418 |
| GSM3776947 | CMS4 | liver | GSE131418 |
| GSM3776948 | CMS2 | liver | GSE131418 |
| GSM3776949 | CMS4 | liver | GSE131418 |
| GSM3776950 | CMS4 | liver | GSE131418 |
| GSM3776951 | CMS4 | liver | GSE131418 |
| GSM3776952 | CMS4 | liver | GSE131418 |
| GSM3776953 | CMS4 | liver | GSE131418 |
| GSM3776954 | CMS4 | liver | GSE131418 |
| GSM3776955 | CMS2 | liver | GSE131418 |
| GSM3776956 | CMS2 | liver | GSE131418 |
| GSM3776957 | CMS4 | liver | GSE131418 |
| GSM3776958 | CMS4 | liver | GSE131418 |
| GSM3776959 | CMS2 | liver | GSE131418 |
| GSM3776960 | CMS2 | liver | GSE131418 |
| GSM3776961 | CMS2 | liver | GSE131418 |
| GSM3776962 | CMS4 | lung  | GSE131418 |
| GSM3776963 | CMS4 | lung  | GSE131418 |
| GSM3776964 | CMS4 | liver | GSE131418 |
| GSM3776965 | CMS4 | liver | GSE131418 |
| GSM3776966 | CMS4 | liver | GSE131418 |



|            |      |       |           |
|------------|------|-------|-----------|
| GSM3776967 | CMS4 | lung  | GSE131418 |
| GSM3776968 | CMS4 | liver | GSE131418 |
| GSM3776969 | CMS4 | liver | GSE131418 |
| GSM3776970 | CMS4 | liver | GSE131418 |
| GSM3776971 | CMS4 | liver | GSE131418 |
| GSM3776972 | CMS2 | liver | GSE131418 |
| GSM3776973 | CMS2 | liver | GSE131418 |
| GSM3776974 | CMS4 | liver | GSE131418 |
| GSM3776975 | CMS2 | lung  | GSE131418 |
| GSM3776976 | CMS2 | lung  | GSE131418 |
| GSM3776977 | CMS2 | liver | GSE131418 |
| GSM3776978 | CMS4 | liver | GSE131418 |
| GSM3776979 | CMS2 | liver | GSE131418 |
| GSM3776980 | CMS4 | liver | GSE131418 |
| GSM3776981 | CMS4 | liver | GSE131418 |
| GSM3776982 | CMS2 | liver | GSE131418 |
| GSM3776983 | CMS4 | liver | GSE131418 |
| GSM3776984 | CMS2 | liver | GSE131418 |
| GSM3776985 | CMS4 | lung  | GSE131418 |
| GSM3776986 | CMS4 | lung  | GSE131418 |
| GSM3776987 | CMS2 | lung  | GSE131418 |
| GSM3776988 | CMS4 | lung  | GSE131418 |
| GSM3776989 | CMS2 | liver | GSE131418 |
| GSM3776990 | CMS4 | liver | GSE131418 |
| GSM3776991 | CMS4 | liver | GSE131418 |
| GSM3776992 | CMS2 | lung  | GSE131418 |
| GSM3776993 | CMS2 | liver | GSE131418 |
| GSM3776994 | CMS4 | lung  | GSE131418 |
| GSM3776995 | CMS2 | lung  | GSE131418 |
| GSM3776996 | CMS2 | lung  | GSE131418 |
| GSM3776997 | CMS4 | lung  | GSE131418 |
| GSM3776998 | CMS2 | liver | GSE131418 |
| GSM3776999 | CMS4 | liver | GSE131418 |
| GSM3777000 | CMS2 | liver | GSE131418 |
| GSM3777001 | CMS4 | liver | GSE131418 |
| GSM3777002 | CMS4 | liver | GSE131418 |
| GSM3777003 | CMS4 | lung  | GSE131418 |
| GSM3777004 | CMS2 | liver | GSE131418 |
| GSM3777005 | CMS2 | liver | GSE131418 |
| GSM3777006 | CMS4 | liver | GSE131418 |
| GSM3777007 | CMS1 | liver | GSE131418 |
| GSM3777008 | CMS2 | liver | GSE131418 |
| GSM3777009 | CMS4 | liver | GSE131418 |
| GSM3777010 | CMS2 | liver | GSE131418 |
| GSM3777011 | CMS2 | liver | GSE131418 |
| GSM3777012 | CMS2 | liver | GSE131418 |
| GSM3777013 | CMS2 | liver | GSE131418 |
| GSM3777014 | CMS2 | liver | GSE131418 |

|            |      |         |            |           |
|------------|------|---------|------------|-----------|
| GSM3777015 | CMS2 |         | lung       | GSE131418 |
| GSM3777016 | CMS2 |         | liver      | GSE131418 |
| GSM4451134 | CMS2 |         | peritoneum | GSE147971 |
| GSM4451135 | CMS4 |         | peritoneum | GSE147971 |
| GSM4451136 | CMS4 |         | peritoneum | GSE147971 |
| GSM4451137 | CMS4 |         | peritoneum | GSE147971 |
| GSM4451138 | CMS4 |         | peritoneum | GSE147971 |
| GSM4451140 | CMS4 |         | peritoneum | GSE147971 |
| GSM4451142 | CMS4 |         | peritoneum | GSE147971 |
| GSM4451143 | CMS4 |         | peritoneum | GSE147971 |
| GSM4451144 | CMS4 |         | peritoneum | GSE147971 |
| GSM4451145 | CMS4 |         | peritoneum | GSE147971 |
| GSM4451147 | CMS4 |         | peritoneum | GSE147971 |
| GSM4451148 | CMS4 |         | peritoneum | GSE147971 |
| GSM4451149 | CMS1 |         | peritoneum | GSE147971 |
| GSM4451150 | CMS4 |         | peritoneum | GSE147971 |
| GSM1019390 | CMS2 | CRC002D | liver      | GSE41568  |
| GSM1019391 | CMS2 | CRC007A | liver      | GSE41568  |
| GSM1019392 | CMS2 | CRC011  | liver      | GSE41568  |
| GSM1019393 | CMS2 | CRC015  | liver      | GSE41568  |
| GSM1019394 | CMS4 | CRC019  | liver      | GSE41568  |
| GSM1019395 | CMS2 | CRC021B | liver      | GSE41568  |
| GSM1019396 | CMS3 | CRC022  | liver      | GSE41568  |
| GSM1019397 | CMS2 | CRC024A | liver      | GSE41568  |
| GSM1019398 | CMS2 | CRC025B | lung       | GSE41568  |
| GSM1019399 | CMS2 | CRC028A | liver      | GSE41568  |
| GSM1019400 | CMS4 | CRC030A | lung       | GSE41568  |
| GSM1019401 | CMS2 | CRC033  | liver      | GSE41568  |
| GSM1019402 | CMS2 | CRC037A | liver      | GSE41568  |
| GSM1019403 | CMS3 | CRC039A | liver      | GSE41568  |
| GSM1019404 | CMS2 | CRC040  | liver      | GSE41568  |
| GSM1019405 | CMS2 | CRC041  | liver      | GSE41568  |
| GSM1019406 | CMS2 | CRC043A | lung       | GSE41568  |
| GSM1019407 | CMS4 | CRC044  | liver      | GSE41568  |
| GSM1019408 | CMS2 | CRC045  | liver      | GSE41568  |
| GSM1019409 | CMS2 | CRC047  | liver      | GSE41568  |
| GSM1019410 | CMS2 | CRC049  | liver      | GSE41568  |
| GSM1019411 | CMS4 | CRC050  | liver      | GSE41568  |
| GSM1019412 | CMS2 | CRC051  | liver      | GSE41568  |
| GSM1019413 | CMS4 | CRC054  | lung       | GSE41568  |
| GSM1019414 | CMS2 | CRC056  | liver      | GSE41568  |
| GSM1019415 | CMS3 | CRC057A | liver      | GSE41568  |
| GSM1019416 | CMS2 | CRC058  | liver      | GSE41568  |
| GSM1019417 | CMS2 | CRC060  | liver      | GSE41568  |
| GSM1019418 | CMS2 | CRC061  | liver      | GSE41568  |
| GSM1019419 | CMS2 | CRC062  | liver      | GSE41568  |
| GSM1019420 | CMS2 | CRC063  | liver      | GSE41568  |
| GSM1019421 | CMS2 | CRC066A | liver      | GSE41568  |

|            |      |         |            |          |
|------------|------|---------|------------|----------|
| GSM1019422 | CMS4 | CRC067A | liver      | GSE41568 |
| GSM1019423 | CMS2 | CRC074A | liver      | GSE41568 |
| GSM1019424 | CMS2 | CRC075A | liver      | GSE41568 |
| GSM1019425 | CMS4 | CRC077A | liver      | GSE41568 |
| GSM1019426 | CMS2 | CRC078A | liver      | GSE41568 |
| GSM1019427 | CMS2 | CRC083A | peritoneum | GSE41568 |
| GSM1019428 | CMS2 | CRC087A | liver      | GSE41568 |
| GSM1019429 | CMS4 | CRC088A | peritoneum | GSE41568 |
| GSM1019430 | CMS2 | CRC089A | liver      | GSE41568 |
| GSM1019431 | CMS4 | CRC092  | liver      | GSE41568 |
| GSM1019432 | CMS4 | CRC093A | lung       | GSE41568 |
| GSM1019433 | CMS3 | CRC094  | liver      | GSE41568 |
| GSM1019434 | CMS3 | CRC094B | liver      | GSE41568 |
| GSM1019435 | CMS2 | CRC096  | liver      | GSE41568 |
| GSM1019436 | CMS2 | CRC097  | liver      | GSE41568 |
| GSM1019437 | CMS4 | CRC098D | liver      | GSE41568 |
| GSM1019438 | CMS2 | CRC102A | liver      | GSE41568 |
| GSM1019439 | CMS1 | CRC103  | liver      | GSE41568 |
| GSM1019440 | CMS3 | CRC103C | liver      | GSE41568 |
| GSM1019441 | CMS2 | CRC105B | liver      | GSE41568 |
| GSM1019442 | CMS2 | CRC107A | liver      | GSE41568 |
| GSM1019443 | CMS2 | CRC108  | liver      | GSE41568 |
| GSM1019444 | CMS2 | CRC108B | liver      | GSE41568 |
| GSM1019445 | CMS2 | CRC109A | liver      | GSE41568 |
| GSM1019446 | CMS4 | CRC112  | liver      | GSE41568 |
| GSM1019447 | CMS4 | CRC118A | liver      | GSE41568 |
| GSM1019448 | CMS2 | CRC119A | liver      | GSE41568 |
| GSM1019449 | CMS1 | CRC120A | peritoneum | GSE41568 |
| GSM1019450 | CMS1 | CRC125A | liver      | GSE41568 |
| GSM1019451 | CMS2 | CRC128A | liver      | GSE41568 |
| GSM1019452 | CMS4 | CRC128C | liver      | GSE41568 |
| GSM1019454 | CMS3 | CRC133A | liver      | GSE41568 |
| GSM1019455 | CMS4 | CRC134A | liver      | GSE41568 |
| GSM1019456 | CMS2 | CRC135A | lung       | GSE41568 |
| GSM1019457 | CMS2 | CRC145A | liver      | GSE41568 |
| GSM1019458 | CMS4 | CRC147A | liver      | GSE41568 |
| GSM1019459 | CMS1 | CRC148A | liver      | GSE41568 |
| GSM1019460 | CMS4 | CRC149A | liver      | GSE41568 |
| GSM1019461 | CMS1 | CRC151A | liver      | GSE41568 |
| GSM1019462 | CMS2 | CRC159  | liver      | GSE41568 |
| GSM1019463 | CMS2 | CRC160A | liver      | GSE41568 |
| GSM1019464 | CMS2 | CRC162A | liver      | GSE41568 |
| GSM1019465 | CMS2 | CRC165A | liver      | GSE41568 |
| GSM1019466 | CMS2 | CRC167  | liver      | GSE41568 |
| GSM1019467 | CMS2 | CRC170  | lung       | GSE41568 |
| GSM1019468 | CMS2 | CRC172A | liver      | GSE41568 |
| GSM1019469 | CMS2 | CRC174B | liver      | GSE41568 |
| GSM1019470 | CMS4 | CRC180A | peritoneum | GSE41568 |

|            |      |         |            |          |
|------------|------|---------|------------|----------|
| GSM1019471 | CMS4 | CRC221A | liver      | GSE41568 |
| GSM1019472 | CMS2 | CRC221C | liver      | GSE41568 |
| GSM1019473 | CMS2 | CRC221D | liver      | GSE41568 |
| GSM1019474 | CMS2 | CRC230A | liver      | GSE41568 |
| GSM1019475 | CMS2 | CRC236A | liver      | GSE41568 |
| GSM1019476 | CMS2 | CRC236B | liver      | GSE41568 |
| GSM1019477 | CMS4 | CRC241A | liver      | GSE41568 |
| GSM1019478 | CMS2 | CRC249A | liver      | GSE41568 |
| GSM1019479 | CMS4 | CRC249B | liver      | GSE41568 |
| GSM1019480 | CMS4 | CRC251B | peritoneum | GSE41568 |
| GSM1019481 | CMS2 | CRC253A | liver      | GSE41568 |
| GSM1019482 | CMS2 | CRC261A | liver      | GSE41568 |
| GSM1019483 | CMS2 | CRC262  | lung       | GSE41568 |

---

**Supplementary Table 6. Data of primary tumors and paired metastases from GEO datasets.**

| <b>sample_ID</b> | <b>SSP.CMS</b> | <b>patient_id</b> | <b>tissue_site</b> | <b>batch</b> | <b>matched</b> |
|------------------|----------------|-------------------|--------------------|--------------|----------------|
| GSM1673255       | CMS4           | Patient_269       | liver              | GSE68468     | YES            |
| GSM1673256       | CMS4           | Patient_269       | primary            | GSE68468     | YES            |
| GSM1673214       | CMS2           | Patient_270       | primary            | GSE68468     | YES            |
| GSM1673217       | CMS2           | Patient_270       | liver              | GSE68468     | YES            |
| GSM1673110       | CMS4           | Patient_273       | primary            | GSE68468     | YES            |
| GSM1673112       | CMS4           | Patient_273       | liver              | GSE68468     | YES            |
| GSM160976        | CMS2           | DA85401           | liver              | GSE6988      | YES            |
| GSM160978        | CMS2           | DA85401           | primary            | GSE6988      | YES            |
| GSM161021        | CMS4           | DX70008           | liver              | GSE6988      | YES            |
| GSM161023        | CMS4           | DX70008           | primary            | GSE6988      | YES            |
| GSM161032        | CMS4           | DX73339           | liver              | GSE6988      | YES            |
| GSM161034        | CMS4           | DX73339           | primary            | GSE6988      | YES            |
| GSM161036        | CMS4           | DX86797           | liver              | GSE6988      | YES            |
| GSM161038        | CMS4           | DX86797           | primary            | GSE6988      | YES            |
| GSM161049        | CMS4           | DA09647           | liver              | GSE6988      | YES            |
| GSM161053        | CMS4           | DA09647           | primary            | GSE6988      | YES            |
| GSM89262         | CMS4           | P10               | liver              | GSE3964      | YES            |
| GSM89282         | CMS4           | P10               | primary            | GSE3964      | YES            |
| GSM89273         | CMS2           | P7                | liver              | GSE3964      | YES            |
| GSM89428         | CMS2           | P7                | primary            | GSE3964      | YES            |
| GSM89274         | CMS4           | P8                | liver              | GSE3964      | YES            |
| GSM89429         | CMS4           | P8                | primary            | GSE3964      | YES            |
| GSM89275         | CMS4           | P9                | liver              | GSE3964      | YES            |
| GSM89430         | CMS4           | P9                | primary            | GSE3964      | YES            |
| GSM653231        | CMS3           | patient 1-1       | primary            | GSE26571     | YES            |
| GSM653232        | CMS3           | patient 1-1       | primary            | GSE26571     | YES            |
| GSM653243        | CMS3           | patient 1-2       | lymphnode          | GSE26571     | YES            |
| GSM653244        | CMS3           | patient 1-2       | lymphnode          | GSE26571     | YES            |
| GSM653236        | CMS3           | patient 6         | primary            | GSE26571     | YES            |
| GSM653248        | CMS3           | patient 6-1       | lymphnode          | GSE26571     | YES            |
| GSM653249        | CMS3           | patient 6-2       | lymphnode          | GSE26571     | YES            |
| GSM653237        | CMS2           | patient 7         | primary            | GSE26571     | YES            |
| GSM653250        | CMS2           | patient 7         | lymphnode          | GSE26571     | YES            |
| GSM653239        | CMS3           | patient_9         | primary            | GSE26571     | YES            |
| GSM653252        | CMS3           | patient_9         | liver              | GSE26571     | YES            |
| GSM875936        | CMS4           | NO. 10397         | primary            | GSE35834     | YES            |
| GSM875951        | CMS4           | NO. 10397         | liver              | GSE35834     | YES            |
| GSM875941        | CMS2           | NO. 10566         | primary            | GSE35834     | YES            |
| GSM876001        | CMS2           | NO. 10566         | liver              | GSE35834     | YES            |
| GSM875956        | CMS2           | NO. 3976          | liver              | GSE35834     | YES            |
| GSM875957        | CMS2           | NO. 3976          | primary            | GSE35834     | YES            |
| GSM875963        | CMS3           | NO. 5007          | primary            | GSE35834     | YES            |
| GSM876003        | CMS3           | NO. 5007          | liver              | GSE35834     | YES            |
| GSM875934        | CMS2           | NO. 5525          | primary            | GSE35834     | YES            |

|            |      |             |         |          |     |
|------------|------|-------------|---------|----------|-----|
| GSM875949  | CMS2 | NO. 5525    | liver   | GSE35834 | YES |
| GSM875955  | CMS2 | NO. 5647    | liver   | GSE35834 | YES |
| GSM875971  | CMS2 | NO. 5647    | primary | GSE35834 | YES |
| GSM875959  | CMS2 | NO. 5881    | liver   | GSE35834 | YES |
| GSM875965  | CMS2 | NO. 5881    | primary | GSE35834 | YES |
| GSM875968  | CMS2 | NO. 6661    | primary | GSE35834 | YES |
| GSM875990  | CMS2 | NO. 6661    | liver   | GSE35834 | YES |
| GSM875972  | CMS2 | NO. 7349    | primary | GSE35834 | YES |
| GSM876008  | CMS2 | NO. 7349    | liver   | GSE35834 | YES |
| GSM875992  | CMS2 | NO. 7392    | liver   | GSE35834 | YES |
| GSM876007  | CMS2 | NO. 7392    | primary | GSE35834 | YES |
| GSM875945  | CMS2 | NO. 9984    | primary | GSE35834 | YES |
| GSM875953  | CMS2 | NO. 9984    | liver   | GSE35834 | YES |
| GSM992272  | CMS3 | GIM-01      | liver   | GSE40367 | YES |
| GSM992273  | CMS3 | GIM-01      | primary | GSE40367 | YES |
| GSM992274  | CMS2 | GIM-02      | liver   | GSE40367 | YES |
| GSM992275  | CMS2 | GIM-02      | primary | GSE40367 | YES |
| GSM992276  | CMS2 | GIM-04      | liver   | GSE40367 | YES |
| GSM992277  | CMS2 | GIM-04      | primary | GSE40367 | YES |
| GSM992283  | CMS2 | GIM-13      | liver   | GSE40367 | YES |
| GSM992284  | CMS2 | GIM-13      | primary | GSE40367 | YES |
| GSM992285  | CMS2 | GIM-14      | liver   | GSE40367 | YES |
| GSM992286  | CMS2 | GIM-14      | primary | GSE40367 | YES |
| GSM1197996 | CMS4 | patient_1   | primary | GSE49355 | YES |
| GSM1197998 | CMS4 | patient_1   | liver   | GSE49355 | YES |
| GSM1198025 | CMS1 | patient_108 | liver   | GSE49355 | YES |
| GSM1198026 | CMS1 | patient_108 | primary | GSE49355 | YES |
| GSM1198036 | CMS2 | patient_185 | liver   | GSE49355 | YES |
| GSM1198037 | CMS2 | patient_185 | primary | GSE49355 | YES |
| GSM1198039 | CMS2 | patient_202 | liver   | GSE49355 | YES |
| GSM1198041 | CMS2 | patient_202 | primary | GSE49355 | YES |
| GSM1198042 | CMS2 | patient_209 | liver   | GSE49355 | YES |
| GSM1198043 | CMS2 | patient_209 | primary | GSE49355 | YES |
| GSM1198048 | CMS2 | patient_238 | primary | GSE49355 | YES |
| GSM1198049 | CMS2 | patient_238 | liver   | GSE49355 | YES |
| GSM1198004 | CMS2 | patient_42  | liver   | GSE49355 | YES |
| GSM1198006 | CMS2 | patient_42  | primary | GSE49355 | YES |
| GSM1198009 | CMS2 | patient_51  | liver   | GSE49355 | YES |
| GSM1198010 | CMS2 | patient_51  | primary | GSE49355 | YES |
| GSM1198017 | CMS2 | patient_77  | liver   | GSE49355 | YES |
| GSM1198018 | CMS2 | patient_77  | primary | GSE49355 | YES |
| GSM1198019 | CMS2 | patient_93  | liver   | GSE49355 | YES |
| GSM1198020 | CMS2 | patient_93  | primary | GSE49355 | YES |
| GSM1525216 | CMS2 | patient_1   | primary | GSE62321 | YES |
| GSM1525238 | CMS2 | patient_1   | liver   | GSE62321 | YES |
| GSM1525225 | CMS1 | patient_108 | primary | GSE62321 | YES |
| GSM1525247 | CMS1 | patient_108 | liver   | GSE62321 | YES |
| GSM1525230 | CMS2 | patient_185 | primary | GSE62321 | YES |

|            |      |             |            |           |     |
|------------|------|-------------|------------|-----------|-----|
| GSM1525250 | CMS2 | patient_185 | liver      | GSE62321  | YES |
| GSM1525231 | CMS2 | patient_202 | primary    | GSE62321  | YES |
| GSM1525251 | CMS2 | patient_202 | liver      | GSE62321  | YES |
| GSM1525232 | CMS2 | patient_209 | primary    | GSE62321  | YES |
| GSM1525252 | CMS2 | patient_209 | liver      | GSE62321  | YES |
| GSM1525233 | CMS2 | patient_238 | primary    | GSE62321  | YES |
| GSM1525253 | CMS2 | patient_238 | liver      | GSE62321  | YES |
| GSM1525218 | CMS2 | patient_42  | primary    | GSE62321  | YES |
| GSM1525239 | CMS2 | patient_42  | liver      | GSE62321  | YES |
| GSM1525220 | CMS2 | patient_51  | primary    | GSE62321  | YES |
| GSM1525241 | CMS2 | patient_51  | liver      | GSE62321  | YES |
| GSM1525221 | CMS2 | patient_56  | primary    | GSE62321  | YES |
| GSM1525242 | CMS2 | patient_56  | liver      | GSE62321  | YES |
| GSM1525223 | CMS2 | patient_77  | primary    | GSE62321  | YES |
| GSM1525243 | CMS2 | patient_77  | liver      | GSE62321  | YES |
| GSM1525224 | CMS2 | patient_93  | primary    | GSE62321  | YES |
| GSM1525245 | CMS2 | patient_93  | liver      | GSE62321  | YES |
| GSM2157182 | CMS2 | 714         | liver      | GSE81558  | YES |
| GSM2157203 | CMS2 | 714         | primary    | GSE81558  | YES |
| GSM2157173 | CMS2 | 6346        | liver      | GSE81558  | YES |
| GSM2157192 | CMS2 | 6346        | primary    | GSE81558  | YES |
| GSM2157174 | CMS2 | 6349        | liver      | GSE81558  | YES |
| GSM2157193 | CMS2 | 6349        | primary    | GSE81558  | YES |
| GSM2157175 | CMS2 | 6382        | liver      | GSE81558  | YES |
| GSM2157194 | CMS2 | 6382        | primary    | GSE81558  | YES |
| GSM2157176 | CMS2 | 6383        | liver      | GSE81558  | YES |
| GSM2157195 | CMS2 | 6383        | primary    | GSE81558  | YES |
| GSM2157177 | CMS2 | 6391        | liver      | GSE81558  | YES |
| GSM2157196 | CMS2 | 6391        | primary    | GSE81558  | YES |
| GSM2157180 | CMS1 | 6967        | liver      | GSE81558  | YES |
| GSM2157201 | CMS1 | 6967        | primary    | GSE81558  | YES |
| GSM2157184 | CMS2 | 7164        | liver      | GSE81558  | YES |
| GSM2157206 | CMS2 | 7164        | primary    | GSE81558  | YES |
| GSM2157189 | CMS2 | F535        | liver      | GSE81558  | YES |
| GSM2157212 | CMS2 | F535        | primary    | GSE81558  | YES |
| GSM2157190 | CMS2 | F544        | liver      | GSE81558  | YES |
| GSM2157213 | CMS2 | F544        | primary    | GSE81558  | YES |
| GSM4451139 | CMS4 | patient_6   | primary    | GSE147971 | YES |
| GSM4451140 | CMS4 | patient_6   | peritoneum | GSE147971 | YES |
| GSM4451141 | CMS4 | patient_7   | primary    | GSE147971 | YES |
| GSM4451142 | CMS4 | patient_7   | peritoneum | GSE147971 | YES |
| GSM1673290 | CMS2 | Patient_212 | primary    | GSE68468  | NO  |
| GSM1673292 | CMS4 | Patient_212 | liver      | GSE68468  | NO  |
| GSM1673051 | CMS4 | Patient_274 | liver      | GSE68468  | NO  |
| GSM1673054 | CMS2 | Patient_274 | primary    | GSE68468  | NO  |
| GSM160549  | CMS2 | AD15889     | liver      | GSE6988   | NO  |
| GSM160830  | CMS4 | AD15889     | primary    | GSE6988   | NO  |
| GSM160968  | CMS4 | CA75662     | liver      | GSE6988   | NO  |

|            |      |             |           |          |    |
|------------|------|-------------|-----------|----------|----|
| GSM160970  | CMS2 | CA75662     | primary   | GSE6988  | NO |
| GSM160972  | CMS2 | CH76639     | liver     | GSE6988  | NO |
| GSM160974  | CMS4 | CH76639     | primary   | GSE6988  | NO |
| GSM160980  | CMS4 | DA86595     | liver     | GSE6988  | NO |
| GSM160984  | CMS3 | DA86595     | primary   | GSE6988  | NO |
| GSM160986  | CMS4 | DB14731     | liver     | GSE6988  | NO |
| GSM160988  | CMS3 | DB14731     | primary   | GSE6988  | NO |
| GSM160990  | CMS1 | DB33368     | liver     | GSE6988  | NO |
| GSM160992  | CMS4 | DB33368     | primary   | GSE6988  | NO |
| GSM161040  | CMS4 | EX36605     | liver     | GSE6988  | NO |
| GSM161042  | CMS2 | EX36605     | primary   | GSE6988  | NO |
| GSM161055  | CMS2 | DD13676     | liver     | GSE6988  | NO |
| GSM161057  | CMS4 | DD13676     | primary   | GSE6988  | NO |
| GSM89265   | CMS4 | P12         | liver     | GSE3964  | NO |
| GSM89283   | CMS2 | P12         | primary   | GSE3964  | NO |
| GSM89272   | CMS2 | P6          | liver     | GSE3964  | NO |
| GSM89427   | CMS4 | P6          | primary   | GSE3964  | NO |
| GSM653234  | CMS2 | patient 3   | primary   | GSE26571 | NO |
| GSM653245  | CMS3 | patient 3   | lymphnode | GSE26571 | NO |
| GSM653235  | CMS3 | patient 4   | primary   | GSE26571 | NO |
| GSM653246  | CMS2 | patient 4   | lymphnode | GSE26571 | NO |
| GSM653240  | CMS2 | patient 10  | primary   | GSE26571 | NO |
| GSM653253  | CMS3 | patient 10  | liver     | GSE26571 | NO |
| GSM653238  | CMS3 | patient 8   | primary   | GSE26571 | NO |
| GSM653251  | CMS4 | patient 8   | lymphnode | GSE26571 | NO |
| GSM875995  | CMS4 | NO. 11140   | primary   | GSE35834 | NO |
| GSM876006  | CMS2 | NO. 11140   | liver     | GSE35834 | NO |
| GSM875947  | CMS3 | NO. 12188   | primary   | GSE35834 | NO |
| GSM875962  | CMS1 | NO. 12188   | liver     | GSE35834 | NO |
| GSM875935  | CMS1 | NO. 5773    | primary   | GSE35834 | NO |
| GSM875961  | CMS2 | NO. 5773    | liver     | GSE35834 | NO |
| GSM875979  | CMS2 | NO. 7077    | liver     | GSE35834 | NO |
| GSM875998  | CMS4 | NO. 7077    | primary   | GSE35834 | NO |
| GSM875969  | CMS3 | NO. 9597    | primary   | GSE35834 | NO |
| GSM875980  | CMS2 | NO. 9597    | liver     | GSE35834 | NO |
| GSM875933  | CMS2 | NO. 9821    | primary   | GSE35834 | NO |
| GSM875946  | CMS4 | NO. 9821    | liver     | GSE35834 | NO |
| GSM992278  | CMS3 | GIM-09      | liver     | GSE40367 | NO |
| GSM992279  | CMS1 | GIM-09      | primary   | GSE40367 | NO |
| GSM992281  | CMS2 | GIM-12      | liver     | GSE40367 | NO |
| GSM992282  | CMS3 | GIM-12      | primary   | GSE40367 | NO |
| GSM1198030 | CMS3 | patient_141 | primary   | GSE49355 | NO |
| GSM1198031 | CMS2 | patient_141 | liver     | GSE49355 | NO |
| GSM1198051 | CMS3 | patient_261 | primary   | GSE49355 | NO |
| GSM1198052 | CMS2 | patient_261 | liver     | GSE49355 | NO |
| GSM1198011 | CMS2 | patient_56  | liver     | GSE49355 | NO |
| GSM1198012 | CMS4 | patient_56  | primary   | GSE49355 | NO |
| GSM1525228 | CMS3 | patient_141 | primary   | GSE62321 | NO |



|            |      |             |            |           |    |
|------------|------|-------------|------------|-----------|----|
| GSM1525248 | CMS2 | patient_141 | liver      | GSE62321  | NO |
| GSM1525235 | CMS3 | patient_261 | primary    | GSE62321  | NO |
| GSM1525254 | CMS2 | patient_261 | liver      | GSE62321  | NO |
| GSM2157178 | CMS2 | 662         | liver      | GSE81558  | NO |
| GSM2157197 | CMS4 | 662         | primary    | GSE81558  | NO |
| GSM2157181 | CMS4 | 713         | liver      | GSE81558  | NO |
| GSM2157202 | CMS2 | 713         | primary    | GSE81558  | NO |
| GSM2157183 | CMS2 | 718         | liver      | GSE81558  | NO |
| GSM2157204 | CMS1 | 718         | primary    | GSE81558  | NO |
| GSM2157179 | CMS2 | 6753        | liver      | GSE81558  | NO |
| GSM2157198 | CMS4 | 6753        | primary    | GSE81558  | NO |
| GSM2157185 | CMS2 | 7196        | liver      | GSE81558  | NO |
| GSM2157208 | CMS1 | 7196        | primary    | GSE81558  | NO |
| GSM2157187 | CMS2 | F33         | liver      | GSE81558  | NO |
| GSM2157210 | CMS4 | F33         | primary    | GSE81558  | NO |
| GSM2157188 | CMS1 | F53         | liver      | GSE81558  | NO |
| GSM2157211 | CMS4 | F53         | primary    | GSE81558  | NO |
| GSM2157191 | CMS2 | F545        | liver      | GSE81558  | NO |
| GSM2157214 | CMS4 | F545        | primary    | GSE81558  | NO |
| GSM4451146 | CMS3 | patient_13  | primary    | GSE147971 | NO |
| GSM4451147 | CMS4 | patient_13  | peritoneum | GSE147971 | NO |

**Supplementary Table 7. Multiplex immunohistochemistry staining panel.**

| <b>Fig.6-8</b> | <b>Primary antibody</b> |                |                 |                 |                   | <b>TSA dye</b>  |                 |             |
|----------------|-------------------------|----------------|-----------------|-----------------|-------------------|-----------------|-----------------|-------------|
| <b>Antigen</b> | <b>Ab Type</b>          | <b>Company</b> | <b>Cat. No.</b> | <b>Dilution</b> | <b>Time</b>       | <b>TS<br/>A</b> | <b>Dilution</b> | <b>Time</b> |
| <b>CD206</b>   | Rabbit<br>mAb           | CST            | 24595           | 1:400           | 4°C,<br>overnight | 520             | 1:100           | 10min       |
| <b>CD8α</b>    | Mouse<br>mAb            | CST            | 70306           | 1:400           | RT, 2h            | 570             | 1:100           | 10min       |
| <b>CD4</b>     | Rabbit<br>mAb           | Abcam          | Ab133616        | 1:500           | 4°C,<br>overnight | 690             | 1:100           | 10min       |
| <b>FoxP3</b>   | Rabbit<br>mAb           | CST            | 98377           | 1:100           | RT, 2h            | 620             | 1:100           | 10min       |
| <b>α-SMA</b>   | Rabbit<br>pAb           | Proteintech    | 14395-1-A<br>P  | 1:1000<br>0     | 4°C,<br>overnight | 480             | 1:100           | 10min       |
| <b>DAPI</b>    | -                       | Beyotime       | C1006           | -               | RT,<br>15min      | -               | -               | -           |

mAb: monoclonal antibody; pAb: polyclonal antibody; RT: room temperature

**Supplementary Table 8. Baseline characteristics of patients with primary CRC from GEO database.**

| <b>CHARACTERISTICS</b>       | <b>TOTAL<br/>(N= 457)</b> | <b>CMS1<br/>(N= 79)</b> | <b>CMS2<br/>(N= 241)</b> | <b>CMS3<br/>(N= 63)</b> | <b>CMS4<br/>(N= 74)</b> | <b>P</b> |
|------------------------------|---------------------------|-------------------------|--------------------------|-------------------------|-------------------------|----------|
| <b>AGE, MEDIAN<br/>(IQR)</b> | 69.0<br>(60.0,76.0)       | 73.0<br>(65.5,79.0)     | 68.0<br>(58.0,75.0)      | 70.0<br>(62.5,77.0)     | 66.0<br>(57.3,74.8)     | 0.014    |
| <b>GENDER, N (%)</b>         |                           |                         |                          |                         |                         | 0.15     |
| <b>FEMALE</b>                | 207 (45.3)                | 44 (55.7)               | 101 (41.9)               | 26 (41.3)               | 36 (48.6)               |          |
| <b>MALE</b>                  | 250 (54.7)                | 35 (44.3)               | 140 (58.1)               | 37 (58.7)               | 38 (51.4)               |          |
| <b>AJCC STAGE, N (%)</b>     |                           |                         |                          |                         |                         | < 0.001  |
| <b>0</b>                     | 4 ( 0.9)                  | 0 (0)                   | 0 (0)                    | 4 (6.3)                 | 0 (0)                   |          |
| <b>I</b>                     | 22 ( 4.8)                 | 3 (3.8)                 | 15 (6.2)                 | 3 (4.8)                 | 1 (1.4)                 |          |
| <b>II</b>                    | 219 (47.9)                | 46 (58.2)               | 119 (49.4)               | 28 (44.4)               | 26 (35.1)               |          |
| <b>III</b>                   | 164 (35.9)                | 29 (36.7)               | 84 (34.9)                | 21 (33.3)               | 30 (40.5)               |          |
| <b>IV</b>                    | 48 (10.5)                 | 1 (1.3)                 | 23 (9.5)                 | 7 (11.1)                | 17 (23)                 |          |
| <b>T, N (%)</b>              |                           |                         |                          |                         |                         | 0.003    |
|                              | 17 ( 3.7)                 | 2 (2.5)                 | 8 (3.3)                  | 2 (3.2)                 | 5 (6.8)                 |          |
| <b>TIS</b>                   | 3 ( 0.7)                  | 0 (0)                   | 0 (0)                    | 3 (4.8)                 | 0 (0)                   |          |
| <b>T0</b>                    | 1 ( 0.2)                  | 0 (0)                   | 0 (0)                    | 1 (1.6)                 | 0 (0)                   |          |
| <b>T1</b>                    | 8 ( 1.8)                  | 0 (0)                   | 7 (2.9)                  | 1 (1.6)                 | 0 (0)                   |          |
| <b>T2</b>                    | 33 ( 7.2)                 | 4 (5.1)                 | 24 (10)                  | 4 (6.3)                 | 1 (1.4)                 |          |
| <b>T3</b>                    | 300 (65.6)                | 53 (67.1)               | 164 (68)                 | 36 (57.1)               | 47 (63.5)               |          |
| <b>T4</b>                    | 95 (20.8)                 | 20 (25.3)               | 38 (15.8)                | 16 (25.4)               | 21 (28.4)               |          |
| <b>N, N (%)</b>              |                           |                         |                          |                         |                         | 0.208    |
|                              | 22 ( 4.8)                 | 3 (3.8)                 | 12 (5)                   | 2 (3.2)                 | 5 (6.8)                 |          |
| <b>N0</b>                    | 246 (53.8)                | 47 (59.5)               | 133 (55.2)               | 36 (57.1)               | 30 (40.5)               |          |
| <b>N1</b>                    | 108 (23.6)                | 16 (20.3)               | 60 (24.9)                | 16 (25.4)               | 16 (21.6)               |          |
| <b>N2</b>                    | 76 (16.6)                 | 13 (16.5)               | 34 (14.1)                | 8 (12.7)                | 21 (28.4)               |          |
| <b>N3</b>                    | 5 ( 1.1)                  | 0 (0)                   | 2 (0.8)                  | 1 (1.6)                 | 2 (2.7)                 |          |
| <b>M, N (%)</b>              |                           |                         |                          |                         |                         | < 0.001  |
|                              | 17 ( 3.7)                 | 2 (2.5)                 | 8 (3.3)                  | 2 (3.2)                 | 5 (6.8)                 |          |
| <b>M0</b>                    | 389 (85.1)                | 75 (94.9)               | 210 (87.1)               | 54 (85.7)               | 50 (67.6)               |          |
| <b>M1</b>                    | 49 (10.7)                 | 1 (1.3)                 | 23 (9.5)                 | 7 (11.1)                | 18 (24.3)               |          |
| <b>MX</b>                    | 2 ( 0.4)                  | 1 (1.3)                 | 0 (0)                    | 0 (0)                   | 1 (1.4)                 |          |
| <b>TUMOR LOCATION, N (%)</b> |                           |                         |                          |                         |                         | < 0.001  |
| <b>LEFT</b>                  | 271 (59.3)                | 13 (16.5)               | 190 (78.8)               | 27 (42.9)               | 41 (55.4)               |          |
| <b>RIGHT</b>                 | 186 (40.7)                | 66 (83.5)               | 51 (21.2)                | 36 (57.1)               | 33 (44.6)               |          |
| <b>MMR STATUS, N (%)</b>     |                           |                         |                          |                         |                         | < 0.001  |
|                              | 37 ( 8.1)                 | 10 (12.7)               | 17 (7.1)                 | 3 (4.8)                 | 7 (9.5)                 |          |
| <b>DMMR</b>                  | 61 (13.3)                 | 55 (69.6)               | 2 (0.8)                  | 2 (3.2)                 | 2 (2.7)                 |          |

|                                     |            |           |            |           |           |
|-------------------------------------|------------|-----------|------------|-----------|-----------|
| <b>PMMR</b>                         | 359 (78.6) | 14 (17.7) | 222 (92.1) | 58 (92.1) | 65 (87.8) |
| <b>CIMP STATUS, N (%)</b>           |            |           |            |           | < 0.001   |
|                                     | 60 (13.1)  | 8 (10.1)  | 37 (15.4)  | 6 (9.5)   | 9 (12.2)  |
| -                                   | 320 (70.0) | 18 (22.8) | 198 (82.2) | 46 (73)   | 58 (78.4) |
| +                                   | 77 (16.8)  | 53 (67.1) | 6 (2.5)    | 11 (17.5) | 7 (9.5)   |
| <b>CIN STATUS, N (%)</b>            |            |           |            |           | < 0.001   |
|                                     | 85 (18.6)  | 11 (13.9) | 53 (22)    | 9 (14.3)  | 12 (16.2) |
| -                                   | 85 (18.6)  | 43 (54.4) | 9 (3.7)    | 23 (36.5) | 10 (13.5) |
| +                                   | 287 (62.8) | 25 (31.6) | 179 (74.3) | 31 (49.2) | 52 (70.3) |
| <b>TP53 MUTATION, N (%)</b>         |            |           |            |           | < 0.001   |
|                                     | 169 (37.0) | 37 (46.8) | 78 (32.4)  | 24 (38.1) | 30 (40.5) |
| <b>M</b>                            | 152 (33.3) | 11 (13.9) | 111 (46.1) | 9 (14.3)  | 21 (28.4) |
| <b>WT</b>                           | 136 (29.8) | 31 (39.2) | 52 (21.6)  | 30 (47.6) | 23 (31.1) |
| <b>KRAF MUTATION, N (%)</b>         |            |           |            |           | < 0.001   |
|                                     | 17 ( 3.7)  | 2 (2.5)   | 10 (4.1)   | 3 (4.8)   | 2 (2.7)   |
| <b>M</b>                            | 162 (35.4) | 19 (24.1) | 72 (29.9)  | 47 (74.6) | 24 (32.4) |
| <b>WT</b>                           | 278 (60.8) | 58 (73.4) | 159 (66)   | 13 (20.6) | 48 (64.9) |
| <b>BRAF MUTATION, N (%)</b>         |            |           |            |           | < 0.001   |
|                                     | 45 ( 9.8)  | 5 (6.3)   | 31 (12.9)  | 4 (6.3)   | 5 (6.8)   |
| <b>M</b>                            | 46 (10.1)  | 38 (48.1) | 0 (0)      | 4 (6.3)   | 4 (5.4)   |
| <b>WT</b>                           | 366 (80.1) | 36 (45.6) | 210 (87.1) | 55 (87.3) | 65 (87.8) |
| <b>CHEMOTHERAPY ADJUVANT, N (%)</b> |            |           |            |           | < 0.001   |
|                                     | 14 ( 3.1)  | 1 (1.3)   | 6 (2.5)    | 2 (3.2)   | 5 (6.8)   |
| <b>N</b>                            | 254 (55.6) | 61 (77.2) | 130 (53.9) | 33 (52.4) | 30 (40.5) |
| <b>Y</b>                            | 189 (41.4) | 17 (21.5) | 105 (43.6) | 28 (44.4) | 39 (52.7) |
| <b>CHEMOTHERAPY TYPE, N (%)</b>     |            |           |            |           | 0.099     |
|                                     | 322 (70.5) | 66 (83.5) | 172 (71.4) | 40 (63.5) | 44 (59.5) |
| <b>5FU</b>                          | 62 (13.6)  | 8 (10.1)  | 28 (11.6)  | 12 (19)   | 14 (18.9) |
| <b>FOLFIRI</b>                      | 10 ( 2.2)  | 0 (0)     | 6 (2.5)    | 1 (1.6)   | 3 (4.1)   |
| <b>FOLFOX</b>                       | 17 ( 3.7)  | 0 (0)     | 10 (4.1)   | 2 (3.2)   | 5 (6.8)   |
| <b>FUFOL</b>                        | 44 ( 9.6)  | 4 (5.1)   | 24 (10)    | 8 (12.7)  | 8 (10.8)  |
| <b>OTHER</b>                        | 2 ( 0.4)   | 1 (1.3)   | 1 (0.4)    | 0 (0)     | 0 (0)     |

**Supplementary Table 9. Baseline characteristics of patients with primary CRC from TCGA database.**

| <b>CHARAC<br/>TERISTICS</b>       | <b>TOTAL<br/>(N = 308)</b> | <b>CMS1<br/>(N = 49)</b>   | <b>CMS2<br/>(N = 180)</b>  | <b>CMS3<br/>(N = 29)</b>   | <b>CMS4<br/>(N = 50)</b>   | <b>P</b>  |
|-----------------------------------|----------------------------|----------------------------|----------------------------|----------------------------|----------------------------|-----------|
| <b>AGE, MEDIAN<br/>(IQR)</b>      | 66.0<br>(55.0,<br>74.0)    | 71.0<br>(58.0,<br>79.0)    | 65.0<br>(55.0,<br>74.0)    | 65.0<br>(53.0,<br>73.0)    | 64.0<br>(56.3,<br>72.0)    | 0.1<br>91 |
| <b>GENDER, N (%)</b>              |                            |                            |                            |                            |                            | 0.508     |
| <b>FEMALE</b>                     | 140 (45.5)                 | 26 (53.1)                  | 76 (42.2)                  | 13 (44.8)                  | 25 (50)                    |           |
| <b>MALE</b>                       | 168 (54.5)                 | 23 (46.9)                  | 104 (57.8)                 | 16 (55.2)                  | 25 (50)                    |           |
| <b>BMI, MEDIAN<br/>(IQR)</b>      | 27.00<br>(24.08,<br>31.39) | 25.30<br>(23.34,<br>29.07) | 26.68<br>(23.97,<br>29.71) | 31.45<br>(27.44,<br>36.74) | 28.09<br>(24.75,<br>32.48) | 0.0<br>04 |
| <b>AJCC STAGE, N (%)</b>          |                            |                            |                            |                            |                            | 0.051     |
|                                   | 13 ( 4.2)                  | 0 (0)                      | 9 (5)                      | 1 (3.4)                    | 3 (6)                      |           |
| <b>I</b>                          | 53 (17.2)                  | 10 (20.4)                  | 31 (17.2)                  | 9 (31)                     | 3 (6)                      |           |
| <b>II</b>                         | 115 (37.3)                 | 26 (53.1)                  | 64 (35.6)                  | 8 (27.6)                   | 17 (34)                    |           |
| <b>III</b>                        | 86 (27.9)                  | 9 (18.4)                   | 50 (27.8)                  | 9 (31)                     | 18 (36)                    |           |
| <b>IV</b>                         | 41 (13.3)                  | 4 (8.2)                    | 26 (14.4)                  | 2 (6.9)                    | 9 (18)                     |           |
| <b>T, N (%)</b>                   |                            |                            |                            |                            |                            | 0.091     |
|                                   | 1 ( 0.3)                   | 0 (0)                      | 1 (0.6)                    | 0 (0)                      | 0 (0)                      |           |
| <b>TIS</b>                        | 1 ( 0.3)                   | 0 (0)                      | 0 (0)                      | 1 (3.4)                    | 0 (0)                      |           |
| <b>T1</b>                         | 10 ( 3.2)                  | 2 (4.1)                    | 6 (3.3)                    | 2 (6.9)                    | 0 (0)                      |           |
| <b>T2</b>                         | 53 (17.2)                  | 8 (16.3)                   | 33 (18.3)                  | 9 (31)                     | 3 (6)                      |           |
| <b>T3</b>                         | 206 (66.9)                 | 34 (69.4)                  | 118 (65.6)                 | 15 (51.7)                  | 39 (78)                    |           |
| <b>T4</b>                         | 37 (12.0)                  | 5 (10.2)                   | 22 (12.2)                  | 2 (6.9)                    | 8 (16)                     |           |
| <b>N, N (%)</b>                   |                            |                            |                            |                            |                            | 0.017     |
|                                   | 1 ( 0.3)                   | 0 (0)                      | 1 (0.6)                    | 0 (0)                      | 0 (0)                      |           |
| <b>N0</b>                         | 178 (57.8)                 | 37 (75.5)                  | 102 (56.7)                 | 18 (62.1)                  | 21 (42)                    |           |
| <b>N1</b>                         | 81 (26.3)                  | 7 (14.3)                   | 52 (28.9)                  | 9 (31)                     | 13 (26)                    |           |
| <b>N2</b>                         | 47 (15.3)                  | 5 (10.2)                   | 25 (13.9)                  | 2 (6.9)                    | 15 (30)                    |           |
| <b>NX</b>                         | 1 ( 0.3)                   | 0 (0)                      | 0 (0)                      | 0 (0)                      | 1 (2)                      |           |
| <b>M, N (%)</b>                   |                            |                            |                            |                            |                            | 0.185     |
|                                   | 3 ( 1.0)                   | 0 (0)                      | 2 (1.1)                    | 0 (0)                      | 1 (2)                      |           |
| <b>M0</b>                         | 215 (69.8)                 | 37 (75.5)                  | 123 (68.3)                 | 19 (65.5)                  | 36 (72)                    |           |
| <b>M1</b>                         | 41 (13.3)                  | 4 (8.2)                    | 27 (15)                    | 1 (3.4)                    | 9 (18)                     |           |
| <b>MX</b>                         | 49 (15.9)                  | 8 (16.3)                   | 28 (15.6)                  | 9 (31)                     | 4 (8)                      |           |
| <b>PERINEURAL INVASION, N (%)</b> |                            |                            |                            |                            |                            | 0.372     |
|                                   | 127 (41.2)                 | 15 (30.6)                  | 82 (45.6)                  | 12 (41.4)                  | 18 (36)                    |           |
| <b>NO</b>                         | 139 (45.1)                 | 28 (57.1)                  | 75 (41.7)                  | 14 (48.3)                  | 22 (44)                    |           |
| <b>YES</b>                        | 42 (13.6)                  | 6 (12.2)                   | 23 (12.8)                  | 3 (10.3)                   | 10 (20)                    |           |
| <b>VENOUS INVASION, N (%)</b>     |                            |                            |                            |                            |                            | 0.607     |

|                                                 |                         |                         |                         |                         |                         |           |
|-------------------------------------------------|-------------------------|-------------------------|-------------------------|-------------------------|-------------------------|-----------|
|                                                 | 43 (14.0)               | 6 (12.2)                | 29 (16.1)               | 4 (13.8)                | 4 (8)                   |           |
| <b>NO</b>                                       | 205 (66.6)              | 33 (67.3)               | 119 (66.1)              | 21 (72.4)               | 32 (64)                 |           |
| <b>YES</b>                                      | 60 (19.5)               | 10 (20.4)               | 32 (17.8)               | 4 (13.8)                | 14 (28)                 |           |
| <b>PRE CEA LEVEL,<br/>MEDIAN (IQR)</b>          | 3.10<br>(1.70,<br>7.50) | 2.70<br>(2.00,<br>6.28) | 2.96<br>(1.70,<br>8.88) | 3.50<br>(1.35,<br>4.90) | 3.90<br>(2.05,<br>5.80) | 0.8<br>07 |
| <b>TUMOR LOCATION, N (%)</b>                    |                         |                         |                         |                         |                         | < 0.001   |
|                                                 | 12 ( 3.9)               | 4 (8.2)                 | 6 (3.3)                 | 1 (3.4)                 | 1 (2)                   |           |
| <b>LEFT</b>                                     | 158 (51.3)              | 6 (12.2)                | 114 (63.3)              | 10 (34.5)               | 28 (56)                 |           |
| <b>RIGHT</b>                                    | 138 (44.8)              | 39 (79.6)               | 60 (33.3)               | 18 (62.1)               | 21 (42)                 |           |
| <b>MSI STATUS, N (%)</b>                        |                         |                         |                         |                         |                         | < 0.001   |
|                                                 | 9 ( 2.9)                | 2 (4.1)                 | 5 (2.8)                 | 1 (3.4)                 | 1 (2)                   |           |
| <b>MSI_H</b>                                    | 46 (14.9)               | 38 (77.6)               | 2 (1.1)                 | 4 (13.8)                | 2 (4)                   |           |
| <b>MSI_L</b>                                    | 50 (16.2)               | 3 (6.1)                 | 32 (17.8)               | 4 (13.8)                | 11 (22)                 |           |
| <b>MSS</b>                                      | 203 (65.9)              | 6 (12.2)                | 141 (78.3)              | 20 (69)                 | 36 (72)                 |           |
| <b>ADDITIONAL PHARMACEUTICAL THERAPY, N (%)</b> |                         |                         |                         |                         |                         | 0.765     |
|                                                 | 255 (82.8)              | 41 (83.7)               | 149 (82.8)              | 26 (89.7)               | 39 (78)                 |           |
| <b>NO</b>                                       | 24 ( 7.8)               | 5 (10.2)                | 13 (7.2)                | 2 (6.9)                 | 4 (8)                   |           |
| <b>YES</b>                                      | 29 ( 9.4)               | 3 (6.1)                 | 18 (10)                 | 1 (3.4)                 | 7 (14)                  |           |
| <b>ADDITIONAL RADIATION THERAPY, N (%)</b>      |                         |                         |                         |                         |                         | 0.663     |
|                                                 | 249 (80.8)              | 40 (81.6)               | 144 (80)                | 26 (89.7)               | 39 (78)                 |           |
| <b>NO</b>                                       | 48 (15.6)               | 8 (16.3)                | 30 (16.7)               | 3 (10.3)                | 7 (14)                  |           |
| <b>YES</b>                                      | 11 ( 3.6)               | 1 (2)                   | 6 (3.3)                 | 0 (0)                   | 4 (8)                   |           |

**Supplementary Table 10. The degree of differentiation of CRC metastases from cBioportal database.**

| <b>VARIABLES</b>            | <b>TOTAL<br/>(N=626)</b> | <b>LIVER<br/>(N=473)</b> | <b>LUNG<br/>(N=64)</b> | <b>LYMPHNODE<br/>(N= 33)</b> | <b>PERITONEUM<br/>(N=56)</b> | <b>P</b> |
|-----------------------------|--------------------------|--------------------------|------------------------|------------------------------|------------------------------|----------|
| <b>PATIENT_GRADE, N (%)</b> |                          |                          |                        |                              |                              | 0.0015   |
| <b>MODERATELY</b>           | 489 ( 78.1)              | 380 (80.3)               | 55 (85.9)              | 21 (63.6)                    | 33 (58.9)                    |          |
| <b>MOD-POORLY</b>           | 74 (11.8)                | 47 (9.9)                 | 7 (10.9)               | 6 (18.2)                     | 14(25.0)                     |          |
| <b>POORLY</b>               | 63 ( 10.1)               | 46 (9.7)                 | 2 (3.1)                | 6 (18.2)                     | 9 (16.1)                     |          |

**Supplementary Table 11. CMS classifications in different CRC metastases.**

| <b>MET_SITES</b>       | <b>TOTAL<br/>(N=442)</b> | <b>LIVER<br/>(N=326)</b> | <b>LUNG<br/>(N=88)</b> | <b>LYMPHNODE<br/>(N= 9)</b> | <b>PERITONEUM<br/>(N=19)</b> | <b>P</b> |
|------------------------|--------------------------|--------------------------|------------------------|-----------------------------|------------------------------|----------|
| <b>SSP. CMS, N (%)</b> |                          |                          |                        |                             |                              | < 0.001  |
| <b>CMS1</b>            | 17 ( 3.8)                | 15 (4.6)                 | 0 (0)                  | 0 (0)                       | 2 (10.5)                     |          |
| <b>CMS2</b>            | 202 (45.7)               | 165 (50.6)               | 33 (37.5)              | 2 (22.2)                    | 2 (10.5)                     |          |
| <b>CMS3</b>            | 18 ( 4.1)                | 11 (3.4)                 | 1 (1.1)                | 6 (66.7)                    | 0 (0)                        |          |
| <b>CMS</b>             | 205 (46.4)               | 135 (41.4)               | 54 (61.4)              | 1 (11.1)                    | 15 (78.9)                    |          |
